# Supplementary material for: Applicability of evidence from previous systematic reviews on immunotherapy in current practice of childhood asthma treatment: a GRADE (Grading of Recommendations Assessment, Development and Evaluation) systematic review
Source: PubMed Central journal article supplement — BMJ Open. 2017 Dec 28;7(12):e016326. doi: 10.1136/bmjopen-2017-016326 (PMC5770836; doi:10.1136/bmjopen-2017-016326), 2017-12-28
Supplement: bmjopen-2017-016326.draft_revisions.pdf [file bmjopen-2017-016326.draft_revisions.pdf]

# BMJ Open

BMJ Open is committed to open peer review. As part of this commitment we make the peer review history of every article we publish publicly available.

When an article is published we post the peer reviewers' comments and the authors' responses online. We also post the versions of the paper that were used during peer review. These are the versions that the peer review comments apply to.

The versions of the paper that follow are the versions that were submitted during the peer review process. They are not the versions of record or the final published versions. They should not be cited or distributed as the published version of this manuscript.

BMJ Open is an open access journal and the full, final, typeset and author-corrected version of record of the manuscript is available on our site with no access controls, subscription charges or pay-per-view fees (<http://bmjopen.bmj.com>).

If you have any questions on BMJ Open's open peer review process please email [editorial.bmjopen@bmj.com](mailto:editorial.bmjopen@bmj.com)

# BMJ Open

## GRADE systematic review of immunotherapy in childhood asthma: evidence from previous systematic reviews no longer applicable in current clinical practice

|                                 |                                                                                                                                                                                                                                                                                           |
|---------------------------------|-------------------------------------------------------------------------------------------------------------------------------------------------------------------------------------------------------------------------------------------------------------------------------------------|
| Journal:                        | <i>BMJ Open</i>                                                                                                                                                                                                                                                                           |
| Manuscript ID                   | bmjopen-2017-016326                                                                                                                                                                                                                                                                       |
| Article Type:                   | Research                                                                                                                                                                                                                                                                                  |
| Date Submitted by the Author:   | 07-Feb-2017                                                                                                                                                                                                                                                                               |
| Complete List of Authors:       | van de Griendt, Erik-Jonas; De Kinderkliniek, Paediatrics; AMC, Paediatric Pulmonology<br>Tuut, Mariska; PROVA, guideline development and research<br>de Groot, Hans; Stichting Reinier Haga Groep, Paediatric Allergy<br>Brand, Paul; Isala klinieken, Princess Amalia Children's Clinic |
| <b>Primary Subject Heading</b>: | Evidence based practice                                                                                                                                                                                                                                                                   |
| Secondary Subject Heading:      | Respiratory medicine, Paediatrics, Immunology (including allergy)                                                                                                                                                                                                                         |
| Keywords:                       | Allergy < THORACIC MEDICINE, Asthma < THORACIC MEDICINE, Paediatric thoracic medicine < PAEDIATRICS, GRADE systematic review, Children, Immunotherapy                                                                                                                                     |
|                                 |                                                                                                                                                                                                                                                                                           |

SCHOLARONE™  
Manuscripts

1  
2  
3 1 **GRADE systematic review of immunotherapy in childhood asthma: evidence from**  
4 2 **previous systematic reviews no longer applicable in current clinical practice**  
5  
6  
7 3

8  
9 4 **Authors**

- 10  
11 5 1. Erik-Jonas **van de Griendt**\* MD, paediatric pulmonologist,  
12 6 DeKinderkliniek Almere and Academic Medical Centre Amsterdam,  
13 7 Hospitaaldreef 29, 1315 RC Almere, The Netherlands  
14 8 e.j.vandegriendt@amc.uva.nl *and*  
15 9  
16 10 Mariska K **Tuut**\*, MSc, epidemiologist,  
17 11 PROVA, Spoorstraat 31, 7051 CG Varsseveld, The Netherlands,  
18 12 m.tuut@provaweb.nl  
19 13  
20 14 2. Hans de Groot MD, PhD, allergologist,  
21 15 Department of Paediatric Allergology, Reinier de Graaf Group, Reinier de Graafweg  
22 16 5, 2625 AD Delft, The Netherlands, h.degroot@rdgg.nl  
23 17  
24 18 3. Paul L.P. Brand MD, PhD, paediatrician, Princess Amalia Children's Center, Isala  
25 19 Hospital, P.O. Box 10400, 8000 GK Zwolle, the Netherlands; UMCG Postgraduate  
26 20 School of Medicine, University Medical Center and University of Groningen, The  
27 21 Netherlands, p.l.p.brand@isala.nl  
28 22  
29 23  
30 24  
31 25  
32 26  
33 27  
34 28  
35 29  
36 30  
37 31  
38 32  
39 33  
40 34  
41 35  
42 36  
43 37  
44 38  
45 39  
46 40  
47 41  
48 42  
49 43  
50 44  
51 45  
52 46  
53 47  
54 48  
55 49  
56 50  
57 51  
58 52  
59 53  
60 54

21 *\*both authors contributed equally*

23 **Word count:** 3267 words (excluding title page, abstract, refs, figs, tables)

25 **Correspondence:**

26 Erik-Jonas van de Griendt, dept of paediatrics, DeKinderkliniek  
27 Hospitaaldreef 29  
28 1315 RC Almere  
29 The Netherlands  
30 telephone: +31 36 7630030  
31 e-mail: [e.j.vandegriendt@amc.uva.nl](mailto:e.j.vandegriendt@amc.uva.nl)

1  
2  
3 32 **Copyright/license for publication**  
4

5 33 The Corresponding Author has the right to grant on behalf of all authors and does grant on  
6 34 behalf of all authors, a worldwide licence to the Publishers and its licensees in perpetuity, in  
7 35 all forms, formats and media (whether known now or created in the future), to i) publish,  
8 36 reproduce, distribute, display and store the Contribution, ii) translate the Contribution into  
9 37 other languages, create adaptations, reprints, include within collections and create  
10 38 summaries, extracts and/or, abstracts of the Contribution, iii) create any other derivative  
11 39 work(s) based on the Contribution, iv) to exploit all subsidiary rights in the Contribution, v) the  
12 40 inclusion of electronic links from the Contribution to third party material where-ever it may be  
13 41 located; and, vi) licence any third party to do any or all of the above.  
14  
15  
16  
17  
18  
19  
20  
21

22 43 **Conflict of interest**  
23

24 44 All authors have completed the ICMJE uniform disclosure form at  
25 45 [http://www.icmje.org/coi\\_disclosure.pdf](http://www.icmje.org/coi_disclosure.pdf) and declare: no support from any organisation for the  
26 46 submitted work, no financial relationships with any organisations that might have an interest  
27 47 in the submitted work in the previous three years, no other relationships or activities that  
28 48 could appear to have influenced the submitted work.  
29  
30  
31  
32

33 49  
34  
35 50 **Funding**  
36

37 51 This work was performed as part of the revision of the Dutch Guideline on Paediatric  
38 52 Asthma. This guideline development was financially supported by the Dutch College of  
39 53 Paediatricians NVK and a grant of the Dutch Federation of Medical Specialists SKMS.  
40  
41  
42  
43  
44

45 55 **Contributorship statement**  
46

47 56 EJJ designed the study, chaired the guideline working group, provided clinical input (e.g.  
48 57 defined clinical relevant outcome measures, judged the literature review from a clinical point  
49 58 of view), wrote and revised the manuscript, and approved the final version.  
50  
51

52 59 MKT designed the study, was methodologist of the guideline working group, provided  
53 60 methodological input (e.g. provided literature search, selection, critical appraisal, GRADE  
54 61 evidence profiles), wrote and revised the manuscript, and approved the final version.  
55  
56  
57  
58  
59  
60

1  
2  
3 62 HdG was member of the guideline working group, designed the study, revised the  
4 63 manuscript and approved the final version.

5  
6  
7 64 PB provided clinical input, revised the manuscript and approved the final version.

8  
9 65 All authors meet full criteria for authorship, i.e. all contributed substantially, revised, approved  
10 66 the final version of the manuscript and agreed to be accountable for all aspects of the work.

11  
12 67

13  
14  
15 68 **Data sharing statement**

16  
17 69 Extra data can be accessed in the online repository. Apart from this, no additional data are  
18 70 available.

19  
20  
21 71

22  
23 72 **Transparency declaration**

24  
25  
26 73 The corresponding author affirms that this manuscript is an honest, accurate, and  
27 74 transparent account of the study being reported; that no important aspects of the study have  
28 75 been omitted; and that any discrepancies from the study as planned (and, if relevant,  
29 76 registered) have been explained.  
30  
31  
32  
33  
34  
35  
36  
37  
38  
39  
40  
41  
42  
43  
44  
45  
46  
47  
48  
49  
50  
51  
52  
53  
54  
55  
56  
57  
58  
59  
60

1  
2  
3 77 **Abbreviations**  
4

- 5 78 • 95%CI: 95% confidence interval  
6  
7 79 • AMSTAR: A Measurement Tool to Assess Systematic Reviews  
8  
9 80 • FEV<sub>1</sub>: forced expiratory volume in 1 second  
10  
11 81 • GRADE: Grading of Recommendations, Assessment, Development and Evaluation  
12  
13 82 • ICS: inhaled corticosteroids  
14  
15 83 • RCT: randomized controlled trial  
16  
17 84 • SCIT: subcutaneous immunotherapy  
18  
19 85 • SR: systematic review  
20  
21 86 • SLIT: sublingual immunotherapy  
22

23 87

24 88 **Key words:** allergy, asthma, children, adolescents, immunotherapy, efficacy, GRADE,  
25 89 systematic review

26 90  
27  
28  
29  
30  
31  
32  
33  
34  
35  
36  
37  
38  
39  
40  
41  
42  
43  
44  
45  
46  
47  
48  
49  
50  
51  
52  
53  
54  
55  
56  
57  
58  
59  
60

1  
2  
3 91 **Abstract**  
4

5 92 **Background.** Allergy plays a major role in both asthma and its common comorbidity allergic  
6 rhinitis. Immunotherapy is effective in the treatment of allergic rhinitis. Previous systematic  
7 reviews indicated its effectiveness in children with asthma. Because most children with  
8 persistent asthma now use ICS, the added benefit of immunotherapy in asthmatic children  
9 needs to be examined.  
10  
11

12  
13 97 **Objective.** We re-assessed the effectiveness of subcutaneous (SCIT) and sublingual  
14 immunotherapy (SLIT) in childhood asthma treatment focusing on studies with patient  
15 relevant outcome measures and children using ICS.  
16  
17

18  
19 100 **Methods.** We used the GRADE approach to systematically search and appraise the  
20 evidence using predefined critical patient relevant outcomes (asthma symptoms, asthma  
21 control and exacerbations). We searched to retrieve systematic reviews and randomized  
22 controlled trials on immunotherapy for asthma in children (1960 - 2015). We assessed the  
23 quality of the body of evidence with GRADE criteria.  
24  
25

26  
27 105 **Results.** The quality of the evidence for SCIT was very low due to a large risk of bias and  
28 indirectness (dated studies in children not using ICS). No effect of SCIT was found for  
29 asthma symptoms; no studies reported on asthma control. For asthma exacerbations,  
30 studies favoured SCIT. We have little confidence in this effect estimate, due to the very low  
31 quality of evidence. For SLIT, quality of the evidence was very low due to a large risk of bias,  
32 indirectness and imprecision. The outcome "asthma symptoms" could not be calculated due  
33 to lack of standardization and large clinical heterogeneity. Other predefined outcomes were  
34 not reported.  
35  
36

37 111  
38 112  
39  
40 113 **Conclusion.** The beneficial effects of immunotherapy in childhood asthma found in earlier  
41 reviews are no longer considered applicable, because of indirectness (studies performed in  
42 children not being treated according to current asthma guidelines with inhaled  
43 corticosteroids). There was absence of evidence to properly determine the effectiveness or  
44 lack thereof of immunotherapy in childhood asthma treatment.  
45  
46  
47  
48  
49  
50  
51  
52  
53  
54  
55  
56  
57  
58  
59  
60

118 **Article Summary**

- 119 • This study is the first review evaluating immunotherapy in asthmatic children using  
120 the GRADE approach, focusing more on clinically relevant than on statistically  
121 significant differences in patient relevant outcomes.
- 122 • Contrary to earlier reviews our study concluded that there is no evidence for  
123 beneficial effects of immunotherapy for asthma in children.
- 124 • Positive conclusions from earlier reviews were mainly based on populations using  
125 treatment incomparable to current practice.
- 126 • A limitation of the study was the lack of evidence, especially the lack of recent studies  
127 in current pediatric asthma populations.
- 128 • Due to the lack of standardization in study design and large clinical heterogeneity the  
129 clinical relevant outcome measure asthma symptoms could not be calculated in our  
130 study.



1  
2  
3 131 **Introduction**  
4

5 132 Asthma affects 10-15% of school-aged children. For children with persistent asthma, all  
6 133 international guidelines recommend daily controller treatment with inhaled corticosteroids  
7 134 (ICS), and reliever medication (short-acting  $\beta$ -2-agonists) as needed.<sup>1,2</sup> Although many  
8 135 children achieve complete asthma control using this effective and safe treatment,<sup>1</sup> some  
9 136 need additional treatment to obtain disease control.<sup>3,4</sup> Identification and treatment of  
10 137 comorbidities in children with problematic severe asthma is part of the stepwise approach to  
11 138 improve asthma control in these children.<sup>5,6</sup>

12  
13  
14  
15  
16  
17 139 The most common of these comorbidities in children with asthma is allergic rhinitis,<sup>5</sup>  
18 140 symptoms of which occur in 60-80% of asthmatic children.<sup>7,8</sup> Allergic rhinitis shares a  
19 141 common pathophysiological pathway with asthma, which has been described as the united  
20 142 airway concept.<sup>9</sup> Allergic rhinitis is associated with worse asthma control in children, and  
21 143 accumulating evidence suggests that treatment of allergic rhinitis with intranasal steroids  
22 144 improves not only rhinitis, but also asthma symptoms in these patients.<sup>7,10,11</sup>

23  
24  
25  
26  
27 145 When symptoms of allergic rhinitis cannot be sufficiently controlled with nasal corticosteroids  
28 146 and oral antihistamines,<sup>9,12</sup> immunotherapy can be considered as additional treatment.<sup>13</sup>  
29 147 Subcutaneous immunotherapy (SCIT) requires repeated injections with an allergen extract  
30 148 and is available for allergens such as grass and tree pollen and house dust mite. After  
31 149 disappointing results of low-dose preparations in drops, effective high-dose sublingual  
32 150 immunotherapy (SLIT) has now become available with grass pollen allergen extract in a daily  
33 151 sublingual tablet.<sup>14,15</sup> A Cochrane systematic review, first published in 2000, and last updated  
34 152 in 2010, reported beneficial effects of immunotherapy in children with asthma.<sup>16</sup> Most studies  
35 153 in this review, however, were performed in the 1980s, when most children with asthma were  
36 154 not using ICS.

37  
38  
39  
40  
41  
42  
43 155 As part of the update of the Dutch pediatric guideline on childhood asthma, we evaluated the  
44 156 literature on the added value of SCIT and SLIT in childhood asthma.<sup>17</sup> Our structured clinical  
45 157 question was to assess whether immunotherapy (subcutaneous or sublingual), as an add-on  
46 158 to usual care with daily ICS, improves asthma outcomes in children (6-12 years) and  
47 159 adolescents (>12 years) with persistent asthma and sensitization to relevant aeroallergens  
48 160 (grass or tree pollen, house dust mite, or combinations), with or without symptoms of allergic  
49 161 rhinitis.

50  
51  
52  
53  
54 162  
55  
56  
57  
58  
59  
60

## 163 Methods

164 We used the GRADE approach (Grading of Recommendations Assessment, Development  
 165 and Evaluation) to appraise and summarize the body of evidence. GRADE is an  
 166 internationally approved standard for managing complex evidence reviews.<sup>18</sup> In contrast to  
 167 former grading systems, GRADE focuses on the quality of the total body of evidence, instead  
 168 of judging single studies. Another important characteristic of GRADE is that predefined  
 169 outcomes with thresholds for clinical relevance are being used.<sup>19</sup> In earlier grading systems,  
 170 the evidence was summarized using outcomes reported in studies, not necessarily being  
 171 outcomes a guideline development group would be interested in.<sup>20</sup> GRADE avoids the use of  
 172 surrogate or intermediate outcomes, and uses outcomes and differences that are more  
 173 clinically relevant to patients instead. Starting from (several) randomized controlled trials or  
 174 observational studies, for each outcome the quality of evidence can be downgraded or  
 175 upgraded, for instance based on risk of bias, inconsistency, indirectness, possible publication  
 176 bias, and dose-response relation.

177 The guideline development group included an epidemiologist, paediatric respiratory  
 178 physicians, paediatricians, an allergist, an ear-nose-throat specialist, a family physician, a  
 179 lung function technician, a youth public health care physician, and patient representatives.  
 180 The guideline development group predefined clinically relevant outcomes and divided these  
 181 into critical (contributing to the overall quality of evidence), important (also relevant to the  
 182 content of the guideline) and not important outcomes. For each outcome, a minimal clinically  
 183 important difference was defined *a priori*. The outcomes taken into account in our literature  
 184 review are summarized in *table 1*, with corresponding minimal clinically important  
 185 differences.<sup>21-24</sup>

186 **Table 1. Patient relevant outcomes and clinical relevance**

| Outcome                            | Importance | Minimal clinically important difference |
|------------------------------------|------------|-----------------------------------------|
| Asthma symptoms                    | Critical   | ACT: 3 c-ACT: (2-)3*                    |
| (Severe) exacerbations             | Critical   | NNT n=10                                |
| Asthma control                     | Critical   | ACT: 3 c-ACT: (2-)3*                    |
| (Disease-specific) quality of life | Important  | PAQLQ: 0.5 (scale 0-7)*                 |
| Change in FEV <sub>1</sub>         | Important  | >5%predicted                            |

187 \* or comparable differences on other valid scales representing this outcome

188 Abbreviations: ACT: asthma control test; c-ACT: child ACT; PAQLQ: Pediatric Asthma Quality of Life  
 189 Questionnaire

190 We applied a sensitive search strategy to retrieve all available evidence addressing the  
 191 clinical question, focusing on systematic reviews (SRs) and randomized controlled trials  
 192 (RCTs) about asthma and immunotherapy in children. We searched for systematic reviews in  
 193 the Cochrane Database of Systematic Reviews, and the Database of Abstracts of Reviews of  
 194 Effectiveness, and we searched The Cochrane Central Trial Register to update existing

1  
2  
3 195 reviews. Literature searches were performed in March 2012 for the guideline (from 1960  
4 196 onwards), and updated in April 2015 for the purpose of this review (*see table E1 in the*  
5 *Online Repository*). Two reviewers (EJvdG, MKT) independently screened the abstracts  
6 197 using predefined inclusion criteria: methodology (SRs and RCTs), patients (children with  
7 198 allergic asthma), and SCIT and/or SLIT as an intervention. Animal studies, conference  
8 199 abstracts, and studies published in languages other than English, Dutch and German were  
9 200 excluded. Differences between reviewers were resolved by consensus. Selected abstracts  
10 201 were critically appraised with respect to study population and methodological aspects  
11 202 (systematic search and selection, randomization of patients), which led to a further selection.  
12 203 An expert in the field (HdG) judged the selection for completeness.  
13 204

14  
15 205 All included studies were summarized in evidence tables by two reviewers (EJvdG, MKT).  
16 206 SRs were critically appraised using the AMSTAR checklist (A Measurement Tool to Assess  
17 207 Systematic Reviews).<sup>25</sup> AMSTAR scores range from 0-11, a higher score indicating better  
18 208 quality (less bias). The Jadad scale was used to assess the methodological quality of each  
19 209 RCT.<sup>26</sup> This score ranges from 0-5, a higher score denoting a better quality. All eligible  
20 210 studies together defined the body of evidence, of which the quality was determined (per  
21 211 relevant outcome and overall quality) and GRADE Profiles were created. Results from SRs  
22 212 and RCTs were pooled, if possible, in meta-analyses using RevMan 5. We calculated  
23 213 standardized mean differences for continuous outcomes, because of the usage of different  
24 214 symptom scales in the underlying studies. We calculated risk ratios for dichotomous  
25 215 outcomes, to compare the probability of these outcomes between the intervention and  
26 216 control groups. In the meta-analyses we used random effects models, because of the  
27 217 possibility of generalization of the outcomes for different allergens, and tested the difference  
28 218 between intervention and control with the inverse variance method, since this method is  
29 219 typically used in meta-analyses to combine the results of independent studies. We reported  
30 220 95% confidence intervals (pre-defined significance level: 0.05). Conclusions were drawn,  
31 221 based on quality and content, per outcome and discussed in the expert group until  
32 222 consensus was reached.

### 33 223 **Patient involvement**

34 224 The guideline development group included patient representatives who helped defining our  
35 225 clinical question, approved outcome measures and assessed its clinical relevancy. The  
36 226 burden of interventions and patient considerations were assessed as part of the GRADE  
37 227 evaluation. Patients were not directly involved in this systematic review since we reviewed  
38 228 published literature.

1  
2  
3 229 **Results**

4  
5 230 ***Literature search and selection***

6  
7 231 Screening of titles and abstracts yielded 83 eligible studies, 10 of which fulfilled the inclusion  
8 criteria.<sup>16,27-35</sup> After examining these 10 papers in full, 5 more studies were excluded (*figure*  
9 232 1).  
10 233

11  
12 234 Experts in the guideline working group confirmed that no relevant publications were missed.  
13 235 The updated search (April 2015) revealed 43 additional studies, of which 2 fulfilled the  
14 236 inclusion criteria.<sup>36,37</sup> Full text examination resulted in exclusion of these 2 studies.

15  
16 237

17  
18 238 < *figure 1* >

19  
20 239

21  
22 240 ***Results of SCIT***

23  
24 241 *Description of studies*

25  
26 242 We retrieved one Cochrane SR on the effectiveness of SCIT in patients with asthma ,  
27 243 including 90 RCTs with a total of 3,792 patients.<sup>16</sup> This was a high-quality review (AMSTAR  
28 244 score 10/11). Fourteen of the included RCTs were performed in children exclusively; another  
29 245 24 included children and adults. In a few studies the age inclusion criteria were not clear. The  
30 246 characteristics of this review are summarized in an evidence table (*see table E2 in the Online*  
31 247 *Repository*). Only nine RCTs included in this review reported on our predefined outcomes in  
32 248 children. In these nine studies different allergens or combinations were studied (house dust  
33 249 mite (3), dog dander (1), grass pollen (1), mold (1), grass pollen/house dust mite (1), tailored  
34 250 combinations (2)). Two RCTs published after the 2010 Cochrane review were retrieved. In  
35 251 the first, the clinical efficacy of house dust mite-specific SCIT in 20 asthmatic children was  
36 252 compared to no intervention in 20 others; patients were followed up for six months.<sup>34</sup> In the  
37 253 other, the effects of allergen-specific SCIT on corticosteroid dose in asthmatic children was  
38 254 evaluated.<sup>35</sup> Details of all included RCTs are summarized in the evidence table (*see table E3*  
39 255 *in the Online Repository*).

40  
41 256 *Quality of the evidence*

42  
43 257 Little information was given about the included studies in the Cochrane review; e.g. follow-up  
44 258 was not stated. There were also other concerns about the quality of the literature, e.g. not all  
45 259 studies were double-blind and placebo-controlled, and randomization procedures were poor.  
46  
47  
48  
49  
50  
51  
52  
53  
54  
55  
56  
57  
58  
59  
60

260 Therefore we re-analyzed the individual paediatric studies in the Cochrane review, plus the  
261 added studies.<sup>34,35</sup> Jadad scores of the single studies are presented in *table 2*.

262 **Table 2. Jadad scores of RCTs on SCIT**

|                              | Randomization* | Blinding** | Withdrawals <sup>#</sup> | Total |
|------------------------------|----------------|------------|--------------------------|-------|
| Adkinson 1997 <sup>38</sup>  | 1              | 1          | 1                        | 3     |
| Altintas 1999 <sup>39</sup>  | 1              | 1          | 1                        | 3     |
| Dreborg 1986 <sup>40</sup>   | 1              | -          | -                        | 1     |
| Hill 1982 <sup>41</sup>      | 1              | -          | -                        | 1     |
| Johnstone 1961 <sup>42</sup> | 2              | 1          | -                        | 3     |
| Johnstone 1968 <sup>43</sup> | 2              | 1          | 1                        | 4     |
| Price 1984 <sup>44</sup>     | 1              | 1          | -                        | 3     |
| Tsai 2010 <sup>34</sup>      | 1              | -          | 1                        | 2     |
| Valovirta 1984 <sup>45</sup> | 1              | -          | 1                        | 2     |
| Warner 1978 <sup>46</sup>    | 1              | 1          | 1                        | 3     |
| Zielen 2010 <sup>35</sup>    | 1              | 1          | 1                        | 3     |

263 \* 1 point if randomization is mentioned; 1 additional point if the method of randomization is appropriate; minus 1  
264 point if the method of randomization is inappropriate

265 \*\* 1 point if blinding is mentioned; 1 additional point if the method of blinding is appropriate; minus 1 point if the  
266 method of blinding is inappropriate

267 <sup>#</sup> 1 point if the number and the reasons for withdrawal in each group are stated

268 The quality of the body of evidence for all critical and important outcomes was very low (*table*  
269 3), mainly due to large risk of bias and indirectness. The large risk of bias was caused by a  
270 lack of allocation concealment, lack of information on follow-up, and loss to follow-up. The  
271 reason for downgrading for indirectness was the publication year of the underlying studies;  
272 populations and interventions were considered inapplicable to current clinical practice.

273 **Table 3. GRADE Evidence Profile SCIT**

| Quality assessment                                       |              |                           |               |                           |             |                      | Number of patients |                 | Effect                         |                                                                     | Quality          | Importance |
|----------------------------------------------------------|--------------|---------------------------|---------------|---------------------------|-------------|----------------------|--------------------|-----------------|--------------------------------|---------------------------------------------------------------------|------------------|------------|
| Number of studies                                        | Study design | Risk of bias              | Inconsistency | Indirectness              | Imprecision | Other considerations | SCIT               | No intervention | Relative (95%CI)               | Absolute (95%CI)                                                    |                  |            |
| Asthma symptoms (assessed with: Asthma symptom scores)   |              |                           |               |                           |             |                      |                    |                 |                                |                                                                     |                  |            |
| 5 <sup>a</sup>                                           | RCT          | Very serious <sup>b</sup> | Not serious   | Serious <sup>c</sup>      | Not serious | None                 | 136                | 286             | -                              | Standardized Mean Difference 0.04 lower (0.42 lower to 0.33 higher) | ⊕○○○<br>VERY LOW | CRITICAL   |
| Exacerbations (assessed with: Symptomatic deterioration) |              |                           |               |                           |             |                      |                    |                 |                                |                                                                     |                  |            |
| 5 <sup>a</sup>                                           | RCT          | Serious <sup>d</sup>      | Not serious   | Very serious <sup>e</sup> | Not serious | None                 | 64/253 (25.3%)     | 92/153 (60.1%)  | Risk ratio 0.43 (0.34 to 0.56) | 343 fewer per 1000 (from 265 fewer to 397 fewer)                    | ⊕○○○<br>VERY LOW | CRITICAL   |

|                                |   |   |   |   |   |   |   |   |   |   |   |           |
|--------------------------------|---|---|---|---|---|---|---|---|---|---|---|-----------|
| Asthma control – not reported  |   |   |   |   |   |   |   |   |   |   |   |           |
| -                              | - | - | - | - | - | - | - | - | - | - | - | CRITICAL  |
| Quality of life – not reported |   |   |   |   |   |   |   |   |   |   |   |           |
| -                              | - | - | - | - | - | - | - | - | - | - | - | IMPORTANT |
| Lung function – not reported   |   |   |   |   |   |   |   |   |   |   |   |           |
| -                              | - | - | - | - | - | - | - | - | - | - | - | IMPORTANT |

274 Abbreviations: 95%CI: 95% confidence interval; RCT: randomized controlled trials; SCIT: subcutaneous

275 immunotherapy

276 a. Studies in Cochrane review Abramson + Tsai

277 b. The underlying studies had a quite large risk of bias, due to lack of allocation concealment, problems with

278 blinding, and lack of information on follow-up (and loss-to-follow-up)

279 c. We downgraded for indirectness, because the included studies are quite old and maintenance medication may

280 have changed probably; thus, study populations may alter from nowadays patients with moderate to severe

281 asthma

282 d. We downgraded for risk of bias, because of problems with blinding and loss-to-follow-up

283 e. We assessed very serious indirectness, because most included studies for this outcome are very old, and

284 carried out before the ICS-era; thus, patients nowadays differ from study populations

### 285 Critical outcomes

286 Asthma symptoms. Four small studies carried out in children only reported this outcome in

287 the Cochrane review.<sup>16</sup> We extracted these results from the Cochrane review and updated

288 these with the results from Tsai et al.<sup>34</sup> Results are presented in *figure 2*.

289

290 <figure 2 >

291

292 The meta-analysis showed no significant effect of SCIT on asthma symptoms.

293 Asthma exacerbations. Five studies (published 1961-1984) in the Cochrane review, carried

294 out in children only, reported this outcome.<sup>16</sup> No relevant studies of sufficient quality were

295 published afterwards. Our meta-analysis included 253 patients on immunotherapy and 153

296 on placebo. The pooled risk ratio was 0.47 (95%CI: 0.31 – 0.72), favouring immunotherapy

297 (see *figure 3*). The absolute risk reduction was 35%, giving a number needed to treat of 3.

298

299 < figure 3 >

300

301 No studies reported results on the critical outcome asthma control.

### 302 Important outcomes

303 No studies reported results on quality of life and lung function (FEV<sub>1</sub>).

### 304 **Results of SLIT**



305 Description of studies and quality of the evidence

306 We retrieved two SRs on SLIT in patients with asthma.<sup>29,32</sup> The characteristics of these SRs  
 307 are summarized in evidence table E2 (*Online Repository*). The quality of the reviews was  
 308 moderate; both had an AMSTAR score of 7/11. Weaknesses included the absence of an 'a  
 309 priori design', exclusion of grey literature, not assessing the likelihood of publication bias and  
 310 not mentioning conflicts of interest in one review,<sup>29</sup> and the absence of an 'a priori design', no  
 311 information about excluded studies, too firm conclusions compared to the weak evidence,  
 312 and not assessing the likelihood of publication bias in the other.<sup>32</sup> One review included both  
 313 children and adults, and patients with asthma and/or rhinitis.<sup>29</sup> Because of the quality  
 314 concerns of both existing SRs, we set out to perform a meta-analysis of the original studies  
 315 that fulfilled our selection criteria. Jadad scores of selected studies, as well as an overview of  
 316 the outcomes of those studies, are presented in *table 4*. Study characteristics are  
 317 summarized in the evidence table (*see table E4 in the Online Repository*). We rated the  
 318 quality of evidence to be very low, due to a large risk of bias, imprecision and indirect  
 319 evidence.

320 **Table 4. Summary of quality and outcome measures of selected RCT's in reviews**  
 321 **Calamita et al and Penagos et al.**<sup>29,32</sup>

| Review                 | RCT                                    | Eligible                                         | Jadad-score    |            |              |       | Reported on asthma symptoms | Reported on exacerbations | Reported on asthma control | Reported on disease specific quality of life | Reported on lung function (FEV <sub>1</sub> ) |
|------------------------|----------------------------------------|--------------------------------------------------|----------------|------------|--------------|-------|-----------------------------|---------------------------|----------------------------|----------------------------------------------|-----------------------------------------------|
|                        |                                        |                                                  | Randomization* | Blinding** | Withdrawals# | Total |                             |                           |                            |                                              |                                               |
| Calamita <sup>29</sup> | Bahceciler 2001 <sup>47</sup>          | Yes                                              | 1              | 1          | 1            | 3     | +                           | -                         | -                          | -                                            | -                                             |
|                        | Hirsch 1997 <sup>48</sup>              | Yes                                              | 2              | 1          | 1            | 4     | +                           | -                         | -                          | -                                            | -                                             |
|                        | Niu 2004 <sup>24</sup>                 | No, conference abstract                          |                |            |              |       |                             |                           |                            |                                              |                                               |
|                        | Novembre 1991 <sup>49</sup>            | No, Italian language                             |                |            |              |       |                             |                           |                            |                                              |                                               |
|                        | Pajno 2003 <sup>50</sup>               | Yes                                              | 2              | 1          | 1            | 4     | +                           | -                         | -                          | -                                            | -                                             |
|                        | Pajno 2004 <sup>51</sup>               | Yes                                              | 2              | 1          | 1            | 4     | -                           | -                         | -                          | -                                            | +                                             |
|                        | Rodriguez Santos 2004 <sup>52</sup>    | No, Spanish language                             |                |            |              |       |                             |                           |                            |                                              |                                               |
|                        | Rolinck-Werninghaus 2004 <sup>53</sup> | Yes                                              | 1              | 2          | 0            | 3     | +                           | -                         | -                          | -                                            | -                                             |
|                        | Yuksele 1999 <sup>54</sup>             | No, Spanish language                             |                |            |              |       |                             |                           |                            |                                              |                                               |
| Penagos <sup>32</sup>  | Bahceciler 2001 <sup>47</sup>          | Overlap with Calamita                            |                |            |              |       |                             |                           |                            |                                              |                                               |
|                        | Caffarelli 2000 <sup>55</sup>          | No, children with asthma not separately analyzed |                |            |              |       |                             |                           |                            |                                              |                                               |
|                        | Hirsch 1997 <sup>48</sup>              | Overlap with Calamita                            |                |            |              |       |                             |                           |                            |                                              |                                               |
|                        | Ippoliti 2003 <sup>56</sup>            | Yes                                              | 1              | 1          | 0            | 2     | +                           | -                         | -                          | -                                            | +                                             |

|       |                                        |                                                  |   |   |   |   |   |   |   |   |   |
|-------|----------------------------------------|--------------------------------------------------|---|---|---|---|---|---|---|---|---|
|       | Niu 2006 <sup>57</sup>                 | Yes                                              | 1 | 1 | 1 | 3 | + | - | - | - | + |
|       | Pajno 2000 <sup>58</sup>               | Yes                                              | 2 | 1 | 0 | 3 | + | - | - | - | - |
|       | Rolinck-Werninghaus 2004 <sup>53</sup> | Overlap with Calamita                            |   |   |   |   |   |   |   |   |   |
|       | Tari 1990 <sup>59</sup>                | No, Spanish language                             |   |   |   |   |   |   |   |   |   |
|       | Vourdas 1998 <sup>60</sup>             | No, children with asthma not separately analyzed |   |   |   |   |   |   |   |   |   |
| Total |                                        |                                                  |   |   |   |   | 7 | 0 | 0 | 0 | 3 |

322 Abbreviations: FEV<sub>1</sub>: forced expiratory volume in 1 second; RCT: randomized controlled trial

323 \* 1 point if randomization is mentioned; 1 additional point if the method of randomization is appropriate; minus 1  
324 point if the method of randomization is inappropriate

325 \*\* 1 point if blinding is mentioned; 1 additional point if the method of blinding is appropriate; minus 1 point if the  
326 method of blinding is inappropriate

327 # 1 point if the number and the reasons for withdrawal in each group are stated

328 § Same patients as Pajno 2003<sup>60</sup>

### 329 Critical outcomes

330 Asthma symptoms. Seven of the included studies reported on asthma symptoms. Different  
331 symptom scores were used, none of them standardized or validated. Clinical differences in  
332 asthma scores were not defined and most studies reported improvement in the treatment  
333 group as well in the control group. Due to this large clinical heterogeneity we were not able to  
334 compile a meta-analysis of the results of the individual studies. Since studies did not report  
335 results in a clearly comparable way, reporting the results of the individual studies was  
336 considered unreliable.

337 Other critical outcomes. No studies reported results on the critical outcomes exacerbations  
338 and asthma control.

### 339 Important outcomes

340 Quality of life. No studies reported results on the outcome disease specific quality of life.

341 Lung function. Three studies reported results on lung function (FEV<sub>1</sub>). One of the studies  
342 reported no numeric data on lung function.<sup>57</sup> One study reported no variance (standard  
343 deviation), and no comparison of the baseline data.<sup>56</sup> The only remaining study reported on  
344 FEV<sub>1</sub> percentage predicted,<sup>51</sup> and reported no significant differences between treatment  
345 groups, neither at baseline nor at follow-up.

346



1  
2  
3 347 **Discussion**

4  
5 348 Summary of main results

6  
7 349 Our GRADE systematic review showed no evidence of a significant difference in asthma  
8 350 symptoms between SCIT and placebo in children with allergic asthma, but some evidence for  
9 351 a significant and clinically relevant reduction in asthma exacerbations was found in SCIT-  
10 352 treated children. We have little confidence in the effect estimate, however, due to a large risk  
11 353 of bias and indirectness. Thus, the true effect of SCIT on exacerbations and asthma  
12 354 symptoms in the target population of interest is likely to be substantially different from the  
13 355 estimate of effect. There was absence of evidence on the effects of SCIT on lung function,  
14 356 asthma control, and quality of life in children with allergic asthma. There was no evidence for  
15 357 a beneficial effect of SLIT in reducing asthma symptoms and exacerbations, quality of life  
16 358 and lung function in children with allergic asthma. Our review does not address the efficacy  
17 359 of immunotherapy in children regarding complaints of allergic rhinitis and/or conjunctivitis,  
18 360 without having asthma.

19  
20  
21 361 Quality of the evidence / GRADE methodology

22  
23  
24 362 The overall quality of the evidence about the effectiveness of SCIT and SLIT was very low.  
25 363 This implicates that our confidence in the effect estimates is very limited. The true effect of  
26 364 SCIT and SLIT on patient relevant asthma outcomes in children with asthma may be  
27 365 substantially different from our estimates of the effect. We cannot conclude that the possible  
28 366 desirable effects of SCIT and SLIT outweigh the undesirable effects (e.g. influence on quality  
29 367 of life, adverse events, or increased resource expenditure), nor can we reject that  
30 368 hypothesis. Our concerns about the quality of evidence are based on (very) serious risk of  
31 369 bias and indirectness in the underlying primary studies. Firstly, the quality of many studies  
32 370 had to be downgraded because of risk of bias due to lack of allocation concealment, lack of  
33 371 information on follow-up, and loss to follow-up. Secondly, included studies were  
34 372 heterogeneous in the patients included and allergen extracts used, with different dosing  
35 373 regimens and duration being studied, targeting different inhaled allergens. We have concerns  
36 374 about the potential different responses and the generalizability of the evidence. Thirdly, and  
37 375 most importantly, for SCIT, the quality of the body of evidence was downgraded because of  
38 376 indirectness, since patients in the original studies long ago are likely to differ considerably  
39 377 from patients nowadays.

40  
41  
42 378 Thirdly, different studies used variable definitions of asthma exacerbations. We had to use  
43 379 'worsening of asthma', which may not represent real-life patient relevant exacerbations. This  
44  
45  
46  
47  
48  
49  
50  
51  
52  
53  
54  
55  
56  
57  
58  
59  
60

1  
2  
3 380 may decrease the applicability of the evidence. In addition, there were no studies using the  
4 381 predefined important outcomes quality of life and asthma control.

5  
6 382 Finally, and most importantly, several included studies dated from the 1980s or earlier, when  
7 383 allergic rhinitis treatment with selective antihistamines and nasal corticosteroids was not  
8 384 available. As a result, the allergic rhinitis patients in these studies cannot be compared to  
9 385 patients in clinical practice today. Similarly, widespread use of ICS was not introduced in  
10 386 childhood asthma treatment until the 1990s.<sup>61</sup> Most studies on SCIT in children with asthma  
11 387 were published decades ago, during the pre-ICS era. The patients in the described studies  
12 388 represent an incomparable group compared to the child with asthma in contemporary clinical  
13 389 practice. Specifically, it is unclear whether the beneficial effects found in the systematic  
14 390 review of earlier studies is applicable to children with asthma treated according to  
15 391 contemporary guidelines with daily ICS controller therapy.<sup>16</sup>

16  
17 392 In our opinion and that of others, the GRADE approach is superior to former methods of SRs,  
18 393 because it focuses on predefined patient relevant outcomes, predefined minimally clinical  
19 394 important differences and because it judges the complete body of evidence. One RCT  
20 395 among paediatricians studied the influence of different guideline grading systems on  
21 396 clinician's decisions.<sup>62</sup> GRADE showed the largest change in direction on the clinical  
22 397 decision. However, the added value of GRADE on guideline implementation or patient care,  
23 398 has not been formally evaluated, the GRADE approach is still rather complex for non-  
24 399 methodologists.

25  
26 400 To formulate recommendations for clinical practice, not only the body of evidence concerning  
27 401 effectiveness of an intervention is important. Recommendations should balance the benefits  
28 402 and harms of the intervention of interest, and take patient preferences and resource use into  
29 403 account. Since (after critical evaluation) no benefits of SCIT and SLIT for children with  
30 404 asthma were determined, we consider it unlikely that the benefits will exceed the harms.  
31 405 Patient preferences were included in the formulation of our guideline recommendations.

#### 32 406 Agreements and disagreements with other studies or reviews

33  
34 407 Using GRADE and re-analyzing data from children with allergic asthma only, we came to  
35 408 different conclusions on the effectiveness of SCIT and SLIT in children with asthma than the  
36 409 authors of the original SRs. We believe this highlights the importance of using GRADE  
37 410 methodology to systematically review evidence for patient relevant outcomes, not focusing  
38 411 on levels of evidence, but on underlying study validity, precision, directness, and applicability  
39 412 in current clinical practice. A recent The 2009 position paper on SLIT describes history, use  
40 413 and applicability of this treatment for allergic rhinitis.<sup>63</sup> It positions SLIT in children as a safe

1  
2  
3 414 and useful therapy above and after more regular treatment for allergic rhinitis. Potential  
4 415 positive treatment outcome for allergic asthma is however mainly based on literature in  
5  
6 416 adults. We show the lack of evidence and lack of applicability of treatment of immunotherapy  
7  
8 417 for asthma in children. Since we have worries on the applicability of evidence in adults on  
9  
10 418 children (who are still developing their immune system), we think further studies that  
11  
12 419 compare immunotherapy for the contemporary treatment of asthma in children are urgently  
13  
14 420 needed to fill in this gap.

15 421 Recently, a Cochrane SR on SLIT for asthma found a similar lack of data for important  
16  
17 422 outcomes (e.g. exacerbations, symptom scores, quality of life) as we did.<sup>64</sup> Contrary to our  
18  
19 423 study, the authors did no separate analysis for adults and children, and patients with asthma  
20  
21 424 were not separately analyzed from patients without asthma.

## 22 425 **Conclusions**

23  
24 426 Focusing on predefined patient relevant outcomes, and critically appraising the body of  
25  
26 427 evidence using original studies and GRADE methodology, our systematic review on the  
27  
28 428 effects of immunotherapy in children with asthma came to different conclusions than previous  
29  
30 429 systematic reviews . We believe that this underscores the importance of using GRADE  
31  
32 430 methodology in systematically reviewing evidence.

33  
34 431 We found absence of valid applicable evidence on improvement of clinically relevant asthma  
35  
36 432 outcomes in children with allergic asthma using SCIT or SLIT. This absence of evidence is  
37  
38 433 due to serious risk of bias, large clinical heterogeneity between studies, and most importantly  
39  
40 434 due to lack of applicability because studies were performed in the pre-ICS era.

41  
42 435 Since the effect of immunotherapy added to contemporary asthma treatment with daily  
43  
44 436 controller therapy is not clear, the drawbacks of immunotherapy should be considered  
45  
46 437 carefully. SCIT is a complex and intensive form of treatment, associated with a (very) long  
47  
48 438 duration of treatment, and considerable burden to the patient with (monthly) injections under  
49  
50 439 adequate medical supervision due to potential (however rare) dangerous side effects, and  
51  
52 440 may have relatively high costs and resource use. In SLIT the risk of serious side-effects is  
53  
54 441 considerably smaller, but the other drawbacks of immunotherapy apply equally to this  
55  
56 442 treatment. In our opinion therefore, when balancing the absence of evidence on a clear  
57  
58 443 beneficial effect of SCIT or SLIT on clinically relevant patient outcomes in children with  
59  
60 444 asthma with the considerable burden and costs of SCIT and SLIT, we do not recommend this  
445  
446 treatment to children with asthma until further high-quality evidence from well-designed RCTs  
447  
448 in children comparing SCIT or SLIT to contemporary asthma treatment becomes available.

1  
2  
3 448 **Acknowledgments**  
4

5 449 We like to thank Nicole Boluyt MD, PhD, Diemen, The Netherlands, for her help in the study  
6  
7 450 design and revision of an earlier version of the manuscript.  
8  
9  
10  
11  
12  
13  
14  
15  
16  
17  
18  
19  
20  
21  
22  
23  
24  
25  
26  
27  
28  
29  
30  
31  
32  
33  
34  
35  
36  
37  
38  
39  
40  
41  
42  
43  
44  
45  
46  
47  
48  
49  
50  
51  
52  
53  
54  
55  
56  
57  
58  
59  
60

For peer review only

451 **References**

- 452 1. GINA. Global Strategy For Asthma Management And Prevention. 2012.
- 453 2. British Thoracic Society. British Guideline on the management of asthma. 2011.
- 454 3. de Groot EP, Kreggemeijer WJ, Brand PL. Getting the basics right resolves most  
455 cases of uncontrolled and problematic asthma. *Acta Paediatr.* 2015;104(9):916-21.
- 456 4. Hedlin G, Bush A, Lodrup Carlsen K, Wennergren G, De Benedictis FM, Melen E, et  
457 al. Problematic severe asthma in children, not one problem but many: a GA2LEN initiative.  
458 *Eur Respir J.* 2010;36(1):196-201.
- 459 5. de Groot EP, Duiverman EJ, Brand PL. Comorbidities of asthma during childhood:  
460 possibly important, yet poorly studied. *Eur Respir J.* 2010;36(3):671-8.
- 461 6. Lodrup Carlsen KC, Hedlin G, Bush A, Wennergren G, de Benedictis FM, De Jongste  
462 JC, et al. Assessment of problematic severe asthma in children. *Eur Respir J.*  
463 2011;37(2):432-40.
- 464 7. de Groot EP, Nijkamp A, Duiverman EJ, Brand PL. Allergic rhinitis is associated with  
465 poor asthma control in children with asthma. *Thorax.* 2012;67(7):582-7.
- 466 8. Shamsain MH, Shamsian N. Prevalence and severity of asthma, rhinitis, and atopic  
467 eczema in 13- to 14-year-old schoolchildren from the northeast of England. *Ann Allergy*  
468 *Asthma Immunol.* 2001;86(4):428-32.
- 469 9. Brozek JL, Bousquet J, Baena-Cagnani CE, Bonini S, Canonica GW, Casale TB, et  
470 al. Allergic Rhinitis and its Impact on Asthma (ARIA) guidelines: 2010 revision. *J Allergy Clin*  
471 *Immunol.* 2010;126(3):466-76.
- 472 10. Kersten ET, van Leeuwen JC, Brand PL, Duiverman EJ, de Jongh FH, Thio BJ, et al.  
473 Effect of an intranasal corticosteroid on exercise induced bronchoconstriction in asthmatic  
474 children. *Pediatr Pulmonol.* 2012;47(1):27-35.
- 475 11. Rachelefsky G, Farrar JR. A control model to evaluate pharmacotherapy for allergic  
476 rhinitis in children. *JAMA Pediatr.* 2013;167(4):380-6.
- 477 12. de Groot H, Brand PL, Fokkens WF, Berger MY. Allergic rhinoconjunctivitis in  
478 children. *BMJ.* 2007;335(7627):985-8.
- 479 13. Dretzke J, Meadows A, Novielli N, Huissoon A, Fry-Smith A, Meads C. Subcutaneous  
480 and sublingual immunotherapy for seasonal allergic rhinitis: a systematic review and indirect  
481 comparison. *J Allergy Clin Immunol.* 2013;131(5):1361-6.
- 482 14. Bufe A, Eberle P, Franke-Beckmann E, Funck J, Kimmig M, Klimek L, et al. Safety  
483 and efficacy in children of an SQ-standardized grass allergen tablet for sublingual  
484 immunotherapy. *J Allergy Clin Immunol.* 2009;123(1):167-73 e7.

- 1  
2  
3 485 15. Wahn U, Tabar A, Kuna P, Halcken S, Montagut A, de Beaumont O, et al. Efficacy and  
4 486 safety of 5-grass-pollen sublingual immunotherapy tablets in pediatric allergic  
5  
6 487 rhinoconjunctivitis. *J Allergy Clin Immunol*. 2009;123(1):160-6 e3.  
7  
8 488 16. Abramson MJ, Puy RM, Weiner JM. Injection allergen immunotherapy for asthma.  
9 489 *Cochrane Database Syst Rev*. 2010(8):CD001186.  
10  
11 490 17. Dutch Pediatric Society. NVK Richtlijn Astma bij kinderen [Dutch pediatric asthma  
12 491 guidelines]. 2013.  
13 492 <http://www.nvk.nl/tabid/1558/articleType/ArticleView/articleId/708/default.aspx>  
14  
15 493 18. Guyatt G, Oxman AD, Akl EA, Kunz R, Vist G, Brozek J, et al. GRADE guidelines: 1.  
16 494 Introduction-GRADE evidence profiles and summary of findings tables. *J Clin Epidemiol*.  
17 495 2011;64(4):383-94.  
18  
19 496 19. Guyatt GH, Oxman AD, Kunz R, Atkins D, Brozek J, Vist G, et al. GRADE guidelines:  
20 497 2. Framing the question and deciding on important outcomes. *J Clin Epidemiol*.  
21 498 2011;64(4):395-400.  
22  
23 499 20. Atkins D, Eccles M, Flottorp S, Guyatt GH, Henry D, Hill S, et al. Systems for grading  
24 500 the quality of evidence and the strength of recommendations I: critical appraisal of existing  
25 501 approaches The GRADE Working Group. *BMC Health Serv Res*. 2004;4(1):38.  
26  
27 502 21. Reddel HK, Taylor DR, Bateman ED, Boulet LP, Boushey HA, Busse WW, et al. An  
28 503 official American Thoracic Society/European Respiratory Society statement: asthma control  
29 504 and exacerbations: standardizing endpoints for clinical asthma trials and clinical practice. *Am*  
30 505 *J Respir Crit Care Med*. 2009;180(1):59-99.  
31  
32 506 22. Schatz M, Kosinski M, Yaras AS, Hanlon J, Watson ME, Jhingran P. The minimally  
33 507 important difference of the Asthma Control Test. *J Allergy Clin Immunol*. 2009;124(4):719-23  
34 508 e1.  
35  
36 509 23. Vasbinder EC, Janssens HM, Rutten-van Molken MP, van Dijk L, de Winter BC, de  
37 510 Groot RC, et al. e-Monitoring of Asthma Therapy to Improve Compliance in children using a  
38 511 real-time medication monitoring system (RTMM): the e-MATIC study protocol. *BMC medical*  
39 512 *informatics and decision making*. 2013;13:38.  
40  
41 513 24. Niu C, Wang J, Huang J, Lue K, Chen W. Efficacy and safety of sublingual  
42 514 immunotherapy with high dose house dust mite extract in asthmatic children: a multicenter  
43 515 randomized double-blind, and placebo-controlled study. *J Allergy Clin Immunol*.  
44 516 2004;113(Suppl 2):S108.  
45  
46 517 25. Shea BJ, Grimshaw JM, Wells GA, Boers M, Andersson N, Hamel C, et al.  
47 518 Development of AMSTAR: a measurement tool to assess the methodological quality of  
48 519 systematic reviews. *BMC Med Res Methodol*. 2007;7:10.  
49  
50  
51  
52  
53  
54  
55  
56  
57  
58  
59  
60



- 1  
2  
3 520 26. Jadad AR, Moore RA, Carroll D, Jenkinson C, Reynolds DJ, Gavaghan DJ, et al.  
4 521 Assessing the quality of reports of randomized clinical trials: is blinding necessary? *Control*  
5 522 *Clin Trials*. 1996;17(1):1-12.  
6  
7 523 27. Alzakar RH, Alsamarai AM. Efficacy of immunotherapy for treatment of allergic  
8 524 asthma in children. *Allergy Asthma Proc*. 2010;31(4):324-30.  
9  
10 525 28. Antunez C, Mayorga C, Corzo JL, Jurado A, Torres MJ. Two year follow-up of  
11 526 immunological response in mite-allergic children treated with sublingual immunotherapy.  
12 527 Comparison with subcutaneous administration. *Pediatr Allergy Immunol*. 2008;19(3):210-8.  
13  
14 528 29. Calamita Z, Saconato H, Pela AB, Atallah AN. Efficacy of sublingual immunotherapy  
15 529 in asthma: systematic review of randomized-clinical trials using the Cochrane Collaboration  
16 530 method. *Allergy*. 2006;61(10):1162-72.  
17  
18 531 30. Hoeks SB, de Groot H, Hoekstra MO. [Sublingual immunotherapy in children with  
19 532 asthma or rhinoconjunctivitis: not enough evidence because of poor quality of the studies; a  
20 533 systematic review of literature]. *Ned Tijdschr Geneeskd*. 2008;152(5):261-8.  
21  
22 534 31. Keles S, Karakoc-Aydiner E, Ozen A, Izgi AG, Tevetoglu A, Akkoc T, et al. A novel  
23 535 approach in allergen-specific immunotherapy: combination of sublingual and subcutaneous  
24 536 routes. *J Allergy Clin Immunol*. 2011;128(4):808-15 e7.  
25  
26 537 32. Penagos M, Passalacqua G, Compalati E, Baena-Cagnani CE, Orozco S, Pedroza A,  
27 538 et al. Metaanalysis of the efficacy of sublingual immunotherapy in the treatment of allergic  
28 539 asthma in pediatric patients, 3 to 18 years of age. *Chest*. 2008;133(3):599-609.  
29  
30 540 33. Sopo SM, Macchiaiolo M, Zorzi G, Tripodi S. Sublingual immunotherapy in asthma  
31 541 and rhinoconjunctivitis; systematic review of paediatric literature. *Arch Dis Child*.  
32 542 2004;89(7):620-4.  
33  
34 543 34. Tsai TC, Lu JH, Chen SJ, Tang RB. Clinical efficacy of house dust mite-specific  
35 544 immunotherapy in asthmatic children. *Pediatr Neonatol*. 2010;51(1):14-8.  
36  
37 545 35. Zielen S, Kardos P, Madonini E. Steroid-sparing effects with allergen-specific  
38 546 immunotherapy in children with asthma: a randomized controlled trial. *J Allergy Clin*  
39 547 *Immunol*. 2010;126(5):942-9.  
40  
41 548 36. Hui Y, Li L, Qian J, Guo Y, Zhang X, Zhang X. Efficacy analysis of three-year  
42 549 subcutaneous SQ-standardized specific immunotherapy in house dust mite-allergic children  
43 550 with asthma. *Exp Ther Med*. 2014;7(3):630-4.  
44  
45 551 37. Lozano J, Cruz MJ, Piquer M, Giner MT, Plaza AM. Assessing the efficacy of  
46 552 immunotherapy with a glutaraldehyde-modified house dust mite extract in children by  
47 553 monitoring changes in clinical parameters and inflammatory markers in exhaled breath. *Int*  
48 554 *Arch Allergy Immunol*. 2014;165(2):140-7.  
49  
50  
51  
52  
53  
54  
55  
56  
57  
58  
59  
60

- 1  
2  
3 555 38. Adkinson NF, Jr., Eggleston PA, Eney D, Goldstein EO, Schuberth KC, Bacon JR, et  
4 556 al. A controlled trial of immunotherapy for asthma in allergic children. *N Engl J Med.*  
5 557 1997;336(5):324-31.  
6  
7 558 39. Altintas D, Akmanlar N, Guneser S, Burgut R, Yilmaz M, Bugdayci R, et al.  
8 559 Comparison between the use of adsorbed and aqueous immunotherapy material in  
9 560 *Dermatophagoides pteronyssinus* sensitive asthmatic children. *Allergol Immunopathol*  
10 561 (Madr). 1999;27(6):309-17.  
11 562 40. Dreborg S, Agrell B, Foucard T, Kjellman NI, Koivikko A, Nilsson S. A double-blind,  
12 563 multicenter immunotherapy trial in children, using a purified and standardized *Cladosporium*  
13 564 *herbarum* preparation. I. Clinical results. *Allergy.* 1986;41(2):131-40.  
14 565 41. Hill DJ, Hosking CS, Shelton MJ, Turner MW. Failure of hyposensitisation in  
15 566 treatment of children with grass-pollen asthma. *Br Med J (Clin Res Ed).* 1982;284(6312):306-  
16 567 9.  
17 568 42. Johnstone DE, Crump L. Value of hyposensitization therapy for perennial bronchial  
18 569 asthma in children. *Pediatrics.* 1961;27:39-44.  
19 570 43. Johnstone DE, Dutton A. The value of hyposensitization therapy for bronchial asthma  
20 571 in children--a 14-year study. *Pediatrics.* 1968;42(5):793-802.  
21 572 44. Price JF, Warner JO, Hey EN, Turner MW, Soothill JF. A controlled trial of  
22 573 hyposensitization with adsorbed tyrosine *Dermatophagoides pteronyssinus* antigen in  
23 574 childhood asthma: in vivo aspects. *Clin Allergy.* 1984;14(3):209-19.  
24 575 45. Valovirta E, Koivikko A, Vanto T, Viander M, Ingeman L. Immunotherapy in allergy to  
25 576 dog: a double-blind clinical study. *Ann Allergy.* 1984;53(1):85-8.  
26 577 46. Warner JO, Price JF, Soothill JF, Hey EN. Controlled trial of hyposensitisation to  
27 578 *Dermatophagoides pteronyssinus* in children with asthma. *Lancet.* 1978;2(8096):912-5.  
28 579 47. Bahceciler NN, Isik U, Barlan IB, Basaran MM. Efficacy of sublingual immunotherapy  
29 580 in children with asthma and rhinitis: a double-blind, placebo-controlled study. *Pediatr*  
30 581 *Pulmonol.* 2001;32(1):49-55.  
31 582 48. Hirsch T, Sahn M, Leupold W. Double-blind placebo-controlled study of sublingual  
32 583 immunotherapy with house dust mite extract (D.pt.) in children. *Pediatr Allergy Immunol.*  
33 584 1997;8(1):21-7.  
34 585 49. Novembre E, Marano E, Bernardini R. Sublingual immunotherapy in the treatment of  
35 586 allergic asthma in children: a controlled study. *Riv Ital Pediatr (IJP).* 1991;17:75-8.  
36 587 50. Pajno GB, Vita D, Parmiani S, Caminiti L, La Grutta S, Barberio G. Impact of  
37 588 sublingual immunotherapy on seasonal asthma and skin reactivity in children allergic to  
38 589 *Parietaria pollen* treated with inhaled fluticasone propionate. *Clin Exp Allergy.*  
39 590 2003;33(12):1641-7.  
40  
41  
42  
43  
44  
45  
46  
47  
48  
49  
50  
51  
52  
53  
54  
55  
56  
57  
58  
59  
60



- 1  
2  
3 591 51. Pajno GB, Passalacqua G, Vita D, Caminiti L, Parmiani S, Barberio G. Sublingual  
4 592 immunotherapy abrogates seasonal bronchial hyperresponsiveness in children with  
5 593 Parietaria-induced respiratory allergy: a randomized controlled trial. *Allergy*. 2004;59(8):883-  
6 594 7.  
7  
8 595 52. Rodriguez Santos O. [Sublingual immunotherapy with allergenic extract of  
9 596 *Dermatophagoides pteronyssinus* in asthmatic children]. *Rev Alerg Mex*. 2004;51(5):177-80.  
10  
11 597 53. Rolinck-Werninghaus C, Wolf H, Liebke C, Baars JC, Lange J, Kopp MV, et al. A  
12 598 prospective, randomized, double-blind, placebo-controlled multi-centre study on the efficacy  
13 599 and safety of sublingual immunotherapy (SLIT) in children with seasonal allergic  
14 600 rhinoconjunctivitis to grass pollen. *Allergy*. 2004;59(12):1285-93.  
15  
16 601 54. Yuksel H, Tanac R, Gousseinov A, Demir E. Sublingual immunotherapy and influence  
17 602 on urinary leukotrienes in seasonal pediatric allergy. *J investig Allergol Clin Immunol*.  
18 603 1999;9:305-13.  
19  
20 604 55. Caffarelli C, Sensi LG, Marcucci F. Preseasonal local allergoid immunotherapy to  
21 605 grass pollen in children: a double-blind, placebo-controlled, randomized trial. *Allergy*.  
22 606 2000;55:1142-7.  
23  
24 607 56. Ippoliti F, De Santis W, Volterrani A, Lenti L, Canitano N, Lucarelli S, et al.  
25 608 Immunomodulation during sublingual therapy in allergic children. *Pediatr Allergy Immunol*.  
26 609 2003;14(3):216-21.  
27  
28 610 57. Niu CK, Chen WY, Huang JL, Lue KH, Wang JY. Efficacy of sublingual  
29 611 immunotherapy with high-dose mite extracts in asthma: a multi-center, double-blind,  
30 612 randomized, and placebo-controlled study in Taiwan. *Respir Med*. 2006;100(8):1374-83.  
31  
32 613 58. Pajno GB, Morabito L, Barberio G, Parmiani S. Clinical and immunologic effects of  
33 614 long-term sublingual immunotherapy in asthmatic children sensitized to mites: a double-blind,  
34 615 placebo-controlled study. *Allergy*. 2000;55(9):842-9.  
35  
36 616 59. Tari MG, Mancino M, Monti G. Efficacy of sublingual immunotherapy in patients with  
37 617 rhinitis and asthma due to house dust mite. A double-blind study. *Allergol Immunopathol*  
38 618 (Madr). 1990;18(5):277-84.  
39  
40 619 60. Vourdas D, Syrigou E, Potamianou P, Carat F, Batard T, André C, et al. Double-blind,  
41 620 placebo-controlled evaluation of sublingual immunotherapy with standardized olive pollen  
42 621 extract in pediatric patients with allergic rhinoconjunctivitis and mild asthma due to olive  
43 622 pollen sensitization. *Allergy* 1998; 53: 662-72.  
44  
45 623 61. van Essen-Zandvliet EE, Hughes MD, Waalkens HJ, Duiverman EJ, Pocock SJ,  
46 624 Kerrebijn KF. Effects of 22 months of treatment with inhaled corticosteroids and/or beta-2-  
47 625 agonists on lung function, airway responsiveness, and symptoms in children with asthma.  
48 626 The Dutch Chronic Non-specific Lung Disease Study Group. *Am Rev Respir Dis*.  
49 627 1992;146(3):547-54.  
50  
51  
52  
53  
54  
55  
56  
57  
58  
59  
60

- 1  
2  
3 628 62. Cuello Garcia CA, Pachecho Alvaredo KP, Pérez Gaxiola G. Grading  
4 629 recommendations in clinical practice guidelines: randomised experimental evaluation of four  
5 630 different systems. Arch Dis Child 2011; 96: 723-8.  
6  
7 631 63. Canonica GW, Bousquet J, Casale T, Lockey RF, Baena-Cagnani CE, Pawankar R,  
8 632 et al. Sub-lingual immunotherapy: world allergy organization position paper 2009. World  
9 633 Allergy Organ J. 2009;2(11):233-8  
10  
11  
12  
13  
14  
15  
16  
17  
18  
19  
20  
21  
22  
23  
24  
25  
26  
27  
28  
29  
30  
31  
32  
33  
34  
35  
36  
37  
38  
39  
40  
41  
42  
43  
44  
45  
46  
47  
48  
49  
50  
51  
52  
53  
54  
55  
56  
57  
58  
59  
60

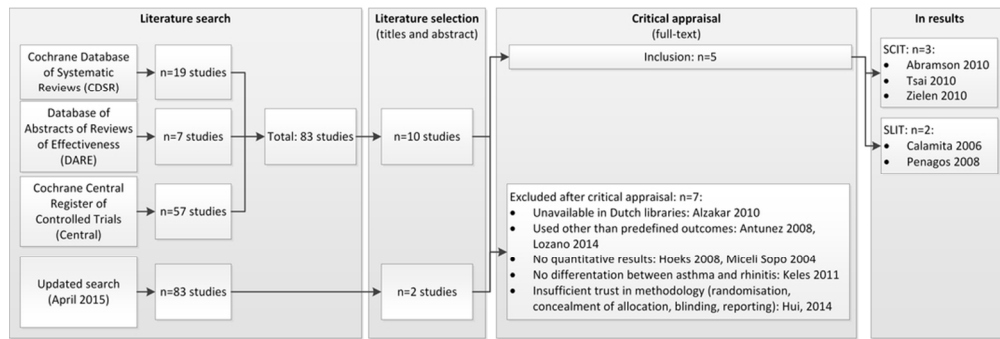

91x30mm (300 x 300 DPI)

peer review only

1  
2  
3  
4  
5  
6  
7  
8  
9  
10  
11  
12  
13  
14  
15  
16  
17  
18  
19  
20  
21  
22  
23  
24  
25  
26  
27  
28  
29  
30  
31  
32  
33  
34  
35  
36  
37  
38  
39  
40  
41  
42  
43  
44  
45  
46  
47  
48  
49  
50  
51  
52  
53  
54  
55  
56  
57  
58  
59  
60

1  
2  
3  
4  
5  
6  
7  
8  
9  
10  
11  
12  
13  
14  
15  
16  
17  
18  
19  
20  
21  
22  
23  
24  
25  
26  
27  
28  
29  
30  
31  
32  
33  
34  
35  
36  
37  
38  
39  
40  
41  
42  
43  
44  
45  
46  
47  
48  
49  
50  
51  
52  
53  
54  
55  
56  
57  
58  
59  
60

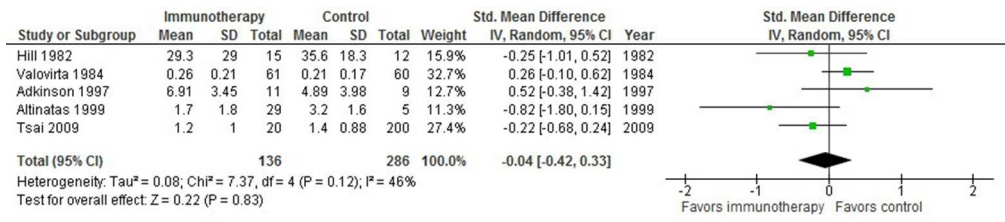

233x50mm (96 x 96 DPI)

or peer review only

1  
2  
3  
4  
5  
6  
7  
8  
9  
10  
11  
12  
13  
14  
15  
16  
17  
18  
19  
20  
21  
22  
23  
24  
25  
26  
27  
28  
29  
30  
31  
32  
33  
34  
35  
36  
37  
38  
39  
40  
41  
42  
43  
44  
45  
46  
47  
48  
49  
50  
51  
52  
53  
54  
55  
56  
57  
58  
59  
60

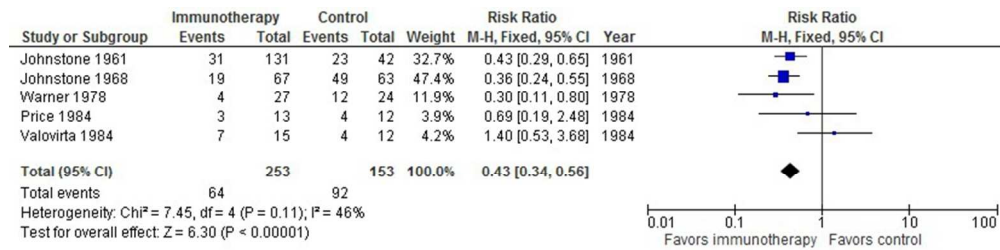

219x55mm (96 x 96 DPI)

For peer review only

**Table E1. Literature search**

| <b>Search Cochrane Databases of Systematic Reviews, Database of Abstracts of Reviews of Effectiveness, and Central; Literature search 2015, April 25<sup>th</sup></b> |                                     |
|-----------------------------------------------------------------------------------------------------------------------------------------------------------------------|-------------------------------------|
| 1.                                                                                                                                                                    | "asthmazoeacties jan 2012".ti. (0)  |
| 2.                                                                                                                                                                    | asthma.tw. (14671)                  |
| 3.                                                                                                                                                                    | Bronchial Spasm.tw. (15)            |
| 4.                                                                                                                                                                    | asthma*.tw. (17541)                 |
| 5.                                                                                                                                                                    | wheez*.tw. (869)                    |
| 6.                                                                                                                                                                    | bronchospas*.tw. (777)              |
| 7.                                                                                                                                                                    | (bronch* adj8 spas*).tw. (52)       |
| 8.                                                                                                                                                                    | bronchoconstrict*.tw. (1663)        |
| 9.                                                                                                                                                                    | (bronch* adj8 constrict*).tw. (71)  |
| 10.                                                                                                                                                                   | airway* inflammation*.tw. (704)     |
| 11.                                                                                                                                                                   | or/2-10 (18894)                     |
| 12.                                                                                                                                                                   | immunotherap*.kw,tw. (2803)         |
| 13.                                                                                                                                                                   | 11 and 12 (473)                     |
| 14.                                                                                                                                                                   | subcutaneou*.kw,tw. (8020)          |
| 15.                                                                                                                                                                   | 12 and 14 (259)                     |
| 16.                                                                                                                                                                   | 15 (259)                            |
| 17.                                                                                                                                                                   | limit 16 to yr="2008 -Current" (57) |
| <b>Results</b>                                                                                                                                                        |                                     |
| Cochrane Databases of Systematic Reviews                                                                                                                              | 19                                  |
| Database of Abstracts of Reviews of Effectiveness                                                                                                                     | 7                                   |
| Cochrane Central Trials Register                                                                                                                                      | 57                                  |

Table E2. Evidence table systematic reviews (SCIT + SLIT)

|                                    | Abramson, 2010 <sup>26</sup>                                                                                                                                                                                                                 | Calamita, 2006 <sup>29</sup>                                                                                                                                                                         | Penagos, 2008 <sup>32</sup>                                                                                                                                                                                                                                                           |
|------------------------------------|----------------------------------------------------------------------------------------------------------------------------------------------------------------------------------------------------------------------------------------------|------------------------------------------------------------------------------------------------------------------------------------------------------------------------------------------------------|---------------------------------------------------------------------------------------------------------------------------------------------------------------------------------------------------------------------------------------------------------------------------------------|
| <b>Study design</b>                | Cochrane systematic review, consisting of 90 RCT's. 14 RCT's were carried out in children only; 24 were done in children and adults. The total study population (children and adults) consisted of 3.792 patients (of whom 3.459 had asthma) | Systematic review, consisting of 25 RCT's. Only 9 RCT's were carried out in children only. The total study population consisted of 1.706 patients (adults and children, with asthma and/or rhinitis) | Systematic review, consisting of 9 RCT's, all carried out in children. The total study population comprised 441 patients with asthma (seasonal, mild, moderate, and persistent)                                                                                                       |
| <b>Age (mean)</b>                  | Not specified, variation between included studies                                                                                                                                                                                            | Not specified, there is a limited description of the characteristics of the included studies                                                                                                         | Range specified per study, total range: 4-17 years                                                                                                                                                                                                                                    |
| <b>Setting (in RCT's)</b>          | -                                                                                                                                                                                                                                            | -                                                                                                                                                                                                    | -                                                                                                                                                                                                                                                                                     |
| <b>Diagnosis (asthma/rhinitis)</b> | Asthma                                                                                                                                                                                                                                       | Asthma and rhinitis                                                                                                                                                                                  | Asthma                                                                                                                                                                                                                                                                                |
| <b>Eligibility criteria</b>        | RCT's, patients with asthma, allergen specific subcutaneous immunotherapy (administration of extracts of house dust mites, pollens, animal danders or molds, chemically modified allergoids or antigen-antibody complexes)                   | RCT's, double blinded, and open studies, patients with asthma and/or rhinitis, sublingual immunotherapy (with or without swallowing, all types of allergen, all doses, all lengths of treatment)     | RCT's, double blinded, placebo controlled, patients ≤ 18 years, with a history of allergic asthma, with identified causal allergen, and proven IgE sensitization. Sublingual immunotherapy (with or without swallowing, all types of allergen, all doses, all durations of treatment) |
| <b>Type of immunotherapy</b>       | Subcutaneous immunotherapy (variation of allergen abstracts in different included studies)                                                                                                                                                   | Sublingual immunotherapy, mainly pollen and mite                                                                                                                                                     | Sublingual immunotherapy, mainly mites                                                                                                                                                                                                                                                |
| <b>Intervention</b>                | Subcutaneous immunotherapy                                                                                                                                                                                                                   | Sublingual immunotherapy, mainly pollen and mite                                                                                                                                                     | Sublingual immunotherapy (mainly mites, further: <i>O europaea</i> , <i>Holcus</i> , <i>P pretense</i> <i>Dermatophagoides pteronyssinus</i> , grass mix), great variation in duration, range: 3-32 months                                                                            |
| <b>Control</b>                     | Placebo                                                                                                                                                                                                                                      | Placebo                                                                                                                                                                                              | Placebo                                                                                                                                                                                                                                                                               |
| <b>Primary outcomes</b>            | Asthmatic symptoms<br>Asthma medication requirements<br>Lung function<br>Nonspecific bronchial hyper-reactivity<br>Allergen specific bronchial hyper-reactivity                                                                              | Asthmatic symptoms (symptom score)<br>Asthmatic medication requirement<br>Respiratory function tests (PEFR, FEV <sub>1</sub> , FEF25-75%)<br>Nonspecific bronchial provocation<br>Adverse effects    | Asthma symptoms<br>Medication scores                                                                                                                                                                                                                                                  |
| <b>Secondary outcomes</b>          | Local reactions<br>Systemic reactions                                                                                                                                                                                                        | -                                                                                                                                                                                                    |                                                                                                                                                                                                                                                                                       |
| <b>Comment</b>                     | The results have not been presented separately for children in the review. We                                                                                                                                                                | The authors mentioned they used the Cochrane Collaboration method                                                                                                                                    | -                                                                                                                                                                                                                                                                                     |

1  
2  
3  
4  
5  
6  
7  
8  
9  
10  
11  
12  
13  
14  
15  
16  
17  
18  
19  
20  
21  
22  
23  
24  
25  
26  
27  
28  
29  
30  
31  
32  
33  
34  
35  
36  
37  
38  
39  
40  
41  
42  
43  
44  
45  
46  
47  
48  
49

|  |                                       |  |  |
|--|---------------------------------------|--|--|
|  | conducted new suitable meta-analyses. |  |  |
|--|---------------------------------------|--|--|

Abbreviations: FEF25-75: maximum mid expiratory flow; FEV<sub>1</sub>: forced expiratory volume in 1 second; PEFR: peak expiratory flow rate; RCT: randomized controlled trial; SCIT: subcutaneous immunotherapy; SLIT: sublingual immunotherapy

For peer review only



Table E3. Evidence table SCIT studies

| Author, date                 | Study design                                                                                   | Setting    | Eligibility | Participants (number, gender, age, and descriptive)                                                     | Asthma type,* severity (e.g. on ICS?)                                                        | Allergy type (mono/multi, allergens,                        | Intervention (type, dose, duration)                                                                                         | Control | Follow-up (from start | Outcomes                                                                                            | Results reported by authorst                                                                    | Critical appraisal‡                                                                         | Comments                                                                                                          |
|------------------------------|------------------------------------------------------------------------------------------------|------------|-------------|---------------------------------------------------------------------------------------------------------|----------------------------------------------------------------------------------------------|-------------------------------------------------------------|-----------------------------------------------------------------------------------------------------------------------------|---------|-----------------------|-----------------------------------------------------------------------------------------------------|-------------------------------------------------------------------------------------------------|---------------------------------------------------------------------------------------------|-------------------------------------------------------------------------------------------------------------------|
| Adkinson, 1997 <sup>38</sup> | Double blind, placebo controlled, parallel group RCT<br>Placebo caramelized saline + histamine | ?          |             | 121 allergic children with perennial asthma<br>Mean age 9.2 (range 5.4 to 14) years, 79% boys           | Perennial asthma<br>41% ICS, 2% systemic                                                     | 80% dust mite, 77% ragweed, 69% rye grass                   | Subcutaneous multiple allergen immunotherapy<br>Median 6 (range 2 to 7) allergen extracts                                   | Placebo | ?                     | Symptom scores<br>Medication scores<br>PEF rates<br>Nonspecific BHR (methacholin FEV <sub>1</sub> ) | SCIT not useful in moderate to severe perennial allergic asthma                                 | Study useful, however low rate of ICS                                                       | Allocation concealment unclear                                                                                    |
| Altintas, 1999 <sup>39</sup> | Open placebo controlled RCT multiple groups                                                    | university |             | 34 poorly controlled mild to moderate asthmatics aged 4 to 18 years; 30 patients in 3 groups, 4 placebo | ICS use not specified, no medical details on asthma                                          | Mono-sensitization<br><i>Dermatophagoides pteronyssinus</i> | Subcutaneous immunotherapy with adsorbed or aqueous <i>Dermatophagoides pteronyssinus</i> extracts (in different dilutions) | Placebo |                       | Symptom medication score<br>IgE and IgG4 level<br>Bronchial provocation tests                       | SCIT is useful and safe; no conclusion on asthma                                                | Study not useful<br>No data on ICS,                                                         | Allocation concealment unclear<br>Study designed to compare 3 different abstracts of immunotherapy                |
| Dreborg, 1986 <sup>40</sup>  | RCT, double blind<br>Freeze dried caramelized histamine placebo                                | European   |             | 30 children with <i>Cladosporium</i> allergy, aged 5 to 17 years                                        | Clinical history suggesting mold-induced asthma and/or rhinoconjunctivitis<br>ICS not stated | <i>Cladosporium</i> allergy                                 | 10 months <i>Cladosporium</i> subcutaneous immunotherapy<br>Or placebo                                                      | Placebo |                       | Symptoms<br>Medication<br>PEF (no SD reported)<br>Allergen specific BHR                             | Decrease in medication score, but not in symptom score<br>Lower medication score in verum group | Study not useful<br>No information on asthma medication<br>No fixed study medication scheme | Allocation concealment unclear<br>Asthma diagnosis not specified, (worsening of asthma in the <i>Cladosporium</i> |

|                                      |                                                             |                                |                                                                                                                        |                                                               |  |                                                                                        |         |  |                                                                       |                                                                                                                                                               |                                                           |                                                                                                                              |
|--------------------------------------|-------------------------------------------------------------|--------------------------------|------------------------------------------------------------------------------------------------------------------------|---------------------------------------------------------------|--|----------------------------------------------------------------------------------------|---------|--|-----------------------------------------------------------------------|---------------------------------------------------------------------------------------------------------------------------------------------------------------|-----------------------------------------------------------|------------------------------------------------------------------------------------------------------------------------------|
|                                      |                                                             |                                |                                                                                                                        |                                                               |  |                                                                                        |         |  |                                                                       |                                                                                                                                                               |                                                           | season)                                                                                                                      |
| <b>Hill, 1982</b> <sup>41</sup>      | Single blind RCT, rye grass pollen placebo                  | University Australia           | 20 asthmatic children, aged 9 to 14 years, with rye grass pollen allergy, positive at bronchoprovocation               | ICS N=1 beclomethas on N=8 cromoglycate                       |  | Subcutaneous immunotherapy with aqueous rye grass pollen extract                       | Placebo |  | Symptoms Medications (medians only reported, no SD)                   | no evidence that limited hyposensitization with a pollen extract is of any clinical benefit in seasonal asthma despite evidence of an immunological response. | Study not useful Primary outcome = IgE and IgG levels     | No allocation concealment                                                                                                    |
| <b>Johnstone, 1961</b> <sup>42</sup> | RCT, double blind, 4-year follow up Buffered saline control | United States general hospital | 173 children with perennial asthma Severity = number of days of wheeze/year Placebo: n=41                              | No medication mentioned at all, no medication scores          |  | Subcutaneous immunotherapy with relevant allergen extracts, administered by 3 regimens | Placebo |  | Asthma symptoms reported by mother Number of new allergies developing | Less new allergies developing Less symptoms and asthma attacks in the last year in the group 4                                                                | Study not useful No asthma medication scores              | Allocation concealment unclear 4 different groups, 1 placebo (n=41) Group 2-4 different strength SCIT Last year single blind |
| <b>Johnstone, 1968</b> <sup>43</sup> | RCT, double blind Buffered saline control                   |                                | 130 children with perennial asthma; Severity = number of days of wheeze/year RCT, double blind Buffered saline control | No medication mentioned, no medication scores                 |  | Subcutaneous immunotherapy with relevant allergens administered by 3 regimens          | Placebo |  | Asthma symptoms reported by mother                                    | More children in SCIT group high dose overgrowing asthma at the age of 16 than placebo                                                                        | Study not useful No asthma medication scores              | Allocation concealment unclear 14-years follow up of Johnstone 1961                                                          |
| <b>Price, 1984</b> <sup>44</sup>     | RCT, double blind Saline placebo control                    |                                | 25 children with perennial asthma, aged 5 to 15 years                                                                  | Asthma severity not specified asthma medication not specified |  | Subcutaneous immunotherapy with <i>Dermatophagoides pteronyssinus</i>                  | Placebo |  | Symptoms Medication Lung function Bronchoprovocation                  | Loss of late reaction on bronchoprovocation Only one out of 6 children with                                                                                   | Study not useful Bronchoprovocation is surrogate outcome; | Continuation of study by Warner 1978 for second year with                                                                    |

|                                                                                                                                                                                                             |                                      |                                                     |                             |                                                                                                                                          |                                                                                            |                                                             |                                                                                                                                                                                                                                                                                                                                                    |                 |                           |                                                                                                                                                 |                                                                                                                                                                                                                                                                                                                                                                                               |                                                                   |                                                                           |
|-------------------------------------------------------------------------------------------------------------------------------------------------------------------------------------------------------------|--------------------------------------|-----------------------------------------------------|-----------------------------|------------------------------------------------------------------------------------------------------------------------------------------|--------------------------------------------------------------------------------------------|-------------------------------------------------------------|----------------------------------------------------------------------------------------------------------------------------------------------------------------------------------------------------------------------------------------------------------------------------------------------------------------------------------------------------|-----------------|---------------------------|-------------------------------------------------------------------------------------------------------------------------------------------------|-----------------------------------------------------------------------------------------------------------------------------------------------------------------------------------------------------------------------------------------------------------------------------------------------------------------------------------------------------------------------------------------------|-------------------------------------------------------------------|---------------------------------------------------------------------------|
|                                                                                                                                                                                                             |                                      |                                                     |                             |                                                                                                                                          |                                                                                            | extracts                                                    |                                                                                                                                                                                                                                                                                                                                                    |                 |                           | severe asthma improved                                                                                                                          |                                                                                                                                                                                                                                                                                                                                                                                               | placebo group crossed over to active immunotherapy                |                                                                           |
| 1<br>2<br>3<br>4<br>5<br>6<br>7<br>8<br>9<br>10<br>11<br>12<br>13<br>14<br>15<br>16<br>17<br>18<br>19<br>20<br>21<br>22<br>23<br>24<br>25<br>26<br>27<br>28<br>29<br>30<br>31<br>32<br>33<br>34<br>35<br>36 | <b>Tsai, 2010</b> <sup>34</sup>      | RCT, no blinding, no intervention in control group  | University hospital, Taiwan | 40 children (21 boys), aged 5-14 years (average 8,5) >1 year moderate persistent to severe asthma, all monosensitized to house dust mite | Moderate persistent to severe asthma, using daily medication, most patient at least on ICS | House dust mite, diagnosed by SPT or specific antibody test | Subcutaneous injections of extracts of <i>Dermatophagoides pteronyssinus</i> and <i>Dermatophagoides farina</i> (10000 AU/ml), initial dose 0,5AU/ml once a week. Dosage was increased weekly by 25-100% to reach optimal maintenance dose, with respect to local or systemic reaction. Maintenance therapy every 2 weeks during at least 3 months | No intervention | 6 months (last follow-up) | Primary: Medication score (5 point scale, modified GINA)<br>Secondary: PEF, asthma symptom score, number of contacts with health care providers | Mean medication score declined after 6 months in both groups; no significant differences between group differences. Both groups had reduction of asthma symptoms after 6 months, but no between group differences. There was no difference in PEF. Patients in the intervention group had more clinical visits than the control group, but no difference in emergency room or hospitalization | Very few patients, no blinding, randomization procedure not clear |                                                                           |
| 37<br>38<br>39<br>40<br>41<br>42<br>43<br>44<br>45<br>46<br>47<br>48<br>49                                                                                                                                  | <b>Valovirta, 1984</b> <sup>45</sup> | RCT, double blind Caramel histamine placebo control | ?                           | 27 asthmatic children allergic to dog dander, aged 5 to 18 years                                                                         | Asthma severity not specified asthma medication not specified                              |                                                             | Subcutaneous immunotherapy with aluminium hydroxide bound dog dander extract                                                                                                                                                                                                                                                                       | Placebo         |                           | Symptoms Allergen specific BHR                                                                                                                  | The decrease in bronchial sensitivity was less marked than that in conjunctival sensitivity and statistically not                                                                                                                                                                                                                                                                             | Study not useful No asthma medication scores                      | Primary outcome dog dander sensitivity, not asthma 2 authors connected to |

|                            |                                            |                            |                                                                                                                                                     |                                       |                                                      |                                                                                                                                                                                                                                                                                        |                                                     |         |                                                                                                                                                                       |                                                                                                                                                                                    |                                                                                                                   |                                                           |
|----------------------------|--------------------------------------------|----------------------------|-----------------------------------------------------------------------------------------------------------------------------------------------------|---------------------------------------|------------------------------------------------------|----------------------------------------------------------------------------------------------------------------------------------------------------------------------------------------------------------------------------------------------------------------------------------------|-----------------------------------------------------|---------|-----------------------------------------------------------------------------------------------------------------------------------------------------------------------|------------------------------------------------------------------------------------------------------------------------------------------------------------------------------------|-------------------------------------------------------------------------------------------------------------------|-----------------------------------------------------------|
|                            |                                            |                            |                                                                                                                                                     |                                       |                                                      |                                                                                                                                                                                                                                                                                        |                                                     |         |                                                                                                                                                                       | significant                                                                                                                                                                        |                                                                                                                   | pharmaceutical company                                    |
| Warner, 1978 <sup>46</sup> | RCT, double blind Tyrosine placebo control | University, United Kingdom | 51 asthmatic children, aged 5 to 14 years, with positive <i>Dermatophagoides pteronyssinus</i> challenge                                            | ICS n=12, cromoglycate n=24 SABA n=14 | House dust mite, SPT and bronchoprovocation positive | Subcutaneous immunotherapy with tyrosine adsorbed <i>Dermatophagoides pteronyssinus</i> extracts                                                                                                                                                                                       | Placebo                                             | 1 year  | Symptoms Medication Lung function (PEF, FEV 0.75) Allergen specific BHR                                                                                               | Less asthma medication in active group, but no difference in control or immediate response on bronchoprovocation                                                                   | Useful; however incomparable low level of ICS                                                                     | Allocation concealment unclear No fixed medication scheme |
| Zielen, 2010 <sup>35</sup> | RCT, single blind, no control intervention | Multinational, multicenter | 56 children with asthma GINA treatment II-III, on ICS, house dust mite (positive SPT), positive conjunctival provocation, significant RAST response | All on ICS, GINA II-III treatment     | House dust mite SPT, provocative                     | SCIT with allergens extracted from <i>Dermatophagoides pteronyssinus</i> in 2 strengths: A: 1000 TU/ml; B: 10000 TU/ml. Initial therapy: weekly increasing doses strength A, followed by B. After reaching max individually tolerated dose, dosage intervals were increased to 6 weeks | No immunotherapy, only maintenance therapy with ICS | 2 years | Primary: change in ICS dose steps to achieve asthma control Secondary: change in pre-bronchodilator y PEF, immunologic changes, nonspecific bronchial hyperreactivity | Less asthma medication in SCIT group as compared to control group, no change in asthma control, higher increase in PEF in intervention group. Adverse events in 97% in both groups | Block randomization. Multicenter, multinational is possible bicenter, binational. Conflict of interest in authors |                                                           |

Abbreviations: AU: dosing units; BHR: bronchohyperreactivity; FEV1: forced expiratory volume in 1 second; GINA: Global Initiative for Asthma; ICS: inhaled corticosteroids; ml: millilitres; n: number; PEF: peak expiratory flow; RAST: radioallergent sorbent test; RCT: randomized controlled trial; SABA: short-acting beta agonist; SCIT: subcutaneous immunotherapy; SD: standard deviation; SPT: skin prick test; TU: dosing units

\* Doctors diagnosed asthma? Stable/seasonal asthma? Mild/severe asthma?

† Asthma symptoms, allergy/rhinitis symptoms, asthma control, (disease specific) quality of life, exacerbations, lung function, adverse reactions and/or complications

‡ e.g. randomization procedure, blinding, risk of bias

Table E4. Evidence table selected RCT's in children included in systematic reviews Calamita et al. and Penagos et al. (SLIT)

| Author, date                            | Study design                                     | Setting                                  | Eligibility criteria                                                                                                                                   | Participants (number, gender, age, and Asthma type*, severity (e.g. on ICS?) | Allergy type (mono/multi, allergens, proven)                                                            | Intervention (type, dose, duration)                              | Control                                                                                            | Follow-up (from start trial) | Outcomes  | Results†                                                                                                               | Critical appraisal‡                                                                                                              | Comments                                                                                                                                                       |                                                                                                                    |
|-----------------------------------------|--------------------------------------------------|------------------------------------------|--------------------------------------------------------------------------------------------------------------------------------------------------------|------------------------------------------------------------------------------|---------------------------------------------------------------------------------------------------------|------------------------------------------------------------------|----------------------------------------------------------------------------------------------------|------------------------------|-----------|------------------------------------------------------------------------------------------------------------------------|----------------------------------------------------------------------------------------------------------------------------------|----------------------------------------------------------------------------------------------------------------------------------------------------------------|--------------------------------------------------------------------------------------------------------------------|
| <b>Bahceci et al 2001</b> <sup>47</sup> | double-blind placebo - controlled SLIT drops HDM | Mono-center Turkey University hospital   | Asthma with need for ICS, HDM allergic, ongoing respiratory symptoms despite mite avoidance and appropriate ICS treatment, > 7 years, FEV <sub>1</sub> | 15, 8 male, 11,7 years                                                       | Moderate asthma, need for ICS, respectively symptoms despite mite avoidance, FEV <sub>1</sub> > 70%     | Mono-allergy HDM but negative for all other aeroallergens        | Drops SLIT, dose 100 IR/day, 4 weeks run-in, 4 weeks once daily, thereafter 2/week; total 6 months | Placebo drops                | 6 months  | Symptom scores, compliance, SPT 6 months, Lung function, metacholine, serum IgE                                        | Improvement asthma score. Less use of SABA, trend towards less ICS (not significant), no change in PD20, no serious side effects | Randomization and blinding not clear, possible industrial influence, disclosures not stated, small number of patients, no follow-up after stop of intervention | Season not stated; decrease PEF in placebo group – stable in intervention group                                    |
| <b>Hirsch 1997</b> <sup>48</sup>        | double-blind placebo - controlled SLIT drops HDM | Mono-center, university hospital Germany | Not strictly specified                                                                                                                                 | 30, female n=10, 10,5 years (6-15 years)                                     | 'mild to moderate asthma': n=8; allergic rhinitis: n=8; asthma and rhinitis: n=14 Not further specified | Allergy SPT positive HDM, part also sensitized cat, dog, grasses | Drops SLIT HDM, 3 weeks run-in, maintenance 7 drops 3 days/week; total 12 months                   | Placebo drops (vehicle only) | 12 months | Symptom scores, compliance, SPT 6 months, Lung function, metacholine, serum IgE, collection of dust samples (exposure) | Less pulmonary symptoms No difference use of SABA No change in PD20 No serious side effects                                      | Small number of patients, especially when specified per group. Enrollment of patients (possible selection bias) is not clear. Serious differences in patients  | Season not stated; Asthma group not well-described, exacerbations not described, 8 patients allergic rhinitis only |

|                                                                                                                                                    |                          |                                                              |                    |                                                                                                                                                                                                                                                                                                                   |                          |                                                                                                         |                                                                 |                                                                                                                             |                                                                                      |           |                                                                                     |                                                                                                                                                                         |                                                                                                                                             |                                                                                        |
|----------------------------------------------------------------------------------------------------------------------------------------------------|--------------------------|--------------------------------------------------------------|--------------------|-------------------------------------------------------------------------------------------------------------------------------------------------------------------------------------------------------------------------------------------------------------------------------------------------------------------|--------------------------|---------------------------------------------------------------------------------------------------------|-----------------------------------------------------------------|-----------------------------------------------------------------------------------------------------------------------------|--------------------------------------------------------------------------------------|-----------|-------------------------------------------------------------------------------------|-------------------------------------------------------------------------------------------------------------------------------------------------------------------------|---------------------------------------------------------------------------------------------------------------------------------------------|----------------------------------------------------------------------------------------|
|                                                                                                                                                    |                          |                                                              |                    |                                                                                                                                                                                                                                                                                                                   |                          |                                                                                                         |                                                                 |                                                                                                                             |                                                                                      |           |                                                                                     | groups, otherwise than intervention (type and duration of disease), no follow-up after intervention. 20% drop-out in intervention group, no intention-to-treat analysis |                                                                                                                                             |                                                                                        |
| 20<br>21<br>22<br>23<br>24<br>25<br>26<br>27<br>28<br>29<br>30<br>31<br>32<br>33<br>34<br>35<br>36<br>37<br>38<br>39<br>40<br>41<br>42<br>43<br>44 | Pajno 2003 <sup>50</sup> | double-blind placebo-controlled SLIT drops <i>Parietaria</i> | Mono-center, Italy | Inclusion: seasonal asthma and rhinoconjunctivitis, DDA, poor symptom control despite antihistamine, ICS and nedocromil use during pollen season, positive skin prick test <i>Parietaria</i> , Specific IgE to <i>Parietaria</i> .<br>Exclusion: sensitization to other allergens, previous immunotherapy, severe | 38, 20 female, 11 years, | DDA, seasonal asthma, poor control despite medication, including ICS, patients with PD20<2.0mg excluded | Mono sensitization to <i>Parietaria</i> , SPT and RAST positive | Drops SLIT <i>Parietaria</i> , 4 weeks run-in, maintenance every other day, total 12 months, co-medication with fluticasone | Placebo drops + fluticasone 2 <sup>nd</sup> control group: no protocolled medication | 12 months | Symptom scores, VAS score during pollen season, compliance, SPT 6 months, serum IgE | No difference in symptom scores. Better VAS in SLIT group                                                                                                               | Patient selection not clear: 30/38 children were randomized; 8 were control (not willing to participate in trial?), possible selection bias | Unclear whether fluticasone was given intranasally or orally. No lung function or PD20 |

1  
2  
3  
4  
5  
6  
7  
8  
9  
10  
11  
12  
13  
14  
15  
16  
17  
18  
19  
20  
21  
22  
23  
24  
25  
26  
27  
28  
29  
30  
31  
32  
33  
34  
35  
36  
37  
38  
39  
40  
41  
42  
43  
44  
45  
46  
47  
48  
49

|                                                |                                                                |                                           |                                                                                                    |                                                  |                                  |                                                                 |                                                                                                                                                                                                                                                                                                                                                                                   |               |           |                                                                                                                     |                                                                                                                                                                             |                                                              |                                                                                                                        |
|------------------------------------------------|----------------------------------------------------------------|-------------------------------------------|----------------------------------------------------------------------------------------------------|--------------------------------------------------|----------------------------------|-----------------------------------------------------------------|-----------------------------------------------------------------------------------------------------------------------------------------------------------------------------------------------------------------------------------------------------------------------------------------------------------------------------------------------------------------------------------|---------------|-----------|---------------------------------------------------------------------------------------------------------------------|-----------------------------------------------------------------------------------------------------------------------------------------------------------------------------|--------------------------------------------------------------|------------------------------------------------------------------------------------------------------------------------|
|                                                |                                                                |                                           | asthma (FEV <sub>1</sub> <70%), other diseases                                                     |                                                  |                                  |                                                                 |                                                                                                                                                                                                                                                                                                                                                                                   |               |           |                                                                                                                     |                                                                                                                                                                             |                                                              |                                                                                                                        |
| <b>Pajno 2004</b> <sup># 51</sup>              | double-blind placebo - controlled SLIT drops <i>Parietaria</i> | Mono-center, Italy                        | seasonal asthma during spring and allergic rhinitis                                                | 30 (8-14 years)                                  | DDA                              | Mono sensitization to <i>Parietaria</i> , SPT and RAST positive | Drops SLIT <i>Parietaria</i> , 4 weeks run-in, maintenance every other day, total 12 months                                                                                                                                                                                                                                                                                       | Placebo drops | 24 months | Lung function and PD20                                                                                              | No change in lung function, improvement in BHR (PD20) after 2 years                                                                                                         | 1 author affiliated to pharmaceutical industry               |                                                                                                                        |
| <b>Rolinck-Werning-haus 2004</b> <sup>53</sup> | double-blind placebo - controlled SLIT drops grass-pollen      | Multi-center, university clinics, Germany | Allergic rhinitis with or without seasonal asthma<br>Exclusion criteria: perennial asthma, ICS use | Total 97 (32 female), 3-14 years<br>Asthma: n=39 | DDA, seasonal asthma, no ICS use | Grasspollen IgE and SPT positive<br>Others not mentioned        | Drops SLIT 5-grass mixture, 4 week run-in, 3 doses/week, total 32 months<br>1000 STU were equivalent to 25 BU and contained 2.5 µg of major grass pollen allergens. The monthly dose during maintenance treatment was 6 µg (0.5 µg/dose, 3 times/week). The median for the total duration of treatment was 32 months (January 1999 to November 2001) with a median cumulated dose | Placebo drops | 32 months | Primary end-point: multiple symptom-medication score, lung function, FeNO (part of the participants), complications | Less use of combined medication (asthma medication not analyzed separately). Lung function inconclusive; No change in FeNO<br>1 patient asthma exacerbation related to SLIT | 2 <sup>nd</sup> author affiliated to pharmaceutical industry | "this is not my patient" (perennial asthma excluded); lung function only analyzed as absolute values (not % predicted) |



|                                    |                                                |                     |                                                                                                                                                           |                                  |                                          |          |                                                                                                                                                                                 |               |          |                                                                                                         |                                                                                                      |                                                                                                                        |  |
|------------------------------------|------------------------------------------------|---------------------|-----------------------------------------------------------------------------------------------------------------------------------------------------------|----------------------------------|------------------------------------------|----------|---------------------------------------------------------------------------------------------------------------------------------------------------------------------------------|---------------|----------|---------------------------------------------------------------------------------------------------------|------------------------------------------------------------------------------------------------------|------------------------------------------------------------------------------------------------------------------------|--|
|                                    |                                                |                     |                                                                                                                                                           |                                  |                                          |          | of 188 µg allergen                                                                                                                                                              |               |          |                                                                                                         |                                                                                                      |                                                                                                                        |  |
| <b>Ippoliti 2003</b> <sup>56</sup> | double-blind placebo-controlled SLIT drops HDM | Monocenter, Italy   | Mild/moderate asthma with or without rhinoconjunctivitis, FEV <sub>1</sub> > 70% predicted, mono-allergy HDM<br>Exclusion: other allergies, severe asthma | 86 (5-12 years); 35 female       | Mild/moderate asthma, no seasonal asthma | Mono HDM | Drops SLIT <i>Dermatophagoides pteronyssinus</i> 1 + 2, 3 doses/week, 6 months                                                                                                  | Placebo drops | 6 months | Symptoms (unexplained scale), FEV <sub>1</sub> , serum parameters, tolerance                            | Symptom scale not explained FEV <sub>1</sub> ; SLIT: 83,4% → 92,6%; placebo: 80,7% → 81,2% (no test) | Poor description of methods (randomization, blinding, drop-out, outcome assessment, and results), selected population? |  |
| <b>Niu 2006</b> <sup>57</sup>      | double-blind placebo-controlled SLIT drops HDM | Multicenter, Taiwan | 6-12 years, mild/moderate asthma, mono-allergy HDM, FEV <sub>1</sub> > 70%.<br>Exclusion: other allergies, severe asthma                                  | 110; 97 in follow-up (39 female) | Mild/moderate asthma                     | Mono HDM | Drops SLIT <i>Dermatophagoides pteronyssinus</i> + <i>Dermatophagoides farinae</i> , 4 weeks pretreatment, 3 weeks inductions, 21 weeks treatment, 2 weeks evaluation follow-up | Placebo drops | 30 weeks | Symptom scores, medication scores, lung function, skin prick test, serum IgE, global assessment, safety | Symptoms FEV <sub>1</sub> : no numeric data described                                                | Poor description of randomization and blinding procedure, poor outcome reports                                         |  |
| <b>Pajno 2000</b> <sup>58</sup>    | double-blind placebo-controlled SLIT drops HDM | Monocenter Italy    | Mild/moderate asthma, mono-allergy HDM<br>Exclusion: other allergies, severe asthma                                                                       | 24 (8-15 years); 11 female       | Mild/moderate asthma                     | Mono HDM | Drops SLIT <i>Dermatophagoides pteronyssinus</i> 1 + 2, maintenance 3 doses/week, 3 years                                                                                       | Placebo       | 3 years  | Symptoms, medication use, asthma episodes, laboratory tests, side effects                               | Only nighttime symptoms reported                                                                     | Few children, methodological failure on drop-outs, selective outcome report                                            |  |

Abbreviations: µg: micrograms; BHR: bronchial hyperreactivity; BU: biological units; DDA: doctor diagnosed asthma; FeNO: fraction nitric oxide in exhaled air; FEV<sub>1</sub>: forced expiratory volume in 1 second; HDM: house dust mite; ICS: inhaled corticosteroids; IR: index units of reactivity; n: number; PD20: concentration (metacholin/histamine) that causes a 20% fall in FEV<sub>1</sub>; PEF: peak expiratory flow; RAST: radioallergent sorbent test; RCT: randomized controlled trial; SABA: short-acting beta agonists; SLIT: sublingual immunotherapy; SPT: skin prick test; STU: specific treatment units; VAS: visual analogue scale

\* Doctors diagnosed asthma? Stable/seasonal asthma? Mild/severe asthma?



1  
2  
3  
4  
5  
6  
7  
8  
9  
10  
11  
12  
13  
14  
15  
16  
17  
18  
19  
20  
21  
22  
23  
24  
25  
26  
27  
28  
29  
30  
31  
32  
33  
34  
35  
36  
37  
38  
39  
40  
41  
42  
43  
44  
45  
46  
47  
48  
49

† Asthma symptoms, allergy/rhinitis symptoms, asthma control, (disease specific) quality of life, exacerbations, lung function, adverse reactions and/or complications  
‡ e.g. randomization procedure, blinding, risk of bias  
\*\* defined as an abrupt and/or progressive worsening of symptoms of shortness of breath, chest tightness, or some combination of these symptoms, which did not respond to regular use of beta-2-agonists for a duration of 24 hours  
# is long term follow-up of Pajno 2003

For peer review only

# BMJ Open

**A GRADE (Grading of Recommendations Assessment, Development and Evaluation) systematic review of immunotherapy in childhood asthma: evidence from previous systematic reviews no longer applicable in current clinical practice**

|                                 |                                                                                                                                                                                                                                                                                               |
|---------------------------------|-----------------------------------------------------------------------------------------------------------------------------------------------------------------------------------------------------------------------------------------------------------------------------------------------|
| Journal:                        | <i>BMJ Open</i>                                                                                                                                                                                                                                                                               |
| Manuscript ID                   | bmjopen-2017-016326.R1                                                                                                                                                                                                                                                                        |
| Article Type:                   | Research                                                                                                                                                                                                                                                                                      |
| Date Submitted by the Author:   | 10-Aug-2017                                                                                                                                                                                                                                                                                   |
| Complete List of Authors:       | van de Griendt, Erik-Jonas; De Kinderkliniek, Paediatrics; AMC, Paediatric Pulmonology<br>Tuut, Mariska; PROVA, guideline development and research<br>de Groot, Hans; Stichting Reinier Haga Groep, Paediatric Allergology<br>Brand, Paul; Isala klinieken, Princess Amalia Children's Clinic |
| <b>Primary Subject Heading</b>: | Evidence based practice                                                                                                                                                                                                                                                                       |
| Secondary Subject Heading:      | Respiratory medicine, Paediatrics, Immunology (including allergy)                                                                                                                                                                                                                             |
| Keywords:                       | Allergy < THORACIC MEDICINE, Asthma < THORACIC MEDICINE, Paediatric thoracic medicine < PAEDIATRICS, GRADE systematic review, Children, Immunotherapy                                                                                                                                         |
|                                 |                                                                                                                                                                                                                                                                                               |

SCHOLARONE™  
Manuscripts

only

1  
2  
3 1 **A GRADE (Grading of Recommendations Assessment, Development and Evaluation)**  
4 2 **systematic review of immunotherapy in childhood asthma: evidence from previous**  
5 3 **systematic reviews no longer applicable in current clinical practice**  
6  
7  
8  
9 4

10  
11 5 **Authors**

- 12  
13 6 1. Erik-Jonas **van de Griendt\*** MD, paediatric pulmonologist,  
14 7 DeKinderkliniek Almere and Academic Medical Centre Amsterdam,  
15 8 Hospitaaldreef 29, 1315 RC Almere, The Netherlands  
16 9 e.j.vandegriendt@amc.uva.nl *and*  
17  
18  
19  
20  
21 11 Mariska K **Tuut\***, MSc, epidemiologist,  
22 12 PROVA, Spoorstraat 31, 7051 CG Varsseveld, The Netherlands,  
23 13 m.tuut@provaweb.nl  
24  
25  
26 14 2. Hans de Groot MD, PhD, allergologist,  
27 15 Department of Paediatric Allergology, Reinier de Graaf Group, Reinier de Graafweg  
28 16 5, 2625 AD Delft, The Netherlands, h.degroot@rdgg.nl  
29  
30  
31  
32  
33 18 3. Paul L.P. Brand MD, PhD, paediatrician, Princess Amalia Children's Center, Isala  
34 19 Hospital, P.O. Box 10400, 8000 GK Zwolle, the Netherlands; UMCG Postgraduate  
35 20 School of Medicine, University Medical Center and University of Groningen, The  
36 21 Netherlands, p.l.p.brand@isala.nl  
37  
38  
39

40 22 *\*both authors contributed equally*  
41  
42  
43  
44

45 24 **Word count:** 3267 words (excluding title page, abstract, refs, figs, tables)  
46  
47  
48

49 26 **Correspondence:**

50  
51 27 Erik-Jonas van de Griendt, dept of paediatrics, DeKinderkliniek  
52 28 Hospitaaldreef 29  
53 29 1315 RC Almere  
54 30 The Netherlands  
55  
56  
57  
58  
59  
60

1  
2  
3  
4  
5  
6  
7  
8  
9  
10  
11  
12  
13  
14  
15  
16  
17  
18  
19  
20  
21  
22  
23  
24  
25  
26  
27  
28  
29  
30  
31  
32  
33  
34  
35  
36  
37  
38  
39  
40  
41  
42  
43  
44  
45  
46  
47  
48  
49  
50  
51  
52  
53  
54  
55  
56  
57  
58  
59  
60

31 telephone: +31 36 7630030

32 e-mail: [e.j.vandegriendt@amc.uva.nl](mailto:e.j.vandegriendt@amc.uva.nl)

For peer review only

### 33 **Copyright/license for publication**

34 The Corresponding Author has the right to grant on behalf of all authors and does grant on  
35 behalf of all authors, a worldwide licence to the Publishers and its licensees in perpetuity, in  
36 all forms, formats and media (whether known now or created in the future), to i) publish,  
37 reproduce, distribute, display and store the Contribution, ii) translate the Contribution into  
38 other languages, create adaptations, reprints, include within collections and create  
39 summaries, extracts and/or, abstracts of the Contribution, iii) create any other derivative  
40 work(s) based on the Contribution, iv) to exploit all subsidiary rights in the Contribution, v) the  
41 inclusion of electronic links from the Contribution to third party material where-ever it may be  
42 located; and, vi) licence any third party to do any or all of the above.

### 44 **Conflict of interest**

45 All authors have completed the ICMJE uniform disclosure form at  
46 [http://www.icmje.org/coi\\_disclosure.pdf](http://www.icmje.org/coi_disclosure.pdf) and declare: no support from any organisation for the  
47 submitted work, no financial relationships with any organisations that might have an interest  
48 in the submitted work in the previous three years, no other relationships or activities that  
49 could appear to have influenced the submitted work.

### 51 **Funding**

52 This work was performed as part of the revision of the Dutch Guideline on Paediatric  
53 Asthma. This guideline development was financially supported by the Dutch College of  
54 Paediatricians NVK and a grant of the Dutch Federation of Medical Specialists SKMS.

### 56 **Contributorship statement**

57 EJJ designed the study, chaired the guideline working group, provided clinical input (e.g.  
58 defined clinical relevant outcome measures, judged the literature review from a clinical point  
59 of view), wrote and revised the manuscript, and approved the final version.

60 MKT designed the study, was methodologist of the guideline working group, provided  
61 methodological input (e.g. provided literature search, selection, critical appraisal, GRADE  
62 evidence profiles), wrote and revised the manuscript, and approved the final version.

1  
2  
3 63 HdG was member of the guideline working group, designed the study, revised the  
4 64 manuscript and approved the final version.

5  
6  
7 65 PB provided clinical input, revised the manuscript and approved the final version.

8  
9 66 All authors meet full criteria for authorship, i.e. all contributed substantially, revised, approved  
10 67 the final version of the manuscript and agreed to be accountable for all aspects of the work.

11  
12 68

13  
14  
15 69 **Data sharing statement**

16  
17 70 Extra data can be accessed in the online repository. Apart from this, no additional data are  
18 71 available.

19  
20  
21 72

22  
23  
24 73 **Transparency declaration**

25  
26 74 The corresponding author affirms that this manuscript is an honest, accurate, and  
27 75 transparent account of the study being reported; that no important aspects of the study have  
28 76 been omitted; and that any discrepancies from the study as planned (and, if relevant,  
29 77 registered) have been explained.  
30  
31  
32  
33  
34  
35  
36  
37  
38  
39  
40  
41  
42  
43  
44  
45  
46  
47  
48  
49  
50  
51  
52  
53  
54  
55  
56  
57  
58  
59  
60

78 **Abbreviations**

- 79 • 95%CI: 95% confidence interval
- 80 • AMSTAR: A Measurement Tool to Assess Systematic Reviews
- 81 • FEV<sub>1</sub>: forced expiratory volume in 1 second
- 82 • GRADE: Grading of Recommendations, Assessment, Development and Evaluation
- 83 • ICS: inhaled corticosteroids
- 84 • RCT: randomized controlled trial
- 85 • SCIT: subcutaneous immunotherapy
- 86 • SR: systematic review
- 87 • SLIT: sublingual immunotherapy

88

89 **Key words:** allergy, asthma, children, adolescents, immunotherapy, efficacy, GRADE,  
90 systematic review

91

1  
2  
3 92 **Abstract**  
4

5 93 **Objective.** Because most children with asthma now use inhaled corticosteroids (ICS), the  
6 added benefit of immunotherapy in asthmatic children needs to be examined. We re-  
7 94 assessed the effectiveness of subcutaneous (SCIT) and sublingual immunotherapy (SLIT) in  
8 95 childhood asthma treatment focusing on studies with patient relevant outcome measures and  
9 96 children using ICS.  
10 97

11 98 **Methods.** We used the GRADE approach to systematically search and appraise the  
12 99 evidence using predefined critical patient relevant outcomes (asthma symptoms, asthma  
13 100 control and exacerbations). We searched to retrieve systematic reviews and randomized  
14 101 controlled trials on immunotherapy for asthma in children (1960 - 2017). We assessed the  
15 102 quality of the body of evidence with GRADE criteria.  
16  
17  
18  
19  
20  
21

22 103 **Results.** The quality of the evidence for SCIT was very low due to a large risk of bias and  
23 104 indirectness (dated studies in children not using ICS). No effect of SCIT was found for  
24 105 asthma symptoms; no studies reported on asthma control. For asthma exacerbations,  
25 106 studies favoured SCIT. We have little confidence in this effect estimate, due to the very low  
26 107 quality of evidence. For SLIT, quality of the evidence was very low due to a large risk of bias,  
27 108 indirectness and imprecision. The outcome "asthma symptoms" could not be calculated due  
28 109 to lack of standardization and large clinical heterogeneity. Other predefined outcomes were  
29 110 not reported.  
30  
31  
32  
33  
34

35 111 **Conclusion.** The beneficial effects of immunotherapy in childhood asthma found in earlier  
36 112 reviews are no longer considered applicable, because of indirectness (studies performed in  
37 113 children not being treated according to current asthma guidelines with inhaled  
38 114 corticosteroids). There was absence of evidence to properly determine the effectiveness or  
39 115 lack thereof of immunotherapy in childhood asthma treatment.  
40  
41  
42  
43  
44  
45  
46  
47  
48  
49  
50  
51  
52  
53  
54  
55  
56  
57  
58  
59  
60



1  
2  
3 116 **Strengths and limitations**  
4

- 5 117 • This study is the first review evaluating immunotherapy in asthmatic children using  
6 118 the GRADE approach, focusing more on clinically relevant than on statistically  
7 119 significant differences in patient relevant outcomes.  
8  
9  
10 120 • Contrary to earlier reviews our study concluded that there is no evidence for  
11 121 beneficial effects of immunotherapy for asthma in children.  
12  
13  
14 122 • A limitation of the study was the lack of evidence, especially the lack of recent studies  
15 123 in current pediatric asthma populations, and lack of reported outcomes in the included  
16 124 studies.  
17  
18  
19 125 • This study has focused on critically appraising ancient evidence for nowadays  
20 126 practice, rather than endeavoring to be complete.  
21  
22  
23  
24  
25  
26  
27  
28  
29  
30  
31  
32  
33  
34  
35  
36  
37  
38  
39  
40  
41  
42  
43  
44  
45  
46  
47  
48  
49  
50  
51  
52  
53  
54  
55  
56  
57  
58  
59  
60

## 127 Introduction

128 Asthma affects 10-15% of school-aged children. For children with persistent asthma, all  
129 international guidelines recommend daily controller treatment with inhaled corticosteroids  
130 (ICS), and reliever medication (short-acting  $\beta$ -2-agonists) as needed.<sup>1,2</sup> Although many  
131 children achieve complete asthma control using this effective and safe treatment,<sup>1</sup> some  
132 need additional treatment to obtain disease control.<sup>3,4</sup> Identification and treatment of  
133 comorbidities in children with problematic severe asthma is part of the stepwise approach to  
134 improve asthma control in these children.<sup>5,6</sup>

135 The most common of these comorbidities in children with asthma is allergic rhinitis,<sup>5</sup>  
136 symptoms of which occur in 60-80% of asthmatic children.<sup>7,8</sup> Allergic rhinitis shares a  
137 common pathophysiological pathway with asthma, which has been described as the united  
138 airway concept.<sup>9</sup> Allergic rhinitis is associated with worse asthma control in children, and  
139 accumulating evidence suggests that treatment of allergic rhinitis with intranasal steroids  
140 improves not only rhinitis, but also asthma symptoms in these patients.<sup>7,10,11</sup>

141 When symptoms of allergic rhinitis cannot be sufficiently controlled with nasal corticosteroids  
142 and oral antihistamines,<sup>9,12</sup> immunotherapy can be considered as additional treatment.<sup>13</sup>  
143 Subcutaneous immunotherapy (SCIT) requires repeated injections with an allergen extract  
144 and is available for allergens such as grass and tree pollen and house dust mite. After  
145 disappointing results of low-dose preparations in drops, effective high-dose sublingual  
146 immunotherapy (SLIT) has now become available with grass pollen allergen extract in a daily  
147 sublingual tablet.<sup>14,15</sup> A Cochrane systematic review, first published in 2000, and last updated  
148 in 2010, reported beneficial effects of immunotherapy in children with asthma.<sup>16</sup> Multiple  
149 studies in this latter review, however, were performed before or in the 1980s, when most  
150 children with asthma were not using ICS.

151 As part of the update of the Dutch pediatric guideline on childhood asthma, we evaluated the  
152 literature on the added value of SCIT and SLIT in childhood asthma.<sup>17</sup> Our structured clinical  
153 question was to assess whether immunotherapy (subcutaneous or sublingual), as an add-on  
154 to usual care with daily ICS, improves asthma outcomes in children (6-12 years) and  
155 adolescents (>12 years) with persistent asthma and sensitization to relevant aeroallergens  
156 (grass or tree pollen, house dust mite, or combinations), with or without symptoms of allergic  
157 rhinitis.

158

## 159 **Methods**

160 We used the GRADE approach (Grading of Recommendations Assessment, Development  
 161 and Evaluation) to appraise and summarize the body of evidence. GRADE is an  
 162 internationally approved standard for managing complex evidence reviews.<sup>18</sup> In contrast to  
 163 former grading systems, GRADE focuses on the quality of the total body of evidence, instead  
 164 of judging single studies. Another important characteristic of GRADE is that predefined  
 165 outcomes with thresholds for clinical relevance are being used.<sup>19</sup> In earlier grading systems,  
 166 the evidence was summarized using outcomes reported in studies, not necessarily being  
 167 outcomes a guideline development group would be interested in.<sup>20</sup> GRADE avoids the use of  
 168 surrogate or intermediate outcomes, and uses outcomes and differences that are more  
 169 clinically relevant to patients instead. Starting from a systematic review, for each outcome the  
 170 quality of evidence can be downgraded or upgraded, for instance based on risk of bias,  
 171 inconsistency, indirectness, possible publication bias, and dose-response relation.

172 The guideline development group included an epidemiologist, paediatric respiratory  
 173 physicians, paediatricians, an allergist, an ear-nose-throat specialist, a family physician, a  
 174 lung function technician, a youth public health care physician, and patient representatives.  
 175 The guideline development group predefined clinically relevant outcomes and divided these  
 176 into critical (contributing to the overall quality of evidence), important (also relevant to the  
 177 content of the guideline) and not important outcomes. For each outcome, a minimal clinically  
 178 important difference was defined *a priori*. The outcomes taken into account in our literature  
 179 review are summarized in *table 1*, with corresponding minimal clinically important  
 180 differences.<sup>21-24</sup>

181 **Table 1. Patient relevant outcomes and clinical relevance**

| Outcome                            | Importance | Minimal clinically important difference |
|------------------------------------|------------|-----------------------------------------|
| Asthma symptoms                    | Critical   | ACT: 3 c-ACT: (2-)3*                    |
| (Severe) exacerbations             | Critical   | NNT n=10                                |
| Asthma control                     | Critical   | ACT: 3 c-ACT: (2-)3*                    |
| (Disease-specific) quality of life | Important  | PAQLQ: 0.5 (scale 0-7)*                 |
| Change in FEV <sub>1</sub>         | Important  | >5%predicted                            |

182 \* or comparable differences on other valid scales representing this outcome

183 Abbreviations: ACT: asthma control test; c-ACT: child ACT; NNT: number needed to treat (to prevent one  
 184 exacerbation); PAQLQ: Pediatric Asthma Quality of Life Questionnaire

185 We applied a sensitive search strategy to retrieve all available evidence addressing the  
 186 clinical question, focusing on systematic reviews (SRs) about asthma and immunotherapy in  
 187 children. Literature searches were performed in March 2012 for the guideline (from 1960  
 188 onwards), and updated in April 2015 for the purpose of this review. A second update,  
 189 including an expansion of the searching scope, was performed in June 2017. (see *table E1 in*  
 190 *the Online Repository*). In the original search, we searched in the Cochrane Database of

1  
2  
3 191 Systematic Reviews, the Database of Abstracts of Reviews of Effectiveness and the  
4 192 Cochrane Central Trial Register. . In the 2017 update we also searched for systematic  
5 193 reviews in the Medline and Embase databases (again from 1960 onwards). Two reviewers  
6 194 (EJvdG, MKT) independently screened the abstracts using predefined inclusion criteria:  
7 195 methodology (SRs), patients (children with allergic asthma), and SCIT and/or SLIT as an  
8 196 intervention. Animal studies, conference abstracts, and studies published in languages other  
9 197 than English, Dutch and German were excluded. Differences between reviewers were  
10 198 resolved by consensus. Selected abstracts were critically appraised with respect to study  
11 199 population, intervention and methodological aspects (e.g. systematic search and selection,  
12 200 inclusion of randomized controlled trials (RCTs)), which led to a further selection. An expert  
13 201 in the field (HdG) judged the selection for completeness.

14  
15 202 All included studies were summarized in evidence tables by two reviewers (EJvdG, MKT).  
16 203 SRs were critically appraised using the AMSTAR checklist (A Measurement Tool to Assess  
17 204 Systematic Reviews).<sup>25</sup> AMSTAR scores range from 0-11, a higher score indicating better  
18 205 quality (less bias). The Jadad scale was used to assess the methodological quality of each  
19 206 included RCT.<sup>26</sup> This score ranges from 0-5, a higher score denoting a better quality. All  
20 207 eligible studies together defined the body of evidence, of which the quality was determined  
21 208 (per relevant outcome and overall quality) and GRADE Profiles were created. Results from  
22 209 SRs and RCTs were pooled, if possible, in meta-analyses using RevMan 5. We calculated  
23 210 standardized mean differences for continuous outcomes, because of the usage of different  
24 211 symptom scales in the underlying studies. We calculated risk ratios for dichotomous  
25 212 outcomes, to compare the probability of these outcomes between the intervention and  
26 213 control groups. In the meta-analyses we used random effects models, because of the  
27 214 possibility of generalization of the outcomes for different allergens, and tested the difference  
28 215 between intervention and control with the inverse variance method, since this method is  
29 216 typically used in meta-analyses to combine the results of independent studies. We reported  
30 217 95% confidence intervals (pre-defined significance level: 0.05). Conclusions were drawn,  
31 218 based on quality and content, per outcome and discussed in the expert group until  
32 219 consensus was reached.

## 33 220 **Patient involvement**

34 221 The guideline development group included patient representatives who helped defining our  
35 222 clinical question, approved outcome measures and assessed its clinical relevancy. The  
36 223 burden of interventions and patient considerations were assessed as part of the GRADE  
37 224 evaluation. Patients were not directly involved in this systematic review since we reviewed  
38 225 published literature.

1  
2  
3 226 **Results**

4  
5 227 ***Literature search and selection***

6  
7 228 Screening of titles and abstracts yielded 83 eligible studies, 10 of which fulfilled the inclusion  
8 criteria.<sup>16,27-35</sup> After examining these 10 papers in full, 5 more studies were excluded (*figure*  
9 229 1).

10 230  
11  
12 231 Experts in the guideline working group confirmed that no relevant publications were missed.  
13 232 The updated search (April 2015) revealed 43 additional studies, of which 2 fulfilled the  
14 233 inclusion criteria.<sup>36,37</sup> Full text examination resulted in exclusion of these 2 studies. The  
15 234 extended and updated search in June 2017 resulted in 177 hits, of which 6 were selected to  
16 235 full paper study<sup>38-43</sup>. These studies were systematic reviews in the field of SCIT and/or SLIT  
17 236 in children with asthma. Most of the included RCT's in these reviews had already been  
18 237 included in the 2015 search. We only added RCT's of those reviews to our meta-analyses  
19 238 that have not been included earlier. As a result, we added one study<sup>44</sup>.

20  
21 239

22 240 < *figure 1* > *Literature selection*

23  
24 241

25  
26 242 ***Results of SCIT***

27  
28 243 *Description of studies*

29  
30 244 We retrieved one Cochrane SR on the effectiveness of SCIT in patients with asthma ,  
31 245 including 90 RCTs with a total of 3,792 patients.<sup>16</sup> This was a high-quality review (AMSTAR  
32 246 score 10/11). Fourteen of the included RCTs were performed in children exclusively; another  
33 247 24 included children and adults. In a few studies the age inclusion criteria were not clear. The  
34 248 characteristics of this review are summarized in an evidence table (*see table E2 in the Online*  
35 249 *Repository*). Only nine RCTs included in this review reported on our predefined outcomes in  
36 250 children. In these nine studies different allergens or combinations were studied (house dust  
37 251 mite (3), dog dander (1), grass pollen (1), mold (1), grass pollen/house dust mite (1), tailored  
38 252 combinations (2)). Two RCTs published after the 2010 Cochrane review were retrieved. In  
39 253 the first, the clinical efficacy of house dust mite-specific SCIT in 20 asthmatic children was  
40 254 compared to no intervention in 20 others; patients were followed up for six months.<sup>34</sup> In the  
41 255 other, the effects of allergen-specific SCIT on corticosteroid dose in asthmatic children was  
42 256 evaluated.<sup>35</sup> Details of all included RCTs are summarized in the evidence table (*see table E3*  
43 257 *in the Online Repository*).

258 Quality of the evidence

259 Little information was given about the included studies in the Cochrane review; e.g. follow-up  
 260 was not stated. There were also other concerns about the quality of the literature, e.g. not all  
 261 studies were double-blind and placebo-controlled, and randomization procedures were poor.  
 262 Therefore we re-analyzed the individual paediatric studies in the Cochrane review, plus the  
 263 added studies.<sup>34,35</sup> Jadad scores of the single studies are presented in *table 2*.

264 **Table 2. Jadad scores of RCTs on SCIT**

|                              | Randomization* | Blinding** | Withdrawals <sup>#</sup> | Total |
|------------------------------|----------------|------------|--------------------------|-------|
| Adkinson 1997 <sup>45</sup>  | 1              | 1          | 1                        | 3     |
| Altintas 1999 <sup>46</sup>  | 1              | 1          | 1                        | 3     |
| Dreborg 1986 <sup>47</sup>   | 1              | -          | -                        | 1     |
| Hill 1982 <sup>48</sup>      | 1              | -          | -                        | 1     |
| Johnstone 1961 <sup>49</sup> | 2              | 1          | -                        | 3     |
| Johnstone 1968 <sup>50</sup> | 2              | 1          | 1                        | 4     |
| Price 1984 <sup>51</sup>     | 1              | 1          | -                        | 3     |
| Tsai 2010 <sup>34</sup>      | 1              | -          | 1                        | 2     |
| Valovirta 1984 <sup>52</sup> | 1              | -          | 1                        | 2     |
| Warner 1978 <sup>53</sup>    | 1              | 1          | 1                        | 3     |
| Zielen 2010 <sup>35</sup>    | 1              | 1          | 1                        | 3     |

265 \* 1 point if randomization is mentioned; 1 additional point if the method of randomization is appropriate; minus 1  
 266 point if the method of randomization is inappropriate

267 \*\* 1 point if blinding is mentioned; 1 additional point if the method of blinding is appropriate; minus 1 point if the  
 268 method of blinding is inappropriate

269 <sup>#</sup> 1 point if the number and the reasons for withdrawal in each group are stated

270 The quality of the body of evidence for all critical and important outcomes was very low (*table*  
 271 3), mainly due to large risk of bias and indirectness. The large risk of bias was caused by a  
 272 lack of allocation concealment, lack of information on follow-up, and loss to follow-up. The  
 273 reason for downgrading for indirectness was the publication year of the underlying studies;  
 274 populations and interventions were considered inapplicable to current clinical practice.

275 **Table 3. GRADE Evidence Profile SCIT**

| Quality assessment                                     |              |                           |               |                      |             |                      | Number of patients |                 | Effect           |                                                                | Quality       | Importance |
|--------------------------------------------------------|--------------|---------------------------|---------------|----------------------|-------------|----------------------|--------------------|-----------------|------------------|----------------------------------------------------------------|---------------|------------|
| Number of studies                                      | Study design | Risk of bias              | Inconsistency | Indirectness         | Imprecision | Other considerations | SCIT               | No intervention | Relative (95%CI) | Absolute (95%CI)                                               |               |            |
| Asthma symptoms (assessed with: Asthma symptom scores) |              |                           |               |                      |             |                      |                    |                 |                  |                                                                |               |            |
| 5 <sup>a</sup>                                         | RCT          | Very serious <sup>b</sup> | Not serious   | Serious <sup>c</sup> | Not serious | None                 | 136                | 286             | -                | Standardized Mean Difference 0.04 lower (95%CI: -0.42 to 0.33) | ⊕○○○ VERY LOW | CRITICAL   |

| Exacerbations (assessed with: Symptomatic deterioration) |     |                      |             |                           |             |      |                |                |                                |                                       |                  |           |
|----------------------------------------------------------|-----|----------------------|-------------|---------------------------|-------------|------|----------------|----------------|--------------------------------|---------------------------------------|------------------|-----------|
| 5 <sup>a</sup>                                           | RCT | Serious <sup>d</sup> | Not serious | Very serious <sup>e</sup> | Not serious | None | 64/253 (25.3%) | 92/153 (60.1%) | Risk ratio 0.43 (0.34 to 0.56) | 343 fewer per 1000 (95%CI: -397 to -) | ⊕○○○<br>VERY LOW | CRITICAL  |
| Asthma control – not reported                            |     |                      |             |                           |             |      |                |                |                                |                                       |                  |           |
| -                                                        | -   | -                    | -           | -                         | -           | -    | -              | -              | -                              | -                                     | -                | CRITICAL  |
| Quality of life – not reported                           |     |                      |             |                           |             |      |                |                |                                |                                       |                  |           |
| -                                                        | -   | -                    | -           | -                         | -           | -    | -              | -              | -                              | -                                     | -                | IMPORTANT |
| Lung function – not reported                             |     |                      |             |                           |             |      |                |                |                                |                                       |                  |           |
| -                                                        | -   | -                    | -           | -                         | -           | -    | -              | -              | -                              | -                                     | -                | IMPORTANT |

276 Abbreviations: 95%CI: 95% confidence interval; RCT: randomized controlled trials; SCIT: subcutaneous  
277 immunotherapy

278 a. Studies in Cochrane review Abramson + Tsai

279 b. The underlying studies had a quite large risk of bias, due to lack of allocation concealment, problems with  
280 blinding, and lack of information on follow-up (and loss-to-follow-up)

281 c. We downgraded for indirectness, because the included studies are quite old and maintenance medication may  
282 have changed probably; thus, study populations may alter from nowadays patients with moderate to severe  
283 asthma

284 d. We downgraded for risk of bias, because of problems with blinding and loss-to-follow-up

285 e. We assessed very serious indirectness, because most included studies for this outcome are very old, and  
286 carried out before the ICS-era; thus, patients nowadays differ from study populations

### 287 Critical outcomes

288 Asthma symptoms. Four small studies carried out in children only reported this outcome in  
289 the Cochrane review.<sup>16</sup> We extracted these results from the Cochrane review and updated  
290 these with the results from Tsai et al.<sup>34</sup> Results are presented in *figure 2*.

291

292 <figure 2 >

293

294 The meta-analysis showed no significant effect of SCIT on asthma symptoms.

295 Asthma exacerbations. Five studies (published 1961-1984) in the Cochrane review, carried  
296 out in children only, reported this outcome.<sup>16</sup> No relevant studies of sufficient quality were  
297 published afterwards. Our meta-analysis included 253 patients on immunotherapy and 153  
298 on placebo. The pooled risk ratio was 0.47 (95%CI: 0.31 – 0.72), favouring immunotherapy  
299 (see *figure 3*). The absolute risk reduction was 35%, giving a number needed to treat of 3.

300

301 < figure 3 >

302

303 No studies reported results on the critical outcome asthma control.



304 Important outcomes305 No studies reported results on quality of life or lung function (FEV<sub>1</sub>).306 **Results of SLIT**307 Description of studies and quality of the evidence

308 We retrieved two SRs on SLIT in patients with asthma.<sup>29,32</sup> The updated search in 2017  
 309 resulted in the addition of one RCT<sup>44</sup>. The characteristics of the SRs are summarized in  
 310 evidence table E2 (*Online Repository*). The quality of the reviews was moderate; both had an  
 311 AMSTAR score of 7/11. Weaknesses included the absence of an 'a priori design', exclusion  
 312 of grey literature, not assessing the likelihood of publication bias and not mentioning conflicts  
 313 of interest in one review,<sup>29</sup> and the absence of an 'a priori design', no information about  
 314 excluded studies, too firm conclusions compared to the weak evidence, and not assessing  
 315 the likelihood of publication bias in the other.<sup>32</sup> One review included both children and adults,  
 316 and patients with asthma and/or rhinitis.<sup>29</sup> Because of the quality concerns of both existing  
 317 SRs, we set out to perform a meta-analysis of the original studies that fulfilled our selection  
 318 criteria. Jadad scores of selected studies, as well as an overview of the outcomes of those  
 319 studies, are presented in *table 4*. Study characteristics are summarized in the evidence table  
 320 (*see table E4 in the Online Repository*). We rated the quality of evidence to be very low, due  
 321 to a large risk of bias, imprecision and indirect evidence.

322 **Table 4. Summary of quality and outcome measures of selected RCT's in reviews**  
 323 **Calamita et al, Penagos et al and added Pham-Thi et al.**<sup>29,32, 44</sup>

| Review                     | RCT                           | Eligible                | Jadad-score    |            |                          |       | Reported on asthma symptoms | Reported on exacerbations | Reported on asthma control | Reported on disease specific quality of life | Reported on lung function (FEV <sub>1</sub> ) |
|----------------------------|-------------------------------|-------------------------|----------------|------------|--------------------------|-------|-----------------------------|---------------------------|----------------------------|----------------------------------------------|-----------------------------------------------|
|                            |                               |                         | Randomization* | Blinding** | Withdrawals <sup>#</sup> | Total |                             |                           |                            |                                              |                                               |
| Calamita <sup>29</sup>     | Bahceciler 2001 <sup>54</sup> | Yes                     | 1              | 1          | 1                        | 3     | +                           | -                         | -                          | -                                            |                                               |
|                            | Hirsch 1997 <sup>55</sup>     | Yes                     | 2              | 1          | 1                        | 4     | +                           | -                         | -                          | -                                            |                                               |
|                            | Niu 2004 <sup>24</sup>        | No, conference abstract |                |            |                          |       |                             |                           |                            |                                              |                                               |
|                            | Novembre 1991 <sup>56</sup>   | No, Italian language    |                |            |                          |       |                             |                           |                            |                                              |                                               |
|                            | Pajno 2003 <sup>57</sup>      | Yes                     | 2              | 1          | 1                        | 4     | +                           | -                         | -                          | -                                            | -                                             |
| Pajno 2004 <sup>5,58</sup> | Yes                           | 2                       | 1              | 1          | 4                        | -     | -                           | -                         | -                          | +                                            |                                               |



|                        |                                        |                                                  |   |   |   |   |   |   |   |   |   |
|------------------------|----------------------------------------|--------------------------------------------------|---|---|---|---|---|---|---|---|---|
|                        | Rodriguez Santos 2004 <sup>59</sup>    | No, Spanish language                             |   |   |   |   |   |   |   |   |   |
|                        | Rolinck-Werninghaus 2004 <sup>60</sup> | Yes                                              | 1 | 2 | 0 | 3 | + | - | - | - | - |
|                        | Yuksel 1999 <sup>61</sup>              | No, Spanish language                             |   |   |   |   |   |   |   |   |   |
| Penagos <sup>32</sup>  | Bahceciler 2001 <sup>54</sup>          | Overlap with Calamita                            |   |   |   |   |   |   |   |   |   |
|                        | Caffarelli 2000 <sup>62</sup>          | No, children with asthma not separately analyzed |   |   |   |   |   |   |   |   |   |
|                        | Hirsch 1997 <sup>55</sup>              | Overlap with Calamita                            |   |   |   |   |   |   |   |   |   |
|                        | Ippoliti 2003 <sup>63</sup>            | Yes                                              | 1 | 1 | 0 | 2 | + | - | - | - | + |
|                        | Niu 2006 <sup>64</sup>                 | Yes                                              | 1 | 1 | 1 | 3 | + | - | - | - | + |
|                        | Pajno 2000 <sup>65</sup>               | Yes                                              | 2 | 1 | 0 | 3 | + | - | - | - | - |
|                        | Rolinck-Werninghaus 2004 <sup>60</sup> | Overlap with Calamita                            |   |   |   |   |   |   |   |   |   |
|                        | Tari 1990 <sup>66</sup>                | No, Spanish language                             |   |   |   |   |   |   |   |   |   |
|                        | Vourdas 1998 <sup>67</sup>             | No, children with asthma not separately analyzed |   |   |   |   |   |   |   |   |   |
| Pham-Thi <sup>44</sup> | Yes                                    | 2                                                | 1 | 1 | 4 | + |   |   | + | + |   |
| Total                  |                                        |                                                  |   |   |   | 8 | 0 | 0 | 1 | 4 |   |

324 Abbreviations: FEV<sub>1</sub>: forced expiratory volume in 1 second; RCT: randomized controlled trial

325 \* 1 point if randomization is mentioned; 1 additional point if the method of randomization is appropriate; minus 1  
326 point if the method of randomization is inappropriate

327 \*\* 1 point if blinding is mentioned; 1 additional point if the method of blinding is appropriate; minus 1 point if the  
328 method of blinding is inappropriate

329 # 1 point if the number and the reasons for withdrawal in each group are stated

330 § Same patients as Pajno 2003<sup>67</sup>

### 331 Critical outcomes

332 Asthma symptoms. Eight of the included studies reported on asthma symptoms. Different  
333 symptom scores were used, none of them standardized or validated. Clinical differences in  
334 asthma scores were not defined and most studies reported improvement in the treatment  
335 group as well in the control group. We were not able to compile a meta-analysis of the results  
336 of the individual studies, because of the use of various symptom scales in the included  
337 studies. Since studies did not report results in a clearly comparable way, reporting the results  
338 of the individual studies was considered unreliable.

339 Other critical outcomes. No studies reported results on the critical outcomes exacerbations  
340 and asthma control.

### 341 Important outcomes

342 Quality of life. Pham-Thi et al. published results on quality of life using Childhood Asthma  
343 Questionnaires<sup>44</sup>. The authors reported a difference in severity between SLIT and placebo in  
344 the younger population (age 6-11 years), but not in older children (age 12-16 years). It is not  
345 stated whether this difference is clinically relevant.

346 Lung function. Four studies reported results on lung function (FEV<sub>1</sub>). One of the studies  
347 reported no numeric data on lung function.<sup>64</sup> One study reported no variance (standard  
348 deviation), and no comparison of the baseline data.<sup>63</sup> The two remaining studies reported on  
349 FEV<sub>1</sub> percentage predicted,<sup>58</sup> and reported no significant differences between treatment  
350 groups, neither at baseline nor at follow-up.

351

For peer review only

1  
2  
3  
4  
5  
6  
7  
8  
9  
10  
11  
12  
13  
14  
15  
16  
17  
18  
19  
20  
21  
22  
23  
24  
25  
26  
27  
28  
29  
30  
31  
32  
33  
34  
35  
36  
37  
38  
39  
40  
41  
42  
43  
44  
45  
46  
47  
48  
49  
50  
51  
52  
53  
54  
55  
56  
57  
58  
59  
60

1  
2  
3 352 **Discussion**

4  
5 353 Summary of main results

6  
7 354 Our GRADE systematic review showed no evidence of a significant difference in asthma  
8 355 symptoms between SCIT and placebo in children with allergic asthma, but some evidence for  
9 356 a significant and clinically relevant reduction in asthma exacerbations was found in SCIT-  
10 357 treated children. We have little confidence in the effect estimate, however, due to a large risk  
11 358 of bias and indirectness. Thus, the true effect of SCIT on exacerbations and asthma  
12 359 symptoms in the target population of interest is likely to be substantially different from the  
13 360 estimate of effect. There was absence of evidence on the effects of SCIT on lung function,  
14 361 asthma control, and quality of life in children with allergic asthma. There was no evidence for  
15 362 a beneficial effect of SLIT in reducing asthma symptoms and exacerbations, quality of life  
16 363 and lung function in children with allergic asthma. Our review does not address the efficacy  
17 364 of immunotherapy in children regarding complaints of allergic rhinitis and/or conjunctivitis,  
18 365 without having asthma.

19  
20  
21 366 Quality of the evidence / GRADE methodology

22  
23  
24 367 The overall quality of the evidence about the effectiveness of SCIT and SLIT was very low.  
25 368 This implicates that our confidence in the effect estimates is very limited. The true effect of  
26 369 SCIT and SLIT on patient relevant asthma outcomes in children with asthma may be  
27 370 substantially different from our estimates of the effect. We cannot conclude that the possible  
28 371 desirable effects of SCIT and SLIT outweigh the undesirable effects (e.g. influence on quality  
29 372 of life, adverse events, or increased resource expenditure), nor can we reject that  
30 373 hypothesis. Our concerns about the quality of evidence are based on (very) serious risk of  
31 374 bias and indirectness in the underlying primary studies. Firstly, the quality of many studies  
32 375 had to be downgraded because of risk of bias due to lack of allocation concealment, lack of  
33 376 information on follow-up, and loss to follow-up. Secondly, included studies were  
34 377 heterogeneous in the patients included and allergen extracts used, with different dosing  
35 378 regimens and duration being studied, targeting different inhaled allergens. We have concerns  
36 379 about the potential different responses and the generalizability of the evidence. Thirdly, and  
37 380 most importantly, for SCIT, the quality of the body of evidence was downgraded because of  
38 381 indirectness, since patients in the original studies long ago are likely to differ considerably  
39 382 from patients nowadays.

40  
41  
42 383 Fourth, different studies used variable definitions of asthma exacerbations. We had to use  
43 384 'worsening of asthma', which may not represent real-life patient relevant exacerbations. This

1  
2  
3 385 may decrease the applicability of the evidence. In addition, there were no studies using the  
4 386 predefined important outcomes quality of life and asthma control.

5  
6  
7 387 Finally, and most importantly, we have concerns on comparability of patients. Several  
8 388 included studies dated from the 1980s or earlier, when allergic rhinitis treatment with  
9  
10 389 selective antihistamines and nasal corticosteroids was not available. Against the background  
11 390 of the united airway concept, the comorbidity allergic rhinitis in patients in these studies  
12 391 cannot be compared to patients in clinical practice today.<sup>9</sup> Similarly, widespread use of ICS  
13 392 was not introduced in childhood asthma treatment until the 1990s.<sup>68</sup> Most studies on SCIT in  
14 393 children with asthma were published decades ago, during the pre-ICS era. The patients in  
15 394 the described studies represent an incomparable group compared to the child with asthma in  
16 395 contemporary clinical practice. Specifically, it is unclear whether the beneficial effects found  
17 396 in the systematic review of earlier studies is applicable to children with asthma treated  
18 397 according to contemporary guidelines with daily ICS controller therapy.<sup>16</sup>

19  
20  
21  
22  
23  
24 398 In our opinion and that of others, the GRADE approach is superior to former methods of SRs,  
25 399 because it focuses on predefined patient relevant outcomes, predefined minimally clinical  
26 400 important differences and because it judges the complete body of evidence. One RCT  
27 401 among paediatricians studied the influence of different guideline grading systems on  
28 402 clinician's decisions.<sup>69</sup> GRADE showed the largest change in direction on the clinical  
29 403 decision. However, the added value of GRADE on guideline implementation or patient care,  
30 404 has not been formally evaluated, the GRADE approach is still rather complex for non-  
31 405 methodologists.

32  
33  
34  
35  
36  
37 406 To formulate recommendations for clinical practice, not only the body of evidence concerning  
38 407 effectiveness of an intervention is important. Recommendations should balance the benefits  
39 408 and harms of the intervention of interest, and take patient preferences and resource use into  
40 409 account. Since (after critical evaluation) no benefits of SCIT and SLIT for children with  
41 410 asthma were determined, we consider it unlikely that the benefits will exceed the harms.  
42 411 Patient preferences were included in the formulation of our guideline recommendations.

#### 43 44 45 46 47 412 Agreements and disagreements with other studies or reviews

48  
49 413 Using GRADE and re-analyzing data from children with allergic asthma only, we came to  
50 414 different conclusions on the effectiveness of SCIT and SLIT in children with asthma than the  
51 415 authors of the original SRs. We believe this highlights the importance of using GRADE  
52 416 methodology to systematically review evidence for patient relevant outcomes, not focusing  
53 417 on levels of evidence, but on underlying study validity, precision, directness, and applicability  
54 418 in current clinical practice. The 2009 position paper on SLIT describes history, use and  
55  
56  
57  
58  
59  
60

1  
2  
3 419 applicability of this treatment for allergic rhinitis.<sup>70</sup> It positions SLIT in children as a safe and  
4 420 useful therapy above and after more regular treatment for allergic rhinitis. Potential positive  
5 421 treatment outcome for allergic asthma is however mainly based on literature in adults. We  
6 422 show the lack of evidence and lack of applicability of treatment of immunotherapy for asthma  
7 423 in children. Since we have worries on the applicability of evidence in adults on children (who  
8 424 are still developing their immune system), we think further studies that compare  
9 425 immunotherapy for the contemporary treatment of asthma in children are urgently needed to  
10 426 fill in this gap.

11  
12 427 Recently, a Cochrane SR on SLIT for asthma found a similar lack of data for important  
13 428 outcomes (e.g. exacerbations, symptom scores, quality of life) as we did.<sup>71</sup> Contrary to our  
14 429 study, the authors did no separate analysis for adults and children, and patients with asthma  
15 430 were not separately analyzed from patients without asthma.

## 16 431 **Conclusions**

17 432 Focusing on predefined patient relevant outcomes, and critically appraising the body of  
18 433 evidence using original studies and GRADE methodology, our systematic review on the  
19 434 effects of immunotherapy in children with asthma came to different conclusions than previous  
20 435 systematic reviews. We believe that this underscores the importance of using GRADE  
21 436 methodology in systematically reviewing evidence.

22 437 We found absence of valid applicable evidence on improvement of clinically relevant asthma  
23 438 outcomes in children with allergic asthma using SCIT or SLIT. This absence of evidence is  
24 439 due to serious risk of bias, large clinical heterogeneity between studies, and most importantly  
25 440 due to lack of applicability because studies were performed in the pre-ICS era.

26 441 Since the effect of immunotherapy added to contemporary asthma treatment with daily  
27 442 controller therapy is not clear, the drawbacks of immunotherapy should be considered  
28 443 carefully. SCIT is a complex and intensive form of treatment, associated with a (very) long  
29 444 duration of treatment, and considerable burden to the patient with (monthly) injections under  
30 445 adequate medical supervision due to potential (however rare) dangerous side effects, and  
31 446 may have relatively high costs and resource use. In SLIT the risk of serious side-effects is  
32 447 considerably smaller, but the other drawbacks of immunotherapy apply equally to this  
33 448 treatment. In our opinion therefore, when balancing the absence of evidence on a clear  
34 449 beneficial effect of SCIT or SLIT on clinically relevant patient outcomes in children with  
35 450 asthma with the considerable burden and costs of SCIT and SLIT, we do not recommend this  
36 451 treatment to children with asthma until further high-quality evidence from well-designed RCTs  
37 452 in children comparing SCIT or SLIT to contemporary asthma treatment becomes available.

453

For peer review only

1  
2  
3  
4  
5  
6  
7  
8  
9  
10  
11  
12  
13  
14  
15  
16  
17  
18  
19  
20  
21  
22  
23  
24  
25  
26  
27  
28  
29  
30  
31  
32  
33  
34  
35  
36  
37  
38  
39  
40  
41  
42  
43  
44  
45  
46  
47  
48  
49  
50  
51  
52  
53  
54  
55  
56  
57  
58  
59  
60

1  
2  
3  
4  
5  
6  
7  
8  
9  
10  
11  
12  
13  
14  
15  
16  
17  
18  
19  
20  
21  
22  
23  
24  
25  
26  
27  
28  
29  
30  
31  
32  
33  
34  
35  
36  
37  
38  
39  
40  
41  
42  
43  
44  
45  
46  
47  
48  
49  
50  
51  
52  
53  
54  
55  
56  
57  
58  
59  
60

454 **Acknowledgments**

455 We like to thank Nicole Boluyt MD, PhD, Diemen, The Netherlands, for her help in the study  
456 design and revision of an earlier version of the manuscript.

For peer review only

457 **References**

- 458 1. GINA. Global Strategy For Asthma Management And Prevention. 2012.
- 459 2. British Thoracic Society. British Guideline on the management of asthma. 2011.
- 460 3. de Groot EP, Kreggemeijer WJ, Brand PL. Getting the basics right resolves most  
461 cases of uncontrolled and problematic asthma. *Acta Paediatr*. 2015;104(9):916-21.
- 462 4. Hedlin G, Bush A, Lodrup Carlsen K, Wennergren G, De Benedictis FM, Melen E, et  
463 al. Problematic severe asthma in children, not one problem but many: a GA2LEN initiative.  
464 *Eur Respir J*. 2010;36(1):196-201.
- 465 5. de Groot EP, Duiverman EJ, Brand PL. Comorbidities of asthma during childhood:  
466 possibly important, yet poorly studied. *Eur Respir J*. 2010;36(3):671-8.
- 467 6. Lodrup Carlsen KC, Hedlin G, Bush A, Wennergren G, de Benedictis FM, De Jongste  
468 JC, et al. Assessment of problematic severe asthma in children. *Eur Respir J*.  
469 2011;37(2):432-40.
- 470 7. de Groot EP, Nijkamp A, Duiverman EJ, Brand PL. Allergic rhinitis is associated with  
471 poor asthma control in children with asthma. *Thorax*. 2012;67(7):582-7.
- 472 8. Shamsain MH, Shamsian N. Prevalence and severity of asthma, rhinitis, and atopic  
473 eczema in 13- to 14-year-old schoolchildren from the northeast of England. *Ann Allergy*  
474 *Asthma Immunol*. 2001;86(4):428-32.
- 475 9. Brozek JL, Bousquet J, Baena-Cagnani CE, Bonini S, Canonica GW, Casale TB, et  
476 al. Allergic Rhinitis and its Impact on Asthma (ARIA) guidelines: 2010 revision. *J Allergy Clin*  
477 *Immunol*. 2010;126(3):466-76.
- 478 10. Kersten ET, van Leeuwen JC, Brand PL, Duiverman EJ, de Jongh FH, Thio BJ, et al.  
479 Effect of an intranasal corticosteroid on exercise induced bronchoconstriction in asthmatic  
480 children. *Pediatr Pulmonol*. 2012;47(1):27-35.
- 481 11. Rachelefsky G, Farrar JR. A control model to evaluate pharmacotherapy for allergic  
482 rhinitis in children. *JAMA Pediatr*. 2013;167(4):380-6.
- 483 12. de Groot H, Brand PL, Fokkens WF, Berger MY. Allergic rhinoconjunctivitis in  
484 children. *BMJ*. 2007;335(7627):985-8.
- 485 13. Dretzke J, Meadows A, Novielli N, Huissoon A, Fry-Smith A, Meads C. Subcutaneous  
486 and sublingual immunotherapy for seasonal allergic rhinitis: a systematic review and indirect  
487 comparison. *J Allergy Clin Immunol*. 2013;131(5):1361-6.
- 488 14. Bufe A, Eberle P, Franke-Beckmann E, Funck J, Kimmig M, Klimek L, et al. Safety  
489 and efficacy in children of an SQ-standardized grass allergen tablet for sublingual  
490 immunotherapy. *J Allergy Clin Immunol*. 2009;123(1):167-73 e7.



- 1  
2  
3 491 15. Wahn U, Tabar A, Kuna P, Halcken S, Montagut A, de Beaumont O, et al. Efficacy and  
4 492 safety of 5-grass-pollen sublingual immunotherapy tablets in pediatric allergic  
5 493 rhinoconjunctivitis. *J Allergy Clin Immunol*. 2009;123(1):160-6 e3.  
6  
7 494 16. Abramson MJ, Puy RM, Weiner JM. Injection allergen immunotherapy for asthma.  
8  
9 495 *Cochrane Database Syst Rev*. 2010(8):CD001186.  
10  
11 496 17. Dutch Pediatric Society. NVK Richtlijn Astma bij kinderen [Dutch pediatric asthma  
12 497 guidelines]. 2013.  
13 498 <http://www.nvk.nl/tabid/1558/articleType/ArticleView/articleId/708/default.aspx>  
14  
15 499 18. Guyatt G, Oxman AD, Akl EA, Kunz R, Vist G, Brozek J, et al. GRADE guidelines: 1.  
16 500 Introduction-GRADE evidence profiles and summary of findings tables. *J Clin Epidemiol*.  
17 501 2011;64(4):383-94.  
18  
19 502 19. Guyatt GH, Oxman AD, Kunz R, Atkins D, Brozek J, Vist G, et al. GRADE guidelines:  
20 503 2. Framing the question and deciding on important outcomes. *J Clin Epidemiol*.  
21 504 2011;64(4):395-400.  
22  
23 505 20. Atkins D, Eccles M, Flottorp S, Guyatt GH, Henry D, Hill S, et al. Systems for grading  
24 506 the quality of evidence and the strength of recommendations I: critical appraisal of existing  
25 507 approaches The GRADE Working Group. *BMC Health Serv Res*. 2004;4(1):38.  
26  
27 508 21. Reddel HK, Taylor DR, Bateman ED, Boulet LP, Boushey HA, Busse WW, et al. An  
28 509 official American Thoracic Society/European Respiratory Society statement: asthma control  
29 510 and exacerbations: standardizing endpoints for clinical asthma trials and clinical practice. *Am*  
30 511 *J Respir Crit Care Med*. 2009;180(1):59-99.  
31  
32 512 22. Schatz M, Kosinski M, Yaras AS, Hanlon J, Watson ME, Jhingran P. The minimally  
33 513 important difference of the Asthma Control Test. *J Allergy Clin Immunol*. 2009;124(4):719-23  
34 514 e1.  
35  
36 515 23. Vasbinder EC, Janssens HM, Rutten-van Molken MP, van Dijk L, de Winter BC, de  
37 516 Groot RC, et al. e-Monitoring of Asthma Therapy to Improve Compliance in children using a  
38 517 real-time medication monitoring system (RTMM): the e-MATIC study protocol. *BMC medical*  
39 518 *informatics and decision making*. 2013;13:38.  
40  
41 519 24. Niu C, Wang J, Huang J, Lue K, Chen W. Efficacy and safety of sublingual  
42 520 immunotherapy with high dose house dust mite extract in asthmatic children: a multicenter  
43 521 randomized double-blind, and placebo-controlled study. *J Allergy Clin Immunol*.  
44 522 2004;113(Suppl 2):S108.  
45  
46 523 25. Shea BJ, Grimshaw JM, Wells GA, Boers M, Andersson N, Hamel C, et al.  
47 524 Development of AMSTAR: a measurement tool to assess the methodological quality of  
48 525 systematic reviews. *BMC Med Res Methodol*. 2007;7:10.  
49  
50  
51  
52  
53  
54  
55  
56  
57  
58  
59  
60

- 1  
2  
3 526 26. Jadad AR, Moore RA, Carroll D, Jenkinson C, Reynolds DJ, Gavaghan DJ, et al.  
4 527 Assessing the quality of reports of randomized clinical trials: is blinding necessary? *Control*  
5 528 *Clin Trials*. 1996;17(1):1-12.  
6  
7 529 27. Alzakar RH, Alsamarai AM. Efficacy of immunotherapy for treatment of allergic  
8 530 asthma in children. *Allergy Asthma Proc*. 2010;31(4):324-30.  
9 531 28. Antunez C, Mayorga C, Corzo JL, Jurado A, Torres MJ. Two year follow-up of  
10 532 immunological response in mite-allergic children treated with sublingual immunotherapy.  
11 533 Comparison with subcutaneous administration. *Pediatr Allergy Immunol*. 2008;19(3):210-8.  
12  
13 534 29. Calamita Z, Saconato H, Pela AB, Atallah AN. Efficacy of sublingual immunotherapy  
14 535 in asthma: systematic review of randomized-clinical trials using the Cochrane Collaboration  
15 536 method. *Allergy*. 2006;61(10):1162-72.  
16  
17 537 30. Hoeks SB, de Groot H, Hoekstra MO. [Sublingual immunotherapy in children with  
18 538 asthma or rhinoconjunctivitis: not enough evidence because of poor quality of the studies; a  
19 539 systematic review of literature]. *Ned Tijdschr Geneeskd*. 2008;152(5):261-8.  
20  
21 540 31. Keles S, Karakoc-Aydiner E, Ozen A, Izgi AG, Tevetoglu A, Akkoc T, et al. A novel  
22 541 approach in allergen-specific immunotherapy: combination of sublingual and subcutaneous  
23 542 routes. *J Allergy Clin Immunol*. 2011;128(4):808-15 e7.  
24  
25 543 32. Penagos M, Passalacqua G, Compalati E, Baena-Cagnani CE, Orozco S, Pedroza A,  
26 544 et al. Metaanalysis of the efficacy of sublingual immunotherapy in the treatment of allergic  
27 545 asthma in pediatric patients, 3 to 18 years of age. *Chest*. 2008;133(3):599-609.  
28  
29 546 33. Sopo SM, Macchiaiolo M, Zorzi G, Tripodi S. Sublingual immunotherapy in asthma  
30 547 and rhinoconjunctivitis; systematic review of paediatric literature. *Arch Dis Child*.  
31 548 2004;89(7):620-4.  
32  
33 549 34. Tsai TC, Lu JH, Chen SJ, Tang RB. Clinical efficacy of house dust mite-specific  
34 550 immunotherapy in asthmatic children. *Pediatr Neonatol*. 2010;51(1):14-8.  
35  
36 551 35. Zielen S, Kardos P, Madonini E. Steroid-sparing effects with allergen-specific  
37 552 immunotherapy in children with asthma: a randomized controlled trial. *J Allergy Clin*  
38 553 *Immunol*. 2010;126(5):942-9.  
39  
40 554 36. Hui Y, Li L, Qian J, Guo Y, Zhang X, Zhang X. Efficacy analysis of three-year  
41 555 subcutaneous SQ-standardized specific immunotherapy in house dust mite-allergic children  
42 556 with asthma. *Exp Ther Med*. 2014;7(3):630-4.  
43  
44 557 37. Lozano J, Cruz MJ, Piquer M, Giner MT, Plaza AM. Assessing the efficacy of  
45 558 immunotherapy with a glutaraldehyde-modified house dust mite extract in children by  
46 559 monitoring changes in clinical parameters and inflammatory markers in exhaled breath. *Int*  
47 560 *Arch Allergy Immunol*. 2014;165(2):140-7.  
48  
49  
50  
51  
52  
53  
54  
55  
56  
57  
58  
59  
60

- 1  
2  
3 561 38. Compalati E, Passalacqua G, Bonini M, Canonica GW. The efficacy of sublingual  
4 562 immunotherapy for house dust mites respiratory allergy: results of a GA2LEN meta-analysis.  
5 563 Allergy 2009;64:1570-9.  
6  
7  
8 564 39. Lu Y, XU L, Xia M, Li Y, Cao L. The efficacy and safety of subcutaneous  
9 565 immunotherapy in mite-sensitized subjects with asthma: a meta-analysis. Respir Care 2015;  
10 566 60: 269-78.  
11  
12  
13 567 40. Kim JM, Lin SY, Suarez-Cuervo C, Chelladurai Y, Ramanathan M, Segal JB, et al.  
14 568 Allergen-specific immunotherapy for pediatric asthma and rhinoconjunctivitis: a systematic  
15 569 review. Pediatrics 2013;131:1155-67.  
16  
17  
18 570 41. Liao W, Hu Q, Shen L-L, Hu Y, Tao H-F, Li H-F, et al. Sublingual immunotherapy for  
19 571 asthmatic children sensitized to house dust mite. Medicine 2015;94:e701.  
20  
21  
22  
23 572 42. Elliot J, Kelly SE, Johnston A, Skidmire B, Gomes T, Wells GA. Allergen  
24 573 immunotherapy for the treatment of allergic rhinitis and/or asthma: an umbrella review. CMAJ  
25 574 Open 2017;5(2):E373-E385.  
26  
27  
28 575 43. Lin SY, Erekosima N, Kim JM, Ramanathan M, Suarez-Cuervo C, Chelladurai Y, et  
29 576 al. Sublingual immunotherapy for the treatment of allergic rhinoconjunctivitis and asthma.  
30 577 JAMA 2013;309:1278-88.  
31  
32  
33 578 44. Pham-Thi N, Scheinmann P, Fadel R, Combebias A, Andre C. Assessment of  
34 579 sublingual immunotherapy efficacy in children with house dust mite-induced allergic asthma  
35 580 optimally controlled by pharmacologic treatment and mite-avoidance measures. *Pediatr*  
36 581 *Allergy Immunol* 2007; 18: 47-57.  
37  
38  
39  
40 582 45. Adkinson NF, Jr., Eggleston PA, Eney D, Goldstein EO, Schuberth KC, Bacon JR, et  
41 583 al. A controlled trial of immunotherapy for asthma in allergic children. *N Engl J Med*.  
42 584 1997;336(5):324-31.  
43  
44  
45 585 46. Altintas D, Akmanlar N, Guneser S, Burgut R, Yilmaz M, Bugdayci R, et al.  
46 586 Comparison between the use of adsorbed and aqueous immunotherapy material in  
47 587 *Dermatophagoides pteronyssinus* sensitive asthmatic children. *Allergol Immunopathol*  
48 588 (Madr). 1999;27(6):309-17.  
49  
50  
51 589 47. Dreborg S, Agrell B, Foucard T, Kjellman NI, Koivikko A, Nilsson S. A double-blind,  
52 590 multicenter immunotherapy trial in children, using a purified and standardized *Cladosporium*  
53 591 *herbarum* preparation. I. Clinical results. *Allergy*. 1986;41(2):131-40.  
54  
55  
56  
57  
58  
59  
60

- 1  
2  
3 592 48. Hill DJ, Hosking CS, Shelton MJ, Turner MW. Failure of hyposensitisation in  
4 593 treatment of children with grass-pollen asthma. *Br Med J (Clin Res Ed)*. 1982;284(6312):306-  
5 594 9.  
6  
7 595 49. Johnstone DE, Crump L. Value of hyposensitization therapy for perennial bronchial  
8 596 asthma in children. *Pediatrics*. 1961;27:39-44.  
9  
10 597 50. Johnstone DE, Dutton A. The value of hyposensitization therapy for bronchial asthma  
11 598 in children--a 14-year study. *Pediatrics*. 1968;42(5):793-802.  
12  
13 599 51. Price JF, Warner JO, Hey EN, Turner MW, Soothill JF. A controlled trial of  
14 600 hyposensitization with adsorbed tyrosine *Dermatophagoides pteronyssinus* antigen in  
15 601 childhood asthma: *in vivo* aspects. *Clin Allergy*. 1984;14(3):209-19.  
16  
17 602 52. Valovirta E, Koivikko A, Vanto T, Viander M, Ingeman L. Immunotherapy in allergy to  
18 603 dog: a double-blind clinical study. *Ann Allergy*. 1984;53(1):85-8.  
19  
20 604 53. Warner JO, Price JF, Soothill JF, Hey EN. Controlled trial of hyposensitisation to  
21 605 *Dermatophagoides pteronyssinus* in children with asthma. *Lancet*. 1978;2(8096):912-5.  
22  
23 606 54. Bahceciler NN, Isik U, Barlan IB, Basaran MM. Efficacy of sublingual immunotherapy  
24 607 in children with asthma and rhinitis: a double-blind, placebo-controlled study. *Pediatr*  
25 608 *Pulmonol*. 2001;32(1):49-55.  
26  
27 609 55. Hirsch T, Sahn M, Leupold W. Double-blind placebo-controlled study of sublingual  
28 610 immunotherapy with house dust mite extract (*D.pt.*) in children. *Pediatr Allergy Immunol*.  
29 611 1997;8(1):21-7.  
30  
31 612 56. Novembre E, Marano E, Bernardini R. Sublingual immunotherapy in the treatment of  
32 613 allergic asthma in children: a controlled study. *Riv Ital Pediatr (IJP)*. 1991;17:75-8.  
33  
34 614 57. Pajno GB, Vita D, Parmiani S, Caminiti L, La Grutta S, Barberio G. Impact of  
35 615 sublingual immunotherapy on seasonal asthma and skin reactivity in children allergic to  
36 616 *Parietaria* pollen treated with inhaled fluticasone propionate. *Clin Exp Allergy*.  
37 617 2003;33(12):1641-7.  
38  
39 618 58. Pajno GB, Passalacqua G, Vita D, Caminiti L, Parmiani S, Barberio G. Sublingual  
40 619 immunotherapy abrogates seasonal bronchial hyperresponsiveness in children with  
41 620 *Parietaria*-induced respiratory allergy: a randomized controlled trial. *Allergy*. 2004;59(8):883-  
42 621 7.  
43  
44 622 59. Rodriguez Santos O. [Sublingual immunotherapy with allergenic extract of  
45 623 *Dermatophagoides pteronyssinus* in asthmatic children]. *Rev Alerg Mex*. 2004;51(5):177-80.  
46  
47 624 60. Rolinck-Werninghaus C, Wolf H, Liebke C, Baars JC, Lange J, Kopp MV, et al. A  
48 625 prospective, randomized, double-blind, placebo-controlled multi-centre study on the efficacy  
49 626 and safety of sublingual immunotherapy (SLIT) in children with seasonal allergic  
50 627 rhinoconjunctivitis to grass pollen. *Allergy*. 2004;59(12):1285-93.  
51  
52  
53  
54  
55  
56  
57  
58  
59  
60

- 1  
2  
3 628 61. Yuksel H, Tanac R, Gousseinov A, Demir E. Sublingual immunotherapy and influence  
4 629 on urinary leukotrienes in seasonal pediatric allergy. *J Investig Allergol Clin Immunol*.  
5 630 1999;9:305-13.  
6  
7 631 62. Caffarelli C, Sensi LG, Marcucci F. Preseasonal local allergoid immunotherapy to  
8 632 grass pollen in children: a double-blind, placebo-controlled, randomized trial. *Allergy*.  
9 633 2000;55:1142-7.  
10  
11 634 63. Ippoliti F, De Santis W, Volterrani A, Lenti L, Canitano N, Lucarelli S, et al.  
12 635 Immunomodulation during sublingual therapy in allergic children. *Pediatr Allergy Immunol*.  
13 636 2003;14(3):216-21.  
14  
15 637 64. Niu CK, Chen WY, Huang JL, Lue KH, Wang JY. Efficacy of sublingual  
16 638 immunotherapy with high-dose mite extracts in asthma: a multi-center, double-blind,  
17 639 randomized, and placebo-controlled study in Taiwan. *Respir Med*. 2006;100(8):1374-83.  
18  
19 640 65. Pajno GB, Morabito L, Barberio G, Parmiani S. Clinical and immunologic effects of  
20 641 long-term sublingual immunotherapy in asthmatic children sensitized to mites: a double-blind,  
21 642 placebo-controlled study. *Allergy*. 2000;55(9):842-9.  
22  
23 643 66. Tari MG, Mancino M, Monti G. Efficacy of sublingual immunotherapy in patients with  
24 644 rhinitis and asthma due to house dust mite. A double-blind study. *Allergol Immunopathol*  
25 645 (Madr). 1990;18(5):277-84.  
26  
27 646 67. Vourdas D, Syrigou E, Potamianou P, Carat F, Batard T, André C, et al. Double-blind,  
28 647 placebo-controlled evaluation of sublingual immunotherapy with standardized olive pollen  
29 648 extract in pediatric patients with allergic rhinoconjunctivitis and mild asthma due to olive  
30 649 pollen sensitization. *Allergy* 1998;53:662-72.  
31  
32 650 68. van Essen-Zandvliet EE, Hughes MD, Waalkens HJ, Duiverman EJ, Pocock SJ,  
33 651 Kerrebijn KF. Effects of 22 months of treatment with inhaled corticosteroids and/or beta-2-  
34 652 agonists on lung function, airway responsiveness, and symptoms in children with asthma.  
35 653 The Dutch Chronic Non-specific Lung Disease Study Group. *Am Rev Respir Dis*.  
36 654 1992;146(3):547-54.  
37  
38 655 69. Cuello Garcia CA, Pachecho Alvaredo KP, Pérez Gaxiola G. Grading  
39 656 recommendations in clinical practice guidelines: randomised experimental evaluation of four  
40 657 different systems. *Arch Dis Child* 2011;96:723-8.  
41  
42 658 70. Canonica GW, Bousquet J, Casale T, Lockey RF, Baena-Cagnani CE, Pawankar R,  
43 659 et al. Sub-lingual immunotherapy: world allergy organization position paper 2009. *World*  
44 660 *Allergy Organ J*. 2009;2(11):233-8  
45  
46 661 71. Normansell R, Kew KM, Bridgman AL. Sublingual immunotherapy for asthma.  
47 662 *Cochrane Database Syst Rev*. 2015(8):CD011293.  
48  
49  
50  
51  
52  
53  
54  
55  
56  
57  
58  
59  
60

1  
2  
3 664 **Figure legends**  
4

5 665 Figure 1. Literature search and selection  
6

7 666 Figure 2. Meta-analysis of SCIT vs. placebo, outcome asthma symptoms. *Abbreviations: SD:*  
8 667 *Standard deviation; Std: Standardized; IV: inverse variance; random: random effect model; 95%CI: 95%*  
9 668 *Confidence Interval*  
10

11 669 Figure 3. Meta-analysis of SCIT vs. placebo, outcome asthma exacerbations. *Abbreviations:*  
12 670 *95%CI: 95% Confidence Interval; Fixed: Fixed effect model; M-H: Mantel-Haenszel*  
13  
14  
15  
16  
17  
18  
19  
20  
21  
22  
23  
24  
25  
26  
27  
28  
29  
30  
31  
32  
33  
34  
35  
36  
37  
38  
39  
40  
41  
42  
43  
44  
45  
46  
47  
48  
49  
50  
51  
52  
53  
54  
55  
56  
57  
58  
59  
60

For peer review only

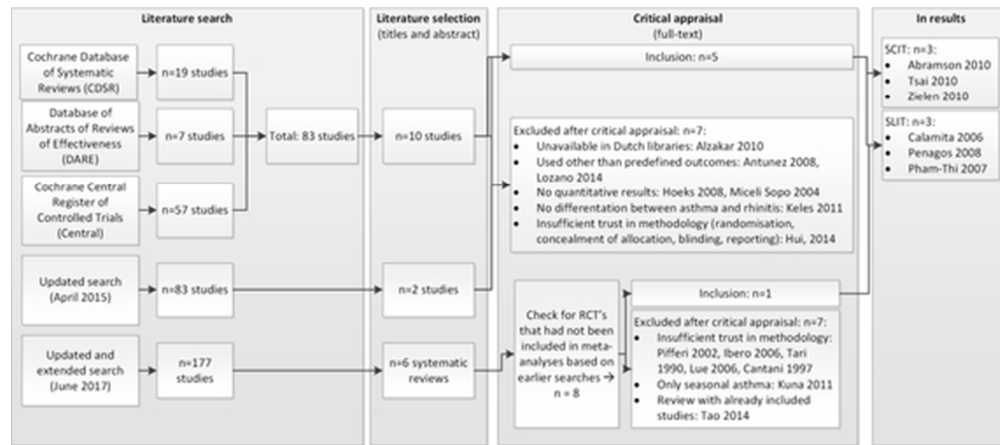

Literature search and selection

24x10mm (600 x 600 DPI)



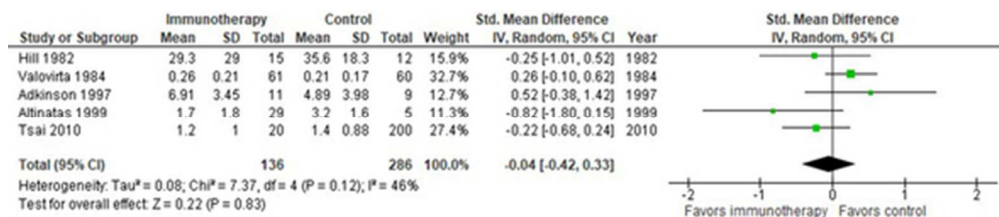

Figure 2. Meta-analysis of SCIT vs. placebo, outcome asthma symptoms. Abbreviations: SD: Standard deviation; Std: Standardized; IV: inverse variance; random: random effect model; 95%CI: 95% Confidence Interval

50x10mm (300 x 300 DPI)

peer review only



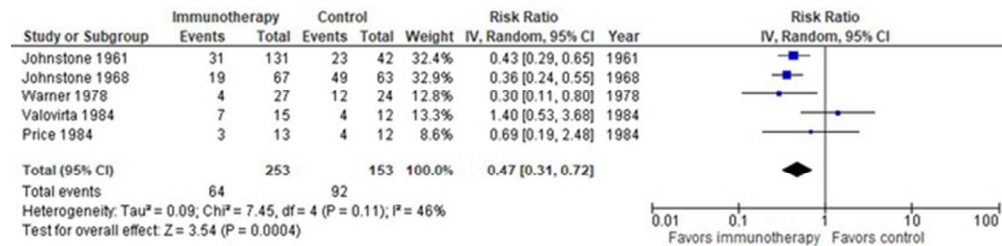

Figure 3. Meta-analysis of SCIT vs. placebo, outcome asthma exacerbations. Abbreviations: 95%CI: 95% Confidence Interval; Fixed: Fixed effect model; M-H: Mantel-Haenszel

54x13mm (300 x 300 DPI)

**Table E1. Literature search**

| <b>Search Cochrane Databases of Systematic Reviews, Database of Abstracts of Reviews of Effectiveness, and Central; Literature search 2015, April 25<sup>th</sup></b> |                                                                                                                                                                                                                                    |
|-----------------------------------------------------------------------------------------------------------------------------------------------------------------------|------------------------------------------------------------------------------------------------------------------------------------------------------------------------------------------------------------------------------------|
| 1.                                                                                                                                                                    | "asthmazoeacties jan 2012".ti. (0)                                                                                                                                                                                                 |
| 2.                                                                                                                                                                    | asthma.tw. (14671)                                                                                                                                                                                                                 |
| 3.                                                                                                                                                                    | Bronchial Spasm.tw. (15)                                                                                                                                                                                                           |
| 4.                                                                                                                                                                    | asthma*.tw. (17541)                                                                                                                                                                                                                |
| 5.                                                                                                                                                                    | wheez*.tw. (869)                                                                                                                                                                                                                   |
| 6.                                                                                                                                                                    | bronchospas*.tw. (777)                                                                                                                                                                                                             |
| 7.                                                                                                                                                                    | (bronch* adj8 spas*).tw. (52)                                                                                                                                                                                                      |
| 8.                                                                                                                                                                    | bronchoconstrict*.tw. (1663)                                                                                                                                                                                                       |
| 9.                                                                                                                                                                    | (bronch* adj8 constrict*).tw. (71)                                                                                                                                                                                                 |
| 10.                                                                                                                                                                   | airway* inflammation*.tw. (704)                                                                                                                                                                                                    |
| 11.                                                                                                                                                                   | or/2-10 (18894)                                                                                                                                                                                                                    |
| 12.                                                                                                                                                                   | immunotherap*.kw,tw. (2803)                                                                                                                                                                                                        |
| 13.                                                                                                                                                                   | 11 and 12 (473)                                                                                                                                                                                                                    |
| 14.                                                                                                                                                                   | subcutaneou*.kw,tw. (8020)                                                                                                                                                                                                         |
| 15.                                                                                                                                                                   | 12 and 14 (259)                                                                                                                                                                                                                    |
| 16.                                                                                                                                                                   | 15 (259)                                                                                                                                                                                                                           |
| 17.                                                                                                                                                                   | limit 16 to yr="2008 -Current" (57)                                                                                                                                                                                                |
| <b>Search Medline 2017, June, 2<sup>nd</sup></b>                                                                                                                      |                                                                                                                                                                                                                                    |
| 1                                                                                                                                                                     | "Effect of one-year subcutaneous and sublingual immunotherapy on clinical and laboratory parameters in children with rhinitis and asthma: a randomized, placebo-controlled, double-blind, double-dummy study".fc_titl. (1)         |
| 2                                                                                                                                                                     | "A double-blind, placebo-controlled study of house dust mite immunotherapy in Chinese asthmatic patients".fc_titl. (1)                                                                                                             |
| 3                                                                                                                                                                     | "Effect of specific immunotherapy added to pharmacologic treatment and allergen avoidance in asthmatic patients allergic to house dust mite".fc_titl. (1)                                                                          |
| 4                                                                                                                                                                     | "abramson\$.fc_auts. and "Injection allergen immunotherapy for asthma".fc_titl. (1)                                                                                                                                                |
| 5                                                                                                                                                                     | "Efficacy of sublingual immunotherapy in asthma: systematic review of randomized-clinical trials using the Cochrane Collaboration method".fc_titl. (1)                                                                             |
| 6                                                                                                                                                                     | "Metaanalysis of the efficacy of sublingual immunotherapy in the treatment of allergic asthma in pediatric patients".fc_titl. (1)                                                                                                  |
| 7                                                                                                                                                                     | "Normansell\$.fc_auts. and "Sublingual immunotherapy for asthma".fc_titl. (1)                                                                                                                                                      |
| 8                                                                                                                                                                     | "Efficacy of sublingual immunotherapy in patients with rhinitis and asthma due to house dust mite. A double-blind study".fc_titl. (1)                                                                                              |
| 9                                                                                                                                                                     | "Double-blind, placebo-controlled evaluation of sublingual immunotherapy with standardized olive pollen extract in pediatric ".fc_titl. (1)                                                                                        |
| 10                                                                                                                                                                    | "Clinical and immunologic effects of long-term sublingual immunotherapy in asthmatic children sensitized to mites: a double-blind, placebo-controlled ".fc_titl. (1)                                                               |
| 11                                                                                                                                                                    | "Efficacy of sublingual immunotherapy with high-dose mite extracts in asthma: a multi-center, double-blind, randomized, and placebo-controlled study in Taiwan".fc_titl. (1)                                                       |
| 12                                                                                                                                                                    | "Immunomodulation during sublingual therapy in allergic children".fc_titl. (1)                                                                                                                                                     |
| 13                                                                                                                                                                    | "Preseasonal local allergoid immunotherapy to grass pollen in children: a double-blind, placebo-controlled, randomized trial".fc_titl. (1)                                                                                         |
| 14                                                                                                                                                                    | "Sublingual immunotherapy and influence on urinary leukotrienes in seasonal pediatric allergy".fc_titl. (1)                                                                                                                        |
| 15                                                                                                                                                                    | "A prospective, randomized, double-blind, placebo-controlled multi-centre study on the efficacy and safety of sublingual immunotherapy (SLIT) in children with seasonal allergic rhinoconjunctivitis to grass pollen".fc_titl. (1) |
| 16                                                                                                                                                                    | "Sublingual immunotherapy with allergenic extract of Dermatophagoides pteronyssinus in asthmatic children".fc_titl. (1)                                                                                                            |
| 17                                                                                                                                                                    | "Sublingual immunotherapy abrogates seasonal bronchial hyperresponsiveness in children with Parietaria-induced respiratory allergy: a randomized controlled trial. ".fc_titl. (1)                                                  |
| 18                                                                                                                                                                    | "Impact of sublingual immunotherapy on seasonal asthma and skin reactivity in children allergic to Parietaria pollen treated with ".fc_titl. (1)                                                                                   |

19 "Double-blind placebo-controlled study of sublingual immunotherapy with house dust mite extract  
".fc\_titl. (1)

20 "Efficacy of sublingual immunotherapy in children with asthma and rhinitis: a double-blind, placebo-  
controlled study. ".fc\_titl. (1)

21 or/1-3 (3)

22 or/4-20 (17)

23 21 or 22 (20)

24 "controle refs slit scit".ti. (0)

25 asthma/ or bronchial spasm/ (118686)

26 (asthma\* or wheez\* or bronchospas\* or bronchoconstrict\* or (airway\* adj inflammat\*)).tw. (155964)

27 (asthma\* or wheez\* or bronchospas\* or bronchoconstrict\* or (airway\* adj inflammat\*)).kf. (15593)

28 or/25-27 (176447)

29 23 and 28 (19)

30 23 not 29 (1)

31 rhinitis, allergic, perennial/ or rhinitis, allergic, seasonal/ (18469)

32 **28 or 31 (188701)=P**

33 Immunotherapy/ (36085)

34 Sublingual Immunotherapy/ (231)

35 Desensitization, Immunologic/ (9795)

36 (SCIT or SLIT or (sublingual adj1 immunotherap\*) or (subcutaneous adj1 immunotherap\*)).tw. (16817)

37 (SCIT or SLIT or (sublingual adj1 immunotherap\*) or (subcutaneous adj1 immunotherap\*)).kf. (442)

38 or/33-37 (61196)

39 "Injections, Subcutaneous"/ (31338)

40 33 and 39 (294)

41 **34 or 35 or 36 or 37 or 40 (26000)=I**

42 28 and 41 (3043)

43 "filter systematic reviews".ti. (0)

44 meta analysis.pt. (81124)

45 (meta-anal\$ or metaanal\$).af. (144025)

46 (quantitativ\$ adj10 (review\$ or overview\$)).tw. (6863)

47 (systematic\$ adj10 (review\$ or overview\$)).tw. (119262)

48 (methodologic\$ adj10 (review\$ or overview\$)).tw. (9132)

49 (quantitativ\$ adj10 (review\$ or overview\$)).kf. (32)

50 (systematic\$ adj10 (review\$ or overview\$)).kf. (8208)

51 (methodologic\$ adj10 (review\$ or overview\$)).kf. (36)

52 medline.tw. and review.pt. (64452)

53 (pooled adj3 analy\*).tw. (14081)

54 (pooled adj3 analy\*).kf. (128)

55 "cochrane\$".fc\_jour. (13410)

56 **or/44-55 (258042)**

57 randomized-controlled-trial.pt. (465042)

58 controlled-clinical-trial.pt. (94188)

59 randomized controlled trial/ (465042)

60 randomi?ed controlled trial?.tw. (131360)

61 random-allocation.tw,kf. (1445)

62 double-blind-method.tw,kf. (456)

63 single-blind-method.tw,kf. (81)

64 (random adj8 (selection? or sample?)).tw. (40888)

65 random\$.tw. (952984)

66 **or/57-65 (1156986)**

67 "rct filter sprec".ti. (0)

68 (child??? or childhood or infant\* or p?ediatr\* or perinat\* or neonat\* or newborn\* or infan\* or boy? or  
girl? or kid? or schoolage\* or juvenil\* or adolescen\* or toddler?).tw. (2058217)

69 exp Child/ (1759435)

70 exp infant/ (1058929)

71 "Adolescent"/ (1847650)

72 **or/68-71 (3858822)**

|                                                 |                                                                                                                                                                                                                                    |
|-------------------------------------------------|------------------------------------------------------------------------------------------------------------------------------------------------------------------------------------------------------------------------------------|
| 73                                              | "filter child".ti. (0)                                                                                                                                                                                                             |
| 74                                              | 23 and 72 (19)                                                                                                                                                                                                                     |
| 75                                              | 23 not 74 (1)                                                                                                                                                                                                                      |
| 76                                              | 32 and 41 and 56 (184)                                                                                                                                                                                                             |
| 77                                              | <b>32 and 41 and 72 and 56 (90) systrev</b>                                                                                                                                                                                        |
| <b>Search Embase 2017, June, 2<sup>nd</sup></b> |                                                                                                                                                                                                                                    |
| 1                                               | asthma/ (202909)                                                                                                                                                                                                                   |
| 2                                               | bronchospasm/ (25054)                                                                                                                                                                                                              |
| 3                                               | bronchoconstriction/ (1300)                                                                                                                                                                                                        |
| 4                                               | respiratory tract inflammation/ or allergic airway inflammation/ (11606)                                                                                                                                                           |
| 5                                               | (asthma* or wheez* or bronchospas* or bronchoconstrict* or (airway* adj inflammat*)).tw. (215497)                                                                                                                                  |
| 6                                               | (asthma* or wheez* or bronchospas* or bronchoconstrict* or (airway* adj inflammat*)).kw. (51383)                                                                                                                                   |
| 7                                               | perennial rhinitis/ (3627)                                                                                                                                                                                                         |
| 8                                               | <b>or/1-7 (279683)=P</b>                                                                                                                                                                                                           |
| 9                                               | sublingual immunotherapy/ (1695)                                                                                                                                                                                                   |
| 10                                              | immunotherapy/ (67533)                                                                                                                                                                                                             |
| 11                                              | subcutaneous drug administration/ (97428)                                                                                                                                                                                          |
| 12                                              | 10 and 11 (1148)                                                                                                                                                                                                                   |
| 13                                              | subcutaneous immunotherapy/ (1226)                                                                                                                                                                                                 |
| 14                                              | (SCIT or SLIT or (sublingual adj1 immunotherap*) or (subcutaneous adj1 immunotherap*)).tw. (19513)                                                                                                                                 |
| 15                                              | (SCIT or SLIT or (sublingual adj1 immunotherap*) or (subcutaneous adj1 immunotherap*)).kw. (1765)                                                                                                                                  |
| 16                                              | <b>9 or 12 or 13 or 14 or 15 (21563)=I</b>                                                                                                                                                                                         |
| 17                                              | 8 and 16 (2229)                                                                                                                                                                                                                    |
| 18                                              | "Effect of one-year subcutaneous and sublingual immunotherapy on clinical and laboratory parameters in children with rhinitis and asthma: a randomized, placebo-controlled, double-blind, double-dummy study".fc_titl. (1)         |
| 19                                              | "A double-blind, placebo-controlled study of house dust mite immunotherapy in Chinese asthmatic patients".fc_titl. (1)                                                                                                             |
| 20                                              | "Effect of specific immunotherapy added to pharmacologic treatment and allergen avoidance in asthmatic patients allergic to house dust mite".fc_titl. (1)                                                                          |
| 21                                              | "abramson\$".fc_auts. and "Injection allergen immunotherapy for asthma".fc_titl. (1)                                                                                                                                               |
| 22                                              | "Efficacy of sublingual immunotherapy in asthma: systematic review of randomized-clinical trials using the Cochrane Collaboration method".fc_titl. (1)                                                                             |
| 23                                              | "Metaanalysis of the efficacy of sublingual immunotherapy in the treatment of allergic asthma in pediatric patients".fc_titl. (1)                                                                                                  |
| 24                                              | "Normansell\$".fc_auts. and "Sublingual immunotherapy for asthma".fc_titl. (1)                                                                                                                                                     |
| 25                                              | "Efficacy of sublingual immunotherapy in patients with rhinitis and asthma due to house dust mite. A double-blind study".fc_titl. (1)                                                                                              |
| 26                                              | "Double-blind, placebo-controlled evaluation of sublingual immunotherapy with standardized olive pollen extract in pediatric ".fc_titl. (1)                                                                                        |
| 27                                              | "Clinical and immunologic effects of long-term sublingual immunotherapy in asthmatic children sensitized to mites: a double-blind, placebo-controlled ".fc_titl. (1)                                                               |
| 28                                              | "Efficacy of sublingual immunotherapy with high-dose mite extracts in asthma: a multi-center, double-blind, randomized, and placebo-controlled study in Taiwan".fc_titl. (1)                                                       |
| 29                                              | "Immunomodulation during sublingual therapy in allergic children".fc_titl. (1)                                                                                                                                                     |
| 30                                              | "Preseasonal local allergoid immunotherapy to grass pollen in children: a double-blind, placebo-controlled, randomized trial".fc_titl. (1)                                                                                         |
| 31                                              | "Sublingual immunotherapy and influence on urinary leukotrienes in seasonal pediatric allergy".fc_titl. (1)                                                                                                                        |
| 32                                              | "A prospective, randomized, double-blind, placebo-controlled multi-centre study on the efficacy and safety of sublingual immunotherapy (SLIT) in children with seasonal allergic rhinoconjunctivitis to grass pollen".fc_titl. (2) |
| 33                                              | "Sublingual immunotherapy with allergenic extract of Dermatophagoides pteronyssinus in asthmatic children".fc_titl. (2)                                                                                                            |
| 34                                              | "Sublingual immunotherapy abrogates seasonal bronchial hyperresponsiveness in children with Parietaria-induced respiratory allergy: a randomized controlled trial. ".fc_titl. (1)                                                  |

|    |                                                                                                           |
|----|-----------------------------------------------------------------------------------------------------------|
| 1  |                                                                                                           |
| 2  |                                                                                                           |
| 3  |                                                                                                           |
| 4  | 35 "Impact of sublingual immunotherapy on seasonal asthma and skin reactivity in children allergic to     |
| 5  | Parietaria pollen treated with ".fc_titl. (1)                                                             |
| 6  | 36 "Double-blind placebo-controlled study of sublingual immunotherapy with house dust mite extract        |
| 7  | ".fc_titl. (1)                                                                                            |
| 8  | 37 "Efficacy of sublingual immunotherapy in children with asthma and rhinitis: a double-blind, placebo-   |
| 9  | controlled study. ".fc_titl. (1)                                                                          |
| 10 | 38 or/18-20 (3)                                                                                           |
| 11 | 39 or/21-37 (19)                                                                                          |
| 12 | 40 38 or 39 (22)                                                                                          |
| 13 | 41 "controle refs slit scit".ti. (0)                                                                      |
| 14 | 42 "filter systematic reviews & meta-analyses Embase".ti. (0)                                             |
| 15 | 43 meta analysis/ (127495)                                                                                |
| 16 | 44 "systematic review"/ (139284)                                                                          |
| 17 | 45 (meta-analy\$ or metaanaly\$).tw. (145912)                                                             |
| 18 | 46 (systematic\$ adj4 (review\$ or overview\$)).tw. (139834)                                              |
| 19 | 47 (quantitativ\$ adj5 (review? or overview?)).tw. (3786)                                                 |
| 20 | 48 (methodologic adj5 (overview? or review?)).tw. (325)                                                   |
| 21 | 49 (review\$ adj3 (database? or medline or embase or cinahl)).tw. (19428)                                 |
| 22 | 50 (pooled adj3 analy\$).tw. (20108)                                                                      |
| 23 | 51 (extensive adj3 review\$ adj3 literature).tw. (2903)                                                   |
| 24 | 52 (meta or synthesis or (literature adj8 database?) or extraction).tw. (1197812)                         |
| 25 | 53 review.pt. (2259303)                                                                                   |
| 26 | 54 52 and 53 (112526)                                                                                     |
| 27 | 55 (systematic\$ adj4 (review\$ or overview\$)).kw. (16750)                                               |
| 28 | 56 (quantitativ\$ adj5 (review? or overview?)).kw. (48)                                                   |
| 29 | 57 (pooled adj3 analy\$).kw. (354)                                                                        |
| 30 | 58 or/43-51,54-57 (381419)                                                                                |
| 31 | 59 "filter rct embase".ti. (0)                                                                            |
| 32 | 60 controlled clinical trial/ or randomized controlled trial/ (614267)                                    |
| 33 | 61 randomization/ (73811)                                                                                 |
| 34 | 62 Major Clinical Study/ (2803898)                                                                        |
| 35 | 63 random\$.tw. (1196822)                                                                                 |
| 36 | 64 Double Blind Procedure/ (139034)                                                                       |
| 37 | 65 or/60-64 (3916117)                                                                                     |
| 38 | 66 "einde filter rct embase".ti. (0)                                                                      |
| 39 | 67 (child??? or childhood or infant* or p?ediatr* or perinat* or neonat* or newborn* or infan* or boy? or |
| 40 | girl? or kid? or schoolage* or juvenil* or adolescen* or toddler?).tw. (2468214)                          |
| 41 | 68 child/ (1526632)                                                                                       |
| 42 | 69 infant/ (566151)                                                                                       |
| 43 | 70 adolescent/ (1414197)                                                                                  |
| 44 | 71 or/67-70 (3656088)                                                                                     |
| 45 | <b>72 17 and 58 and 71 (85) systrev</b>                                                                   |
| 46 | 73 (17 and 65 and 71) not 58 (370) rct                                                                    |
| 47 | 74 17 and 58 (208)                                                                                        |
| 48 | 75 74 not 72 (123)                                                                                        |
| 49 | 76 75 (123)                                                                                               |
| 50 | 77 limit 76 to yr="2016 -Current" (14)                                                                    |
| 51 | 78 76 (123)                                                                                               |
| 52 | <b>79 limit 78 to yr="2015 -Current" (31) extra systrev</b>                                               |
| 53 | <b>Search Cochrane 2017, June, 2<sup>nd</sup></b>                                                         |
| 54 |                                                                                                           |
| 55 |                                                                                                           |
| 56 | #1 asthma*:ti,ab,kw 26843                                                                                 |
| 57 | #2 MeSH descriptor: [Asthma] this term only 9761                                                          |
| 58 | #3 MeSH descriptor: [Bronchial Spasm] explode all trees 360                                               |
| 59 | #4 wheez*:ti,ab,kw 1642                                                                                   |
| 60 | #5 bronchospas*:ti,ab,kw 1594                                                                             |
|    | #6 (bronch* near/8 spas*):ti,ab,kw 460                                                                    |
|    | #7 bronchoconstrict*:ti,ab,kw 2204                                                                        |

|                                                   |                                                                                                                                                                                                |        |
|---------------------------------------------------|------------------------------------------------------------------------------------------------------------------------------------------------------------------------------------------------|--------|
| #8                                                | (bronch* near/8 constrict*):ti,ab,kw                                                                                                                                                           | 121    |
| #9                                                | (airway* near/1 inflammation*):ti,ab,kw                                                                                                                                                        | 1236   |
| #10                                               | #1 or #2 or #3 or #4 or #5 or #6 or #7 or #8 or #9                                                                                                                                             | 28980  |
| #11                                               | (perennial or seasonal or allergen* or hyposensiti*):ti,ab,kw                                                                                                                                  | 10214  |
| #12                                               | immunotherap*:ti,ab,kw                                                                                                                                                                         | 6399   |
| #13                                               | MeSH descriptor: [Immunotherapy] this term only                                                                                                                                                | 1140   |
| #14                                               | (SCIT or SLIT or (sublingual near/1 immunotherap*) or (subcutaneous near/1 immunotherap*)):ti,ab,kw                                                                                            | 2033   |
| #15                                               | #11 or #12 or #13 or #14                                                                                                                                                                       | 15912  |
| #16                                               | #10 and #15                                                                                                                                                                                    | 3351   |
| #17                                               | (child* or childhood or infant* or pediatr* or paediatric* or perinat* or neonat* or newborn* or infan* or boy* or girl* or kid* or schoolage* or juvenil* or adolescen* or toddler*):ti,ab,kw | 239918 |
| #18                                               | #16 and #17                                                                                                                                                                                    | 1570   |
| #19                                               | immunotherap*:ti,kw                                                                                                                                                                            | 5661   |
| #20                                               | subcutaneou*:ti,kw                                                                                                                                                                             | 12350  |
| #21                                               | (SCIT or SLIT or (sublingual near/1 immunotherap*) or (subcutaneous near/1 immunotherap*)):ti,kw                                                                                               | 1257   |
| #22                                               | #13 or #19 or #20 or #21                                                                                                                                                                       | 17830  |
| #23                                               | #18 and #22                                                                                                                                                                                    | 516    |
| #24                                               | (perennial or seasonal or allergen* or hypo-sensiti*):ti                                                                                                                                       | 5205   |
| #25                                               | #22 or #24                                                                                                                                                                                     | 22321  |
| #26                                               | #25 and #18                                                                                                                                                                                    | 927    |
| #27                                               | #16 and #22                                                                                                                                                                                    | 1071   |
| #28                                               | MeSH descriptor: [Injections, Subcutaneous] explode all trees                                                                                                                                  | 4017   |
| #29                                               | (#12 or #13) and (#20 or #28)                                                                                                                                                                  | 646    |
| #30                                               | #29 or #21 or #24                                                                                                                                                                              | 6616   |
| #31                                               | MeSH descriptor: [Desensitization, Immunologic] 2 tree(s) exploded                                                                                                                             | 872    |
| #32                                               | (#31 or #30) and #10                                                                                                                                                                           | 1961   |
| #33                                               | MeSH descriptor: [Child] explode all trees                                                                                                                                                     | 227    |
| #34                                               | MeSH descriptor: [Adolescent] explode all trees                                                                                                                                                | 90499  |
| #35                                               | MeSH descriptor: [Infant] explode all trees                                                                                                                                                    | 15066  |
| #36                                               | #17 or #33 or #34 or #35                                                                                                                                                                       | 239918 |
| #37                                               | #32 and #36                                                                                                                                                                                    | 816    |
| <b>Results</b>                                    |                                                                                                                                                                                                |        |
| Cochrane Databases of Systematic Reviews          |                                                                                                                                                                                                | 19     |
| Database of Abstracts of Reviews of Effectiveness |                                                                                                                                                                                                | 7      |
| Cochrane Central Trials Register                  |                                                                                                                                                                                                | 57     |
| emb20170602 scit slit systrev.                    |                                                                                                                                                                                                | 53     |
| emb20170602 scit slit extra vanaf2015systrev      |                                                                                                                                                                                                | 26     |
| med20170602 scit slit systrev.                    |                                                                                                                                                                                                | 89     |
| coc sr20170601 extra astma scit slit.             |                                                                                                                                                                                                | 4      |
| coc dare20170602                                  |                                                                                                                                                                                                | 5      |



Table E2. Evidence table systematic reviews (SCIT + SLIT)

|                                    | Abramson, 2010 <sup>16</sup>                                                                                                                                                                                                                 | Calamita, 2006 <sup>29</sup>                                                                                                                                                                         | Penagos, 2008 <sup>32</sup>                                                                                                                                                                                                                                                           |
|------------------------------------|----------------------------------------------------------------------------------------------------------------------------------------------------------------------------------------------------------------------------------------------|------------------------------------------------------------------------------------------------------------------------------------------------------------------------------------------------------|---------------------------------------------------------------------------------------------------------------------------------------------------------------------------------------------------------------------------------------------------------------------------------------|
| <b>Study design</b>                | Cochrane systematic review, consisting of 90 RCT's. 14 RCT's were carried out in children only; 24 were done in children and adults. The total study population (children and adults) consisted of 3.792 patients (of whom 3.459 had asthma) | Systematic review, consisting of 25 RCT's. Only 9 RCT's were carried out in children only. The total study population consisted of 1.706 patients (adults and children, with asthma and/or rhinitis) | Systematic review, consisting of 9 RCT's, all carried out in children. The total study population comprised 441 patients with asthma (seasonal, mild, moderate, and persistent)                                                                                                       |
| <b>Age (mean)</b>                  | Not specified, variation between included studies                                                                                                                                                                                            | Not specified, there is a limited description of the characteristics of the included studies                                                                                                         | Range specified per study, total range: 4-17 years                                                                                                                                                                                                                                    |
| <b>Setting (in RCT's)</b>          | -                                                                                                                                                                                                                                            | -                                                                                                                                                                                                    | -                                                                                                                                                                                                                                                                                     |
| <b>Diagnosis (asthma/rhinitis)</b> | Asthma                                                                                                                                                                                                                                       | Asthma and rhinitis                                                                                                                                                                                  | Asthma                                                                                                                                                                                                                                                                                |
| <b>Eligibility criteria</b>        | RCT's, patients with asthma, allergen specific subcutaneous immunotherapy (administration of extracts of house dust mites, pollens, animal danders or molds, chemically modified allergoids or antigen-antibody complexes)                   | RCT's, double blinded, and open studies, patients with asthma and/or rhinitis, sublingual immunotherapy (with or without swallowing, all types of allergen, all doses, all lengths of treatment)     | RCT's, double blinded, placebo controlled, patients ≤ 18 years, with a history of allergic asthma, with identified causal allergen, and proven IgE sensitization. Sublingual immunotherapy (with or without swallowing, all types of allergen, all doses, all durations of treatment) |
| <b>Type of immunotherapy</b>       | Subcutaneous immunotherapy (variation of allergen abstracts in different included studies)                                                                                                                                                   | Sublingual immunotherapy, mainly pollen and mite                                                                                                                                                     | Sublingual immunotherapy, mainly mites                                                                                                                                                                                                                                                |
| <b>Intervention</b>                | Subcutaneous immunotherapy                                                                                                                                                                                                                   | Sublingual immunotherapy, mainly pollen and mite                                                                                                                                                     | Sublingual immunotherapy (mainly mites, further: O europaea, Holcus, P pretense <i>Dermatophagoides pteronyssinus</i> , grass mix), great variation in duration, range: 3-32 months                                                                                                   |
| <b>Control</b>                     | Placebo                                                                                                                                                                                                                                      | Placebo                                                                                                                                                                                              | Placebo                                                                                                                                                                                                                                                                               |
| <b>Primary outcomes</b>            | Asthmatic symptoms<br>Asthma medication requirements<br>Lung function<br>Nonspecific bronchial hyper-reactivity<br>Allergen specific bronchial hyper-reactivity                                                                              | Asthmatic symptoms (symptom score)<br>Asthmatic medication requirement<br>Respiratory function tests (PEFR, FEV <sub>1</sub> , FEF25-75%)<br>Nonspecific bronchial provocation<br>Adverse effects    | Asthma symptoms<br>Medication scores                                                                                                                                                                                                                                                  |
| <b>Secondary outcomes</b>          | Local reactions<br>Systemic reactions                                                                                                                                                                                                        | -                                                                                                                                                                                                    |                                                                                                                                                                                                                                                                                       |

|                |                                                                                                                     |                                                                   |   |
|----------------|---------------------------------------------------------------------------------------------------------------------|-------------------------------------------------------------------|---|
| <b>Comment</b> | The results have not been presented separately for children in the review. We conducted new suitable meta-analyses. | The authors mentioned they used the Cochrane Collaboration method | - |
|----------------|---------------------------------------------------------------------------------------------------------------------|-------------------------------------------------------------------|---|

Abbreviations: FEF25-75: maximum mid expiratory flow; FEV<sub>1</sub>: forced expiratory volume in 1 second; PEFr: peak expiratory flow rate; RCT: randomized controlled trial; SCIT: subcutaneous immunotherapy; SLIT: sublingual immunotherapy

For peer review only



Table E3. Evidence table SCIT studies

| Author, date                        | Study design                                                                                | Setting    | Eligibility | Participants (number, gender, age, and descriptive)                                                     | Asthma type,* severity (e.g. on ICS?)                                                     | Allergy type (mono/multi, allergens,                     | Intervention (type, dose, duration)                                                                                         | Control | Follow-up (from start | Outcomes                                                                                   | Results reported by author†                                                                  | Critical appraisal‡                                                                   | Comments                                                                                                     |
|-------------------------------------|---------------------------------------------------------------------------------------------|------------|-------------|---------------------------------------------------------------------------------------------------------|-------------------------------------------------------------------------------------------|----------------------------------------------------------|-----------------------------------------------------------------------------------------------------------------------------|---------|-----------------------|--------------------------------------------------------------------------------------------|----------------------------------------------------------------------------------------------|---------------------------------------------------------------------------------------|--------------------------------------------------------------------------------------------------------------|
| <b>Adkinson, 1997</b> <sup>45</sup> | Double blind, placebo controlled, parallel group RCT Placebo caramelized saline + histamine | ?          |             | 121 allergic children with perennial asthma Mean age 9.2 (range 5.4 to 14) years, 79% boys              | Perennial asthma 41% ICS, 2% systemic                                                     | 80% dust mite, 77% ragweed, 69% rye grass                | Subcutaneous multiple allergen immunotherapy Median 6 (range 2 to 7) allergen extracts                                      | Placebo | ?                     | Symptom scores Medication scores PEF rates Nonspecific BHR (methacholin FEV <sub>1</sub> ) | SCIT not useful in moderate to severe perennial allergic asthma                              | Study useful, however low rate of ICS                                                 | Allocation concealment unclear                                                                               |
| <b>Altintas, 1999</b> <sup>46</sup> | Open placebo controlled RCT multiple groups                                                 | university |             | 34 poorly controlled mild to moderate asthmatics aged 4 to 18 years; 30 patients in 3 groups, 4 placebo | ICS use not specified, no medical details on asthma                                       | Mono-sensitization <i>Dermatophagoides pteronyssinus</i> | Subcutaneous immunotherapy with adsorbed or aqueous <i>Dermatophagoides pteronyssinus</i> extracts (in different dilutions) | Placebo |                       | Symptom medication score IgE and IgG4 level Bronchial provocation tests                    | SCIT is useful and safe; no conclusion on asthma                                             | Study not useful No data on ICS,                                                      | Allocation concealment unclear Study designed to compare 3 different abstracts of immunotherapy              |
| <b>Dreborg, 1986</b> <sup>47</sup>  | RCT, double blind Freeze dried caramelized histamine placebo                                | European   |             | 30 children with <i>Cladosporium</i> allergy, aged 5 to 17 years                                        | Clinical history suggesting mold-induced asthma and/or rhinoconjunctivitis ICS not stated | <i>Cladosporium</i> allergy                              | 10 months <i>Cladosporium</i> subcutaneous immunotherapy Or placebo                                                         | Placebo |                       | Symptoms Medication PEF (no SD reported) Allergen specific BHR                             | Decrease in medication score, but not in symptom score Lower medication score in verum group | Study not useful No information on asthma medication No fixed study medication scheme | Allocation concealment unclear Asthma diagnosis not specified, (worsening of asthma in the <i>Cladospori</i> |

|                                                                               |                                      |                                                             |                                |                                                                                                                        |                                                      |  |                                                                                        |         |  |                                                                       |                                                                                                                                                               |                                                       |                                                                                                                              |
|-------------------------------------------------------------------------------|--------------------------------------|-------------------------------------------------------------|--------------------------------|------------------------------------------------------------------------------------------------------------------------|------------------------------------------------------|--|----------------------------------------------------------------------------------------|---------|--|-----------------------------------------------------------------------|---------------------------------------------------------------------------------------------------------------------------------------------------------------|-------------------------------------------------------|------------------------------------------------------------------------------------------------------------------------------|
|                                                                               |                                      |                                                             |                                |                                                                                                                        |                                                      |  |                                                                                        |         |  |                                                                       |                                                                                                                                                               | um season)                                            |                                                                                                                              |
| 1<br>2<br>3<br>4<br>5<br>6<br>7<br>8<br>9<br>10<br>11<br>12<br>13<br>14<br>15 | <b>Hill, 1982</b> <sup>48</sup>      | Single blind RCT, rye grass pollen placebo                  | University Australia           | 20 asthmatic children, aged 9 to 14 years, with rye grass pollen allergy, positive at bronchoprovocation               | ICS N=1 beclomethasone N=8 cromoglycate              |  | Subcutaneous immunotherapy with aqueous rye grass pollen extract                       | Placebo |  | Symptoms Medications (medians only reported, no SD)                   | no evidence that limited hyposensitization with a pollen extract is of any clinical benefit in seasonal asthma despite evidence of an immunological response. | Study not useful Primary outcome = IgE and IgG levels | No allocation concealment                                                                                                    |
| 16<br>17<br>18<br>19<br>20<br>21<br>22<br>23<br>24<br>25<br>26<br>27<br>28    | <b>Johnstone, 1961</b> <sup>49</sup> | RCT, double blind, 4-year follow up Buffered saline control | United States general hospital | 173 children with perennial asthma Severity = number of days of wheeze/year Placebo: n=41                              | No medication mentioned at all, no medication scores |  | Subcutaneous immunotherapy with relevant allergen extracts, administered by 3 regimens | Placebo |  | Asthma symptoms reported by mother Number of new allergies developing | Less new allergies developing Less symptoms and asthma attacks in the last year in the group 4                                                                | Study not useful No asthma medication scores          | Allocation concealment unclear 4 different groups, 1 placebo (n=41) Group 2-4 different strength SCIT Last year single blind |
| 29<br>30<br>31<br>32<br>33<br>34<br>35<br>36<br>37<br>38<br>39                | <b>Johnstone, 1968</b> <sup>50</sup> | RCT, double blind Buffered saline control                   |                                | 130 children with perennial asthma; Severity = number of days of wheeze/year RCT, double blind Buffered saline control | No medication mentioned, no medication scores        |  | Subcutaneous immunotherapy with relevant allergens administered by 3 regimens          | Placebo |  | Asthma symptoms reported by mother                                    | More children in SCIT group high dose overgrowing asthma at the age of 16 than placebo                                                                        | Study not useful No asthma medication scores          | Allocation concealment unclear 14-years follow up of Johnstone 1961                                                          |
| 40<br>41<br>42<br>43<br>44<br>45<br>46<br>47                                  | <b>Price, 1984</b> <sup>51</sup>     | RCT, double blind                                           |                                | 25 children with perennial asthma, aged 5 to 15 years                                                                  | Asthma severity not specified asthma                 |  | Subcutaneous immunotherapy with <i>Dermatophag</i>                                     | Placebo |  | Symptoms Medication Lung function Bronchoprovocation                  | Loss of late reaction on bronchoprovocation Only one out of 6                                                                                                 | Study not useful Bronchoprovocation is                | Continuation of study by Warner 1978 for second                                                                              |

|    |                                      |                                                     |                             |                                                                                                                                          |                                                                                            |                                                             |                                                                                                                                                                                                                                                                                                                                                    |                 |                           |                                                                                                                                              |                                                                                                                                                                                                                                                                                                                                                                                               |                                                                   |                                                                        |
|----|--------------------------------------|-----------------------------------------------------|-----------------------------|------------------------------------------------------------------------------------------------------------------------------------------|--------------------------------------------------------------------------------------------|-------------------------------------------------------------|----------------------------------------------------------------------------------------------------------------------------------------------------------------------------------------------------------------------------------------------------------------------------------------------------------------------------------------------------|-----------------|---------------------------|----------------------------------------------------------------------------------------------------------------------------------------------|-----------------------------------------------------------------------------------------------------------------------------------------------------------------------------------------------------------------------------------------------------------------------------------------------------------------------------------------------------------------------------------------------|-------------------------------------------------------------------|------------------------------------------------------------------------|
| 1  |                                      | Saline placebo control                              |                             |                                                                                                                                          | medication not specified                                                                   |                                                             | <i>oides pteronyssinus</i> extracts                                                                                                                                                                                                                                                                                                                |                 |                           |                                                                                                                                              | children with severe asthma improved                                                                                                                                                                                                                                                                                                                                                          | surrogate outcome;                                                | year with placebo group crossed over to active immunotherapy           |
| 2  |                                      |                                                     |                             |                                                                                                                                          |                                                                                            |                                                             |                                                                                                                                                                                                                                                                                                                                                    |                 |                           |                                                                                                                                              |                                                                                                                                                                                                                                                                                                                                                                                               |                                                                   |                                                                        |
| 3  |                                      |                                                     |                             |                                                                                                                                          |                                                                                            |                                                             |                                                                                                                                                                                                                                                                                                                                                    |                 |                           |                                                                                                                                              |                                                                                                                                                                                                                                                                                                                                                                                               |                                                                   |                                                                        |
| 4  |                                      |                                                     |                             |                                                                                                                                          |                                                                                            |                                                             |                                                                                                                                                                                                                                                                                                                                                    |                 |                           |                                                                                                                                              |                                                                                                                                                                                                                                                                                                                                                                                               |                                                                   |                                                                        |
| 5  |                                      |                                                     |                             |                                                                                                                                          |                                                                                            |                                                             |                                                                                                                                                                                                                                                                                                                                                    |                 |                           |                                                                                                                                              |                                                                                                                                                                                                                                                                                                                                                                                               |                                                                   |                                                                        |
| 6  |                                      |                                                     |                             |                                                                                                                                          |                                                                                            |                                                             |                                                                                                                                                                                                                                                                                                                                                    |                 |                           |                                                                                                                                              |                                                                                                                                                                                                                                                                                                                                                                                               |                                                                   |                                                                        |
| 7  |                                      |                                                     |                             |                                                                                                                                          |                                                                                            |                                                             |                                                                                                                                                                                                                                                                                                                                                    |                 |                           |                                                                                                                                              |                                                                                                                                                                                                                                                                                                                                                                                               |                                                                   |                                                                        |
| 8  | <b>Tsai, 2010</b> <sup>34</sup>      | RCT, no blinding, no intervention in control group  | University hospital, Taiwan | 40 children (21 boys), aged 5-14 years (average 8,5) >1 year moderate persistent to severe asthma, all monosensitized to house dust mite | Moderate persistent to severe asthma, using daily medication, most patient at least on ICS | House dust mite, diagnosed by SPT or specific antibody test | Subcutaneous injections of extracts of <i>Dermatophagoides pteronyssinus</i> and <i>Dermatophagoides farina</i> (10000 AU/ml), initial dose 0,5AU/ml once a week. Dosage was increased weekly by 25-100% to reach optimal maintenance dose, with respect to local or systemic reaction. Maintenance therapy every 2 weeks during at least 3 months | No intervention | 6 months (last follow-up) | Primary: Medication score (5 point scale, modified GINA) Secondary: PEF, asthma symptom score, number of contacts with health care providers | Mean medication score declined after 6 months in both groups; no significant differences between group differences. Both groups had reduction of asthma symptoms after 6 months, but no between group differences. There was no difference in PEF. Patients in the intervention group had more clinical visits than the control group, but no difference in emergency room or hospitalization | Very few patients, no blinding, randomization procedure not clear |                                                                        |
| 9  |                                      |                                                     |                             |                                                                                                                                          |                                                                                            |                                                             |                                                                                                                                                                                                                                                                                                                                                    |                 |                           |                                                                                                                                              |                                                                                                                                                                                                                                                                                                                                                                                               |                                                                   |                                                                        |
| 10 |                                      |                                                     |                             |                                                                                                                                          |                                                                                            |                                                             |                                                                                                                                                                                                                                                                                                                                                    |                 |                           |                                                                                                                                              |                                                                                                                                                                                                                                                                                                                                                                                               |                                                                   |                                                                        |
| 11 |                                      |                                                     |                             |                                                                                                                                          |                                                                                            |                                                             |                                                                                                                                                                                                                                                                                                                                                    |                 |                           |                                                                                                                                              |                                                                                                                                                                                                                                                                                                                                                                                               |                                                                   |                                                                        |
| 12 |                                      |                                                     |                             |                                                                                                                                          |                                                                                            |                                                             |                                                                                                                                                                                                                                                                                                                                                    |                 |                           |                                                                                                                                              |                                                                                                                                                                                                                                                                                                                                                                                               |                                                                   |                                                                        |
| 13 |                                      |                                                     |                             |                                                                                                                                          |                                                                                            |                                                             |                                                                                                                                                                                                                                                                                                                                                    |                 |                           |                                                                                                                                              |                                                                                                                                                                                                                                                                                                                                                                                               |                                                                   |                                                                        |
| 14 |                                      |                                                     |                             |                                                                                                                                          |                                                                                            |                                                             |                                                                                                                                                                                                                                                                                                                                                    |                 |                           |                                                                                                                                              |                                                                                                                                                                                                                                                                                                                                                                                               |                                                                   |                                                                        |
| 15 |                                      |                                                     |                             |                                                                                                                                          |                                                                                            |                                                             |                                                                                                                                                                                                                                                                                                                                                    |                 |                           |                                                                                                                                              |                                                                                                                                                                                                                                                                                                                                                                                               |                                                                   |                                                                        |
| 16 |                                      |                                                     |                             |                                                                                                                                          |                                                                                            |                                                             |                                                                                                                                                                                                                                                                                                                                                    |                 |                           |                                                                                                                                              |                                                                                                                                                                                                                                                                                                                                                                                               |                                                                   |                                                                        |
| 17 |                                      |                                                     |                             |                                                                                                                                          |                                                                                            |                                                             |                                                                                                                                                                                                                                                                                                                                                    |                 |                           |                                                                                                                                              |                                                                                                                                                                                                                                                                                                                                                                                               |                                                                   |                                                                        |
| 18 |                                      |                                                     |                             |                                                                                                                                          |                                                                                            |                                                             |                                                                                                                                                                                                                                                                                                                                                    |                 |                           |                                                                                                                                              |                                                                                                                                                                                                                                                                                                                                                                                               |                                                                   |                                                                        |
| 19 |                                      |                                                     |                             |                                                                                                                                          |                                                                                            |                                                             |                                                                                                                                                                                                                                                                                                                                                    |                 |                           |                                                                                                                                              |                                                                                                                                                                                                                                                                                                                                                                                               |                                                                   |                                                                        |
| 20 |                                      |                                                     |                             |                                                                                                                                          |                                                                                            |                                                             |                                                                                                                                                                                                                                                                                                                                                    |                 |                           |                                                                                                                                              |                                                                                                                                                                                                                                                                                                                                                                                               |                                                                   |                                                                        |
| 21 |                                      |                                                     |                             |                                                                                                                                          |                                                                                            |                                                             |                                                                                                                                                                                                                                                                                                                                                    |                 |                           |                                                                                                                                              |                                                                                                                                                                                                                                                                                                                                                                                               |                                                                   |                                                                        |
| 22 |                                      |                                                     |                             |                                                                                                                                          |                                                                                            |                                                             |                                                                                                                                                                                                                                                                                                                                                    |                 |                           |                                                                                                                                              |                                                                                                                                                                                                                                                                                                                                                                                               |                                                                   |                                                                        |
| 23 |                                      |                                                     |                             |                                                                                                                                          |                                                                                            |                                                             |                                                                                                                                                                                                                                                                                                                                                    |                 |                           |                                                                                                                                              |                                                                                                                                                                                                                                                                                                                                                                                               |                                                                   |                                                                        |
| 24 |                                      |                                                     |                             |                                                                                                                                          |                                                                                            |                                                             |                                                                                                                                                                                                                                                                                                                                                    |                 |                           |                                                                                                                                              |                                                                                                                                                                                                                                                                                                                                                                                               |                                                                   |                                                                        |
| 25 |                                      |                                                     |                             |                                                                                                                                          |                                                                                            |                                                             |                                                                                                                                                                                                                                                                                                                                                    |                 |                           |                                                                                                                                              |                                                                                                                                                                                                                                                                                                                                                                                               |                                                                   |                                                                        |
| 26 |                                      |                                                     |                             |                                                                                                                                          |                                                                                            |                                                             |                                                                                                                                                                                                                                                                                                                                                    |                 |                           |                                                                                                                                              |                                                                                                                                                                                                                                                                                                                                                                                               |                                                                   |                                                                        |
| 27 |                                      |                                                     |                             |                                                                                                                                          |                                                                                            |                                                             |                                                                                                                                                                                                                                                                                                                                                    |                 |                           |                                                                                                                                              |                                                                                                                                                                                                                                                                                                                                                                                               |                                                                   |                                                                        |
| 28 |                                      |                                                     |                             |                                                                                                                                          |                                                                                            |                                                             |                                                                                                                                                                                                                                                                                                                                                    |                 |                           |                                                                                                                                              |                                                                                                                                                                                                                                                                                                                                                                                               |                                                                   |                                                                        |
| 29 |                                      |                                                     |                             |                                                                                                                                          |                                                                                            |                                                             |                                                                                                                                                                                                                                                                                                                                                    |                 |                           |                                                                                                                                              |                                                                                                                                                                                                                                                                                                                                                                                               |                                                                   |                                                                        |
| 30 |                                      |                                                     |                             |                                                                                                                                          |                                                                                            |                                                             |                                                                                                                                                                                                                                                                                                                                                    |                 |                           |                                                                                                                                              |                                                                                                                                                                                                                                                                                                                                                                                               |                                                                   |                                                                        |
| 31 |                                      |                                                     |                             |                                                                                                                                          |                                                                                            |                                                             |                                                                                                                                                                                                                                                                                                                                                    |                 |                           |                                                                                                                                              |                                                                                                                                                                                                                                                                                                                                                                                               |                                                                   |                                                                        |
| 32 |                                      |                                                     |                             |                                                                                                                                          |                                                                                            |                                                             |                                                                                                                                                                                                                                                                                                                                                    |                 |                           |                                                                                                                                              |                                                                                                                                                                                                                                                                                                                                                                                               |                                                                   |                                                                        |
| 33 |                                      |                                                     |                             |                                                                                                                                          |                                                                                            |                                                             |                                                                                                                                                                                                                                                                                                                                                    |                 |                           |                                                                                                                                              |                                                                                                                                                                                                                                                                                                                                                                                               |                                                                   |                                                                        |
| 34 |                                      |                                                     |                             |                                                                                                                                          |                                                                                            |                                                             |                                                                                                                                                                                                                                                                                                                                                    |                 |                           |                                                                                                                                              |                                                                                                                                                                                                                                                                                                                                                                                               |                                                                   |                                                                        |
| 35 |                                      |                                                     |                             |                                                                                                                                          |                                                                                            |                                                             |                                                                                                                                                                                                                                                                                                                                                    |                 |                           |                                                                                                                                              |                                                                                                                                                                                                                                                                                                                                                                                               |                                                                   |                                                                        |
| 36 |                                      |                                                     |                             |                                                                                                                                          |                                                                                            |                                                             |                                                                                                                                                                                                                                                                                                                                                    |                 |                           |                                                                                                                                              |                                                                                                                                                                                                                                                                                                                                                                                               |                                                                   |                                                                        |
| 37 |                                      |                                                     |                             |                                                                                                                                          |                                                                                            |                                                             |                                                                                                                                                                                                                                                                                                                                                    |                 |                           |                                                                                                                                              |                                                                                                                                                                                                                                                                                                                                                                                               |                                                                   |                                                                        |
| 38 | <b>Valovirta, 1984</b> <sup>52</sup> | RCT, double blind Caramel histamine placebo control | ?                           | 27 asthmatic children allergic to dog dander, aged 5 to 18 years                                                                         | Asthma severity not specified asthma medication not specified                              |                                                             | Subcutaneous immunotherapy with aluminium hydroxide bound dog                                                                                                                                                                                                                                                                                      | Placebo         |                           | Symptoms Allergen specific BHR                                                                                                               | The decrease in bronchial sensitivity was less marked than that in conjunctival sensitivity and                                                                                                                                                                                                                                                                                               | Study not useful No asthma medication scores                      | Primary outcome dog dander sensitivity, not asthma 2 authors connected |
| 39 |                                      |                                                     |                             |                                                                                                                                          |                                                                                            |                                                             |                                                                                                                                                                                                                                                                                                                                                    |                 |                           |                                                                                                                                              |                                                                                                                                                                                                                                                                                                                                                                                               |                                                                   |                                                                        |
| 40 |                                      |                                                     |                             |                                                                                                                                          |                                                                                            |                                                             |                                                                                                                                                                                                                                                                                                                                                    |                 |                           |                                                                                                                                              |                                                                                                                                                                                                                                                                                                                                                                                               |                                                                   |                                                                        |
| 41 |                                      |                                                     |                             |                                                                                                                                          |                                                                                            |                                                             |                                                                                                                                                                                                                                                                                                                                                    |                 |                           |                                                                                                                                              |                                                                                                                                                                                                                                                                                                                                                                                               |                                                                   |                                                                        |
| 42 |                                      |                                                     |                             |                                                                                                                                          |                                                                                            |                                                             |                                                                                                                                                                                                                                                                                                                                                    |                 |                           |                                                                                                                                              |                                                                                                                                                                                                                                                                                                                                                                                               |                                                                   |                                                                        |
| 43 |                                      |                                                     |                             |                                                                                                                                          |                                                                                            |                                                             |                                                                                                                                                                                                                                                                                                                                                    |                 |                           |                                                                                                                                              |                                                                                                                                                                                                                                                                                                                                                                                               |                                                                   |                                                                        |
| 44 |                                      |                                                     |                             |                                                                                                                                          |                                                                                            |                                                             |                                                                                                                                                                                                                                                                                                                                                    |                 |                           |                                                                                                                                              |                                                                                                                                                                                                                                                                                                                                                                                               |                                                                   |                                                                        |
| 45 |                                      |                                                     |                             |                                                                                                                                          |                                                                                            |                                                             |                                                                                                                                                                                                                                                                                                                                                    |                 |                           |                                                                                                                                              |                                                                                                                                                                                                                                                                                                                                                                                               |                                                                   |                                                                        |
| 46 |                                      |                                                     |                             |                                                                                                                                          |                                                                                            |                                                             |                                                                                                                                                                                                                                                                                                                                                    |                 |                           |                                                                                                                                              |                                                                                                                                                                                                                                                                                                                                                                                               |                                                                   |                                                                        |
| 47 |                                      |                                                     |                             |                                                                                                                                          |                                                                                            |                                                             |                                                                                                                                                                                                                                                                                                                                                    |                 |                           |                                                                                                                                              |                                                                                                                                                                                                                                                                                                                                                                                               |                                                                   |                                                                        |

|                                                                                                                                                    |                                   |                                            |                            |                                                                                                                                                     |                                       |                                                      |                                                                                                                                                                                                                                                                                        |                                                     |         |                                                                                                                                                                       |                                                                                                                                                                                    |                                                                                                                   |                                                           |
|----------------------------------------------------------------------------------------------------------------------------------------------------|-----------------------------------|--------------------------------------------|----------------------------|-----------------------------------------------------------------------------------------------------------------------------------------------------|---------------------------------------|------------------------------------------------------|----------------------------------------------------------------------------------------------------------------------------------------------------------------------------------------------------------------------------------------------------------------------------------------|-----------------------------------------------------|---------|-----------------------------------------------------------------------------------------------------------------------------------------------------------------------|------------------------------------------------------------------------------------------------------------------------------------------------------------------------------------|-------------------------------------------------------------------------------------------------------------------|-----------------------------------------------------------|
|                                                                                                                                                    |                                   |                                            |                            |                                                                                                                                                     |                                       | dander extract                                       |                                                                                                                                                                                                                                                                                        |                                                     |         | statistically not significant                                                                                                                                         |                                                                                                                                                                                    | to pharmaceutical company                                                                                         |                                                           |
| 1<br>2<br>3<br>4<br>5<br>6<br>7<br>8<br>9<br>10<br>11<br>12<br>13                                                                                  | <b>Warner, 1978</b> <sup>53</sup> | RCT, double blind Tyrosine placebo control | University, United Kingdom | 51 asthmatic children, aged 5 to 14 years, with positive <i>Dermatophagoides pteronyssinus</i> challenge                                            | ICS n=12, cromoglycate n=24 SABA n=14 | House dust mite, SPT and bronchoprovocation positive | Subcutaneous immunotherapy with tyrosine adsorbed <i>Dermatophagoides pteronyssinus</i> extracts                                                                                                                                                                                       | Placebo                                             | 1 year  | Symptoms Medication Lung function (PEF, FEV 0.75) Allergen specific BHR                                                                                               | Less asthma medication in active group, but no difference in control or immediate response on bronchoprovocation                                                                   | Useful; however incomparable low level of ICS                                                                     | Allocation concealment unclear No fixed medication scheme |
| 14<br>15<br>16<br>17<br>18<br>19<br>20<br>21<br>22<br>23<br>24<br>25<br>26<br>27<br>28<br>29<br>30<br>31<br>32<br>33<br>34<br>35<br>36<br>37<br>38 | <b>Zielen, 2010</b> <sup>55</sup> | RCT, single blind, no control intervention | Multinational, multicenter | 56 children with asthma GINA treatment II-III, on ICS, house dust mite (positive SPT), positive conjunctival provocation, significant RAST response | All on ICS, GINA II-III treatment     | House dust mite SPT, provocative                     | SCIT with allergens extracted from <i>Dermatophagoides pteronyssinus</i> in 2 strengths: A: 1000 TU/ml; B: 10000 TU/ml. Initial therapy: weekly increasing doses strength A, followed by B. After reaching max individually tolerated dose, dosage intervals were increased to 6 weeks | No immunotherapy, only maintenance therapy with ICS | 2 years | Primary: change in ICS dose steps to achieve asthma control Secondary: change in pre-bronchodilator y PEF, immunologic changes, nonspecific bronchial hyperreactivity | Less asthma medication in SCIT group as compared to control group, no change in asthma control, higher increase in PEF in intervention group. Adverse events in 97% in both groups | Block randomization. Multicenter, multinational is possible bicenter, binational. Conflict of interest in authors |                                                           |

Abbreviations: AU: dosing units; BHR: bronchohyperreactivity; FEV1: forced expiratory volume in 1 second; GINA: Global Initiative for Asthma; ICS: inhaled corticosteroids; ml: millilitres; n: number; PEF: peak expiratory flow; RAST: radioallergent sorbent test; RCT: randomized controlled trial; SABA: short-acting beta agonist; SCIT: subcutaneous immunotherapy; SD: standard deviation; SPT: skin prick test; TU: dosing units

\* Doctors diagnosed asthma? Stable/seasonal asthma? Mild/severe asthma?

† Asthma symptoms, allergy/rhinitis symptoms, asthma control, (disease specific) quality of life, exacerbations, lung function, adverse reactions and/or complications

‡ e.g. randomization procedure, blinding, risk of bias

1  
2  
3  
4  
5  
6  
7  
8  
9  
10  
11  
12  
13  
14  
15  
16  
17  
18  
19  
20  
21  
22  
23  
24  
25  
26  
27  
28  
29  
30  
31  
32  
33  
34  
35  
36  
37  
38  
39  
40  
41  
42  
43  
44  
45  
46  
47

Table E4. Evidence table selected RCT's in children included in systematic reviews Calamita et al., Penagos et al. and Pham-Thi et al. (SLIT)

| Author, date                         | Study design                                   | Setting                                  | Eligibility criteria                                                                                                                                   | Participants (number, gender, age, and   | Asthma type*, severity (e.g. on ICS?)                                                                   | Allergy type (mono/multi, allergens, proven)                     | Intervention (type, dose, duration)                                                                | Control                      | Follow-up (from start trial) | Outcomes                                                                                                               | Results†                                                                                                                         | Critical appraisal‡                                                                                                                                            | Comments                                                                                                           |
|--------------------------------------|------------------------------------------------|------------------------------------------|--------------------------------------------------------------------------------------------------------------------------------------------------------|------------------------------------------|---------------------------------------------------------------------------------------------------------|------------------------------------------------------------------|----------------------------------------------------------------------------------------------------|------------------------------|------------------------------|------------------------------------------------------------------------------------------------------------------------|----------------------------------------------------------------------------------------------------------------------------------|----------------------------------------------------------------------------------------------------------------------------------------------------------------|--------------------------------------------------------------------------------------------------------------------|
| <b>Bahceciler 2001</b> <sup>54</sup> | double-blind placebo-controlled SLIT drops HDM | Mono-center Turkey University hospital   | Asthma with need for ICS, HDM allergic, ongoing respiratory symptoms despite mite avoidance and appropriate ICS treatment, > 7 years, FEV <sub>1</sub> | 15, 8 male, 11,7 years                   | Moderate asthma, need for ICS, respectively symptoms despite mite avoidance, FEV <sub>1</sub> > 70%     | Mono-allergy HDM but negative for all other aeroallergens        | Drops SLIT, dose 100 IR/day, 4 weeks run-in, 4 weeks once daily, thereafter 2/week; total 6 months | Placebo drops                | 6 months                     | Symptom scores, compliance, SPT 6 months, Lung function, metacholine, serum IgE                                        | Improvement asthma score. Less use of SABA, trend towards less ICS (not significant), no change in PD20, no serious side effects | Randomization and blinding not clear, possible industrial influence, disclosures not stated, small number of patients, no follow-up after stop of intervention | Season not stated; decrease PEF in placebo group – stable in intervention group                                    |
| <b>Hirsch 1997</b> <sup>55</sup>     | double-blind placebo-controlled SLIT drops HDM | Mono-center, university hospital Germany | Not strictly specified                                                                                                                                 | 30, female n=10, 10,5 years (6-15 years) | 'mild to moderate asthma': n=8; allergic rhinitis: n=8; asthma and rhinitis: n=14 Not further specified | Allergy SPT positive HDM, part also sensitized cat, dog, grasses | Drops SLIT HDM, 3 weeks run-in, maintenance 7 drops 3 days/week; total 12 months                   | Placebo drops (vehicle only) | 12 months                    | Symptom scores, compliance, SPT 6 months, Lung function, metacholine, serum IgE, collection of dust samples (exposure) | Less pulmonary symptoms No difference use of SABA No change in PD20 No serious side effects                                      | Small number of patients, especially when specified per group. Enrollment of patients (possible selection bias) is not clear. Serious differences in patients  | Season not stated; Asthma group not well-described, exacerbations not described, 8 patients allergic rhinitis only |

| Author, date             | Study design                                                 | Setting            | Eligibility criteria                                                                                                                                                                                           | Participants (number, gender, age, and | Asthma type*, severity (e.g. on ICS?)                                                                    | Allergy type (mono/multi, allergens, proven)                    | Intervention (type, dose, duration)                                                                                         | Control                                                                           | Follow-up (from start trial) | Outcomes                                                                            | Results†                                                  | Critical appraisal‡                                                                                                                                                     | Comments                                                                               |
|--------------------------|--------------------------------------------------------------|--------------------|----------------------------------------------------------------------------------------------------------------------------------------------------------------------------------------------------------------|----------------------------------------|----------------------------------------------------------------------------------------------------------|-----------------------------------------------------------------|-----------------------------------------------------------------------------------------------------------------------------|-----------------------------------------------------------------------------------|------------------------------|-------------------------------------------------------------------------------------|-----------------------------------------------------------|-------------------------------------------------------------------------------------------------------------------------------------------------------------------------|----------------------------------------------------------------------------------------|
|                          |                                                              |                    |                                                                                                                                                                                                                |                                        |                                                                                                          |                                                                 |                                                                                                                             |                                                                                   |                              |                                                                                     |                                                           | groups, otherwise than intervention (type and duration of disease), no follow-up after intervention. 20% drop-out in intervention group, no intention-to-treat analysis |                                                                                        |
| Pajno 2003 <sup>57</sup> | double-blind placebo-controlled SLIT drops <i>Parietaria</i> | Mono-center, Italy | Inclusion: seasonal asthma and rhinoconjunctivitis, DDA, poor symptom control despite antihistamine, ICS and nedocromil use during pollen season, positive skin prick test <i>Parietaria</i> , Specific IgE to | 38, 20 female, 11 years,               | DDA, seasonal asthma, poor control despite medication, including ICS, patients with PD20<2.0 mg excluded | Mono sensitization to <i>Parietaria</i> , SPT and RAST positive | Drops SLIT <i>Parietaria</i> , 4 weeks run-in, maintenance every other day, total 12 months, co-medication with fluticasone | Placebo drops + fluticasone 2 <sup>nd</sup> control group: no protocol medication | 12 months                    | Symptom scores, VAS score during pollen season, compliance, SPT 6 months, serum IgE | No difference in symptom scores. Better VAS in SLIT group | Patient selection not clear: 30/38 children were randomized; 8 were control (not willing to participate in trial?), possible selection bias                             | Unclear whether fluticasone was given intranasally or orally. No lung function or PD20 |

1  
2  
3  
4  
5  
6  
7  
8  
9  
10  
11  
12  
13  
14  
15  
16  
17  
18  
19  
20  
21  
22  
23  
24  
25  
26  
27  
28  
29  
30  
31  
32  
33  
34  
35  
36  
37  
38  
39  
40  
41  
42  
43  
44  
45  
46  
47



| Author, date                                  | Study design                                                 | Setting                                   | Eligibility criteria                                                                                                                              | Participants (number, gender, age, and Asthma type*, severity (e.g. on ICS?) | Allergy type (mono/multi, allergens, proven) | Intervention (type, dose, duration)                             | Control                                                                                                                                                                 | Follow-up (from start trial) | Outcomes  | Result†                                                                                               | Critical appraisal‡                                                                                     | Comments                                                     |                                                                                                           |
|-----------------------------------------------|--------------------------------------------------------------|-------------------------------------------|---------------------------------------------------------------------------------------------------------------------------------------------------|------------------------------------------------------------------------------|----------------------------------------------|-----------------------------------------------------------------|-------------------------------------------------------------------------------------------------------------------------------------------------------------------------|------------------------------|-----------|-------------------------------------------------------------------------------------------------------|---------------------------------------------------------------------------------------------------------|--------------------------------------------------------------|-----------------------------------------------------------------------------------------------------------|
|                                               |                                                              |                                           | <i>Parietaria</i> .<br>Exclusion: sensitization to other allergens, previous immunotherapy, severe asthma (FEV <sub>1</sub> <70%), other diseases |                                                                              |                                              |                                                                 |                                                                                                                                                                         |                              |           |                                                                                                       |                                                                                                         |                                                              |                                                                                                           |
| <b>Pajno 2004</b> <sup># 58</sup>             | double-blind placebo-controlled SLIT drops <i>Parietaria</i> | Mono-center, Italy                        | seasonal asthma during spring and allergic rhinitis                                                                                               | 30 (8-14 years)                                                              | DDA                                          | Mono sensitization to <i>Parietaria</i> , SPT and RAST positive | Drops SLIT <i>Parietaria</i> , 4 weeks run-in, maintenance every other day, total 12 months                                                                             | Placebo drops                | 24 months | Lung function and PD20                                                                                | No change in lung function, improvement in BHR (PD20) after 2 years                                     | 1 author affiliated to pharmaceutical industry               |                                                                                                           |
| <b>Rolnick-Werninghaus 2004</b> <sup>60</sup> | double-blind placebo-controlled SLIT drops grass-pollen      | Multi-center, university clinics, Germany | Allergic rhinitis with or without seasonal asthma<br>Exclusion criteria: perennial asthma, ICS use                                                | Total 97 (32 female), 3-14 years<br>Asthma: n=39                             | DDA, seasonal asthma, no ICS use             | Grasspollen IgE and SPT positive<br>Others not mentioned        | Drops SLIT 5-grass mixture, 4 week run-in, 3 doses/week, total 32 months<br>1000 STU were equivalent to 25 BU and contained 2.5 µg of major grass pollen allergens. The | Placebo drops                | 32 months | Primary end-point: multiple symptom-medication score, lung function, FeNO (part of the participants), | Less use of combined medication (asthma medication not analyzed separately). Lung function inconclusive | 2 <sup>nd</sup> author affiliated to pharmaceutical industry | "this is not my patient" (perennial asthma excluded); lung function only analyzed as absolute values (not |

| Author, date                | Study design                                   | Setting             | Eligibility criteria                                                                                                                                      | Participants (number, gender, age, and Asthma type*, severity (e.g. on ICS?) | Allergy type (mono/multi, allergens, proven) | Intervention (type, dose, duration)                                                                                                                                                                                          | Control       | Follow-up (from start trial) | Outcomes                                                                     | Results†                                                                                             | Critical appraisal‡                                                                                                    | Comments     |
|-----------------------------|------------------------------------------------|---------------------|-----------------------------------------------------------------------------------------------------------------------------------------------------------|------------------------------------------------------------------------------|----------------------------------------------|------------------------------------------------------------------------------------------------------------------------------------------------------------------------------------------------------------------------------|---------------|------------------------------|------------------------------------------------------------------------------|------------------------------------------------------------------------------------------------------|------------------------------------------------------------------------------------------------------------------------|--------------|
|                             |                                                |                     |                                                                                                                                                           |                                                                              |                                              | monthly dose during maintenance treatment was 6 µg (0.5 µg/dose, 3 times/week). The median for the total duration of treatment was 32 months (January 1999 to November 2001) with a median cumulated dose of 188 µg allergen |               |                              | complications                                                                | ve; No change in FeNO<br>1 patient asthma exacerbation related to SLIT                               |                                                                                                                        | % predicted) |
| Ippoliti 2003 <sup>63</sup> | double-blind placebo-controlled SLIT drops HDM | Monocenter, Italy   | Mild/moderate asthma with or without rhinoconjunctivitis, FEV <sub>1</sub> > 70% predicted, mono-allergy HDM<br>Exclusion: other allergies, severe asthma | 86 (5-12 years); 35 female                                                   | Mild/moderate asthma, no seasonal asthma     | Mono HDM Drops SLIT <i>Dermatophagoides pteronyssinus</i> 1 + 2, 3 doses/week, 6 months                                                                                                                                      | Placebo drops | 6 months                     | Symptoms (unexplained scale), FEV <sub>1</sub> , serum parameters, tolerance | Symptom scale not explained FEV <sub>1</sub> ; SLIT: 83,4% → 92,6%; placebo: 80,7% → 81,2% (no test) | Poor description of methods (randomization, blinding, drop-out, outcome assessment, and results), selected population? |              |
| Niu 2006 <sup>64</sup>      | double-blind placebo                           | Multicenter, Taiwan | 6-12 years, mild/moderate asthma, mono-                                                                                                                   | 110; 97 in follow-                                                           | Mild/moderate asthma                         | Mono HDM Drops SLIT <i>Dermatophagoides</i>                                                                                                                                                                                  | Placebo drops | 30 weeks                     | Symptom scores, medication                                                   | Symptoms FEV <sub>1</sub> : no numeric                                                               | Poor description of                                                                                                    |              |



| Author, date                    | Study design                                     | Setting            | Eligibility criteria                                                                                                                           | Participants (number, gender, age, and Asthma type*, severity (e.g. on ICS?) | Allergy type (mono/multi, allergens, proven)            | Intervention (type, dose, duration)                                                                                                                | Control         | Follow-up (from start trial) | Outcomes                                                                                                          | Result†                                                                                                                     | Critical appraisal‡                                                         | Comments |
|---------------------------------|--------------------------------------------------|--------------------|------------------------------------------------------------------------------------------------------------------------------------------------|------------------------------------------------------------------------------|---------------------------------------------------------|----------------------------------------------------------------------------------------------------------------------------------------------------|-----------------|------------------------------|-------------------------------------------------------------------------------------------------------------------|-----------------------------------------------------------------------------------------------------------------------------|-----------------------------------------------------------------------------|----------|
|                                 | - controlled SLIT drops HDM                      |                    | allergy HDM, FEV <sub>1</sub> > 70%.<br>Exclusion: other allergies, severe asthma                                                              | up (39 female)                                                               |                                                         | <i>pteronysinus</i> + <i>Dermatophagoides farinae</i> , 4 weeks pretreatment, 3 weeks inductions, 21 weeks treatment, 2 weeks evaluation follow-up |                 |                              | scores, lung function, skin prick test, serum IgE, global assessment, safety                                      | data described                                                                                                              | randomization and blinding procedure, poor outcome reports                  |          |
| <b>Pajno 2000</b> <sup>65</sup> | double-blind placebo-controlled SLIT drops HDM   | Monocenter Italy   | Mild/moderate asthma, mono-allergy HDM<br>Exclusion: other allergies, severe asthma                                                            | 24 (8-15 years); 11 female                                                   | Mild/moderate asthma                                    | Mono HDM<br>Drops SLIT <i>Dermatophagoides pteronyssinus</i> 1 + 2, maintenance 3 doses/week, 3 years                                              | Placebo         | 3 years                      | Symptoms, medication use, asthma episodes, laboratory tests, side effects                                         | Only nighttime symptoms reported                                                                                            | Few children, methodological failure on drop-outs, selective outcome report |          |
| <b>Pham-Thi</b> <sup>44</sup>   | Double-blind placebo-controlled SLIT tablets HDM | Monocenter, France | Asthma, treated with inhaled corticosteroids, reversible bronchial obstruction, sensitized to HDM<br>Exclusion: sensitization to perennial and | 109 (5-16 years); 31 female                                                  | Mild asthma: 73<br>Moderate asthma: 36<br>All using ICS | Mono HDM<br>Tablets <i>Dermatophagoides pteronyssinus</i> + <i>Dermatophagoides farinae</i> , 2 weeks up dosing, then maintenance 17,5 months      | Placebo tablets | 18 months                    | Asthma symptom score, asthma-free days, asthma medication score, lung function, quality of life, rhinitis scores, | No significant differences between SLIT and placebo in symptoms and FEV <sub>1</sub> .<br>Quality of life: in children 6-11 | Poor description of blinding                                                |          |

| Author, date | Study design | Setting | Eligibility criteria                       | Participants (number, gender, age, and Asthma type*, severity (e.g. on ICS?) | Allergy type (mono/multi, allergens, proven) | Intervention (type, dose, duration) | Control | Follow-up (from start trial) | Outcomes                     | Result†                                                                                                                                                         | Critical appraisal‡ | Comments |
|--------------|--------------|---------|--------------------------------------------|------------------------------------------------------------------------------|----------------------------------------------|-------------------------------------|---------|------------------------------|------------------------------|-----------------------------------------------------------------------------------------------------------------------------------------------------------------|---------------------|----------|
|              |              |         | seasonal allergens, previous immunotherapy |                                                                              |                                              |                                     |         |                              | skin-prick tests, antibodies | significant difference on severity domain, clinical relevance not stated. Other domains, and older children: no significant difference between SLIT and placebo |                     |          |

Abbreviations: µg: micrograms; BHR: bronchial hyperreactivity; BU: biological units; DDA: doctor diagnosed asthma; FeNO: fraction nitric oxide in exhaled air; FEV<sub>1</sub>: forced expiratory volume in 1 second; HDM: house dust mite; ICS: inhaled corticosteroids; IR: index units of reactivity; n: number; PD20: concentration (metacholin/histamine) that causes a 20% fall in FEV<sub>1</sub>; PEF: peak expiratory flow; RAST: radioallergent sorbent test; RCT: randomized controlled trial; SABA: short-acting beta agonists; SLIT: sublingual immunotherapy; SPT: skin prick test; STU: specific treatment units; VAS: visual analogue scale

\* Doctors diagnosed asthma? Stable/seasonal asthma? Mild/severe asthma?

† Asthma symptoms, allergy/rhinitis symptoms, asthma control, (disease specific) quality of life, exacerbations, lung function, adverse reactions and/or complications

‡ e.g. randomization procedure, blinding, risk of bias

\*\* defined as an abrupt and/or progressive worsening of symptoms of shortness of breath, chest tightness, or some combination of these symptoms, which did not respond to regular use of beta-2-agonists for a duration of 24 hours

# is long term follow-up of Pajno 2003

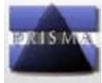

# PRISMA 2009 Checklist

1  
2  
3  
4  
5  
6  
7  
8  
9  
10  
11  
12  
13  
14  
15  
16  
17  
18  
19  
20  
21  
22  
23  
24  
25  
26  
27  
28  
29  
30  
31  
32  
33  
34  
35  
36  
37  
38  
39  
40  
41  
42  
43  
44  
45  
46  
47  
48  
49

| Section/topic                      | #  | Checklist item                                                                                                                                                                                                                                                                                              | Reported on page # |
|------------------------------------|----|-------------------------------------------------------------------------------------------------------------------------------------------------------------------------------------------------------------------------------------------------------------------------------------------------------------|--------------------|
| <b>TITLE</b>                       |    |                                                                                                                                                                                                                                                                                                             |                    |
| Title                              | 1  | Identify the report as a systematic review, meta-analysis, or both.                                                                                                                                                                                                                                         | 1                  |
| <b>ABSTRACT</b>                    |    |                                                                                                                                                                                                                                                                                                             |                    |
| Structured summary                 | 2  | Provide a structured summary including, as applicable: background; objectives; data sources; study eligibility criteria, participants, and interventions; study appraisal and synthesis methods; results; limitations; conclusions and implications of key findings; systematic review registration number. | 5                  |
| <b>INTRODUCTION</b>                |    |                                                                                                                                                                                                                                                                                                             |                    |
| Rationale                          | 3  | Describe the rationale for the review in the context of what is already known.                                                                                                                                                                                                                              | 8                  |
| Objectives                         | 4  | Provide an explicit statement of questions being addressed with reference to participants, interventions, comparisons, outcomes, and study design (PICOS).                                                                                                                                                  | 8                  |
| <b>METHODS</b>                     |    |                                                                                                                                                                                                                                                                                                             |                    |
| Protocol and registration          | 5  | Indicate if a review protocol exists, if and where it can be accessed (e.g., Web address), and, if available, provide registration information including registration number.                                                                                                                               | n.a.               |
| Eligibility criteria               | 6  | Specify study characteristics (e.g., PICOS, length of follow-up) and report characteristics (e.g., years considered, language, publication status) used as criteria for eligibility, giving rationale.                                                                                                      | 9                  |
| Information sources                | 7  | Describe all information sources (e.g., databases with dates of coverage, contact with study authors to identify additional studies) in the search and date last searched.                                                                                                                                  | 19                 |
| Search                             | 8  | Present full electronic search strategy for at least one database, including any limits used, such that it could be repeated.                                                                                                                                                                               | Table E1           |
| Study selection                    | 9  | State the process for selecting studies (i.e., screening, eligibility, included in systematic review, and, if applicable, included in the meta-analysis).                                                                                                                                                   | 10; table E2       |
| Data collection process            | 10 | Describe method of data extraction from reports (e.g., piloted forms, independently, in duplicate) and any processes for obtaining and confirming data from investigators.                                                                                                                                  | 10 (fig 1)         |
| Data items                         | 11 | List and define all variables for which data were sought (e.g., PICOS, funding sources) and any assumptions and simplifications made.                                                                                                                                                                       | 10                 |
| Risk of bias in individual studies | 12 | Describe methods used for assessing risk of bias of individual studies (including specification of whether this was done at the study or outcome level), and how this information is to be used in any data synthesis.                                                                                      | 10                 |
| Summary measures                   | 13 | State the principal summary measures (e.g., risk ratio, difference in means).                                                                                                                                                                                                                               | Table 1            |
| Synthesis of results               | 14 | Describe the methods of handling data and combining results of studies, if done, including measures of consistency (e.g., $I^2$ For each meta-analysis. <a href="http://bmjopen.bmj.com/site/about/guidelines.xhtml">http://bmjopen.bmj.com/site/about/guidelines.xhtml</a> )                               | 10                 |

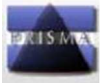

# PRISMA 2009 Checklist

Page 1 of 2

| Section/topic                 | #  | Checklist item                                                                                                                                                                                           | Reported on page #          |
|-------------------------------|----|----------------------------------------------------------------------------------------------------------------------------------------------------------------------------------------------------------|-----------------------------|
| Risk of bias across studies   | 15 | Specify any assessment of risk of bias that may affect the cumulative evidence (e.g., publication bias, selective reporting within studies).                                                             | 10                          |
| Additional analyses           | 16 | Describe methods of additional analyses (e.g., sensitivity or subgroup analyses, meta-regression), if done, indicating which were pre-specified.                                                         | 10                          |
| <b>RESULTS</b>                |    |                                                                                                                                                                                                          |                             |
| Study selection               | 17 | Give numbers of studies screened, assessed for eligibility, and included in the review, with reasons for exclusions at each stage, ideally with a flow diagram.                                          | 12 + fig 1                  |
| Study characteristics         | 18 | For each study, present characteristics for which data were extracted (e.g., study size, PICOS, follow-up period) and provide the citations.                                                             | Table E2, E3, E4            |
| Risk of bias within studies   | 19 | Present data on risk of bias of each study and, if available, any outcome level assessment (see item 12).                                                                                                | Table 2, , table E2, E3, E4 |
| Results of individual studies | 20 | For all outcomes considered (benefits or harms), present, for each study: (a) simple summary data for each intervention group (b) effect estimates and confidence intervals, ideally with a forest plot. | Fig 2, 3; Table E2, E3, E4  |
| Synthesis of results          | 21 | Present results of each meta-analysis done, including confidence intervals and measures of consistency.                                                                                                  | 12 -15; Fig 2, 3            |
| Risk of bias across studies   | 22 | Present results of any assessment of risk of bias across studies (see Item 15).                                                                                                                          | Table 3                     |
| Additional analysis           | 23 | Give results of additional analyses, if done (e.g., sensitivity or subgroup analyses, meta-regression [see Item 16]).                                                                                    | n.a.                        |
| <b>DISCUSSION</b>             |    |                                                                                                                                                                                                          |                             |
| Summary of evidence           | 24 | Summarize the main findings including the strength of evidence for each main outcome; consider their relevance to key groups (e.g., healthcare providers, users, and policy makers).                     | 16                          |
| Limitations                   | 25 | Discuss limitations at study and outcome level (e.g., risk of bias), and at review-level (e.g., incomplete retrieval of identified research, reporting bias).                                            | 16-17                       |
| Conclusions                   | 26 | Provide a general interpretation of the results in the context of other evidence, and implications for future research.                                                                                  | 17                          |
| <b>FUNDING</b>                |    |                                                                                                                                                                                                          |                             |
| Funding                       | 27 | Describe sources of funding for the systematic review and other support (e.g., supply of data); role of funders for the systematic review.                                                               | 3                           |

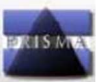

# PRISMA 2009 Checklist

1  
2  
3  
4  
5  
6  
7  
8  
9  
10  
11  
12  
13  
14  
15  
16  
17  
18  
19  
20  
21  
22  
23  
24  
25  
26  
27  
28  
29  
30  
31  
32  
33  
34  
35  
36  
37  
38  
39  
40  
41  
42  
43  
44  
45  
46  
47  
48  
49

doi:10.1371/journal.pmed1000097

For more information, visit: [www.prisma-statement.org](http://www.prisma-statement.org).

Page 2 of 2

For peer review only

# BMJ Open

**Applicability of evidence from previous systematic reviews on immunotherapy in current practice of childhood asthma treatment: A GRADE (Grading of Recommendations Assessment, Development and Evaluation) systematic review**

|                                 |                                                                                                                                                                                                                                                                                               |
|---------------------------------|-----------------------------------------------------------------------------------------------------------------------------------------------------------------------------------------------------------------------------------------------------------------------------------------------|
| Journal:                        | <i>BMJ Open</i>                                                                                                                                                                                                                                                                               |
| Manuscript ID                   | bmjopen-2017-016326.R2                                                                                                                                                                                                                                                                        |
| Article Type:                   | Research                                                                                                                                                                                                                                                                                      |
| Date Submitted by the Author:   | 20-Sep-2017                                                                                                                                                                                                                                                                                   |
| Complete List of Authors:       | van de Griendt, Erik-Jonas; De Kinderkliniek, Paediatrics; AMC, Paediatric Pulmonology<br>Tuut, Mariska; PROVA, guideline development and research<br>de Groot, Hans; Stichting Reinier Haga Groep, Paediatric Allergology<br>Brand, Paul; Isala klinieken, Princess Amalia Children's Clinic |
| <b>Primary Subject Heading</b>: | Evidence based practice                                                                                                                                                                                                                                                                       |
| Secondary Subject Heading:      | Respiratory medicine, Paediatrics, Immunology (including allergy)                                                                                                                                                                                                                             |
| Keywords:                       | Allergy < THORACIC MEDICINE, Asthma < THORACIC MEDICINE, Paediatric thoracic medicine < PAEDIATRICS, GRADE systematic review, Children, Immunotherapy                                                                                                                                         |
|                                 |                                                                                                                                                                                                                                                                                               |

SCHOLARONE™  
Manuscripts

only

1  
2  
3 1 **Applicability of evidence from previous systematic reviews on immunotherapy in**  
4 **current practice of childhood asthma treatment: A GRADE (Grading of**  
5 **Recommendations Assessment, Development and Evaluation) systematic review**  
6  
7

8 **Authors**  
9

- 10 1. Erik-Jonas **van de Griendt**\* MD, paediatric pulmonologist,  
11 DeKinderkliniek Almere and Academic Medical Centre Amsterdam,  
12 Hospitaaldreef 29, 1315 RC Almere, The Netherlands  
13 e.j.vandegriendt@amc.uva.nl *and*  
14  
15  
16  
17  
18 Mariska K **Tuut**\*, MSc, epidemiologist,  
19 PROVA, Spoorstraat 31, 7051 CG Varsseveld, The Netherlands,  
20 m.tuut@provaweb.nl  
21  
22  
23 2. Hans de Groot MD, PhD, allergologist,  
24 Department of Paediatric Allergology, Reinier de Graaf Group, Reinier de Graafweg  
25 5, 2625 AD Delft, The Netherlands, h.degroot@rdgg.nl  
26  
27  
28  
29  
30 3. Paul L.P. Brand MD, PhD, paediatrician, Princess Amalia Children's Center, Isala  
31 Hospital, P.O. Box 10400, 8000 GK Zwolle, the Netherlands; UMCG Postgraduate  
32 School of Medicine, University Medical Center and University of Groningen, The  
33 Netherlands, p.l.p.brand@isala.nl  
34  
35  
36

37 *\*both authors contributed equally*  
38  
39  
40  
41

42 **Word count:** 3267 words (excluding title page, abstract, refs, figs, tables)  
43  
44  
45

46 **Correspondence:**  
47

48 Erik-Jonas van de Griendt, dept of paediatrics, DeKinderkliniek  
49 Hospitaaldreef 29  
50 1315 RC Almere  
51 The Netherlands  
52 telephone: +31 36 7630030  
53 e-mail: [e.j.vandegriendt@amc.uva.nl](mailto:e.j.vandegriendt@amc.uva.nl)  
54  
55  
56  
57  
58  
59  
60

1  
2  
3 32 **Copyright/license for publication**  
4

5 33 The Corresponding Author has the right to grant on behalf of all authors and does grant on  
6 34 behalf of all authors, a worldwide licence to the Publishers and its licensees in perpetuity, in  
7 35 all forms, formats and media (whether known now or created in the future), to i) publish,  
8 36 reproduce, distribute, display and store the Contribution, ii) translate the Contribution into  
9 37 other languages, create adaptations, reprints, include within collections and create  
10 38 summaries, extracts and/or, abstracts of the Contribution, iii) create any other derivative  
11 39 work(s) based on the Contribution, iv) to exploit all subsidiary rights in the Contribution, v) the  
12 40 inclusion of electronic links from the Contribution to third party material where-ever it may be  
13 41 located; and, vi) licence any third party to do any or all of the above.  
14  
15  
16  
17  
18  
19  
20  
21

22 43 **Conflict of interest**  
23

24 44 All authors have completed the ICMJE uniform disclosure form at  
25 45 [http://www.icmje.org/coi\\_disclosure.pdf](http://www.icmje.org/coi_disclosure.pdf) and declare: no support from any organisation for the  
26 46 submitted work, no financial relationships with any organisations that might have an interest  
27 47 in the submitted work in the previous three years, no other relationships or activities that  
28 48 could appear to have influenced the submitted work.  
29  
30  
31  
32

33 49  
34  
35 50 **Funding**  
36

37 51 This work was performed as part of the revision of the Dutch Guideline on Paediatric  
38 52 Asthma. This guideline development was financially supported by the Dutch College of  
39 53 Paediatricians NVK and a grant of the Dutch Federation of Medical Specialists SKMS.  
40  
41  
42  
43

44 55 **Contributorship statement**  
45

46 56 EJJ designed the study, chaired the guideline working group, provided clinical input (e.g.  
47 57 defined clinical relevant outcome measures, judged the literature review from a clinical point  
48 58 of view), wrote and revised the manuscript, and approved the final version.  
49  
50  
51

52 59 MKT designed the study, was methodologist of the guideline working group, provided  
53 60 methodological input (e.g. provided literature search, selection, critical appraisal, GRADE  
54 61 evidence profiles), wrote and revised the manuscript, and approved the final version.  
55  
56  
57  
58  
59  
60



1  
2  
3 62 HdG was member of the guideline working group, designed the study, revised the  
4 63 manuscript and approved the final version.

5  
6  
7 64 PB provided clinical input, revised the manuscript and approved the final version.

8  
9 65 All authors meet full criteria for authorship, i.e. all contributed substantially, revised, approved  
10 66 the final version of the manuscript and agreed to be accountable for all aspects of the work.

11  
12 67

13  
14  
15 68 **Data sharing statement**

16  
17 69 Extra data can be accessed in the online repository. Apart from this, no additional data are  
18 70 available.

19  
20  
21 71

22  
23 72 **Transparency declaration**

24  
25  
26 73 The corresponding author affirms that this manuscript is an honest, accurate, and  
27 74 transparent account of the study being reported; that no important aspects of the study have  
28 75 been omitted; and that any discrepancies from the study as planned (and, if relevant,  
29 76 registered) have been explained.  
30  
31  
32  
33  
34  
35  
36  
37  
38  
39  
40  
41  
42  
43  
44  
45  
46  
47  
48  
49  
50  
51  
52  
53  
54  
55  
56  
57  
58  
59  
60

1  
2  
3  
4  
5  
6  
7  
8  
9  
10  
11  
12  
13  
14  
15  
16  
17  
18  
19  
20  
21  
22  
23  
24  
25  
26  
27  
28  
29  
30  
31  
32  
33  
34  
35  
36  
37  
38  
39  
40  
41  
42  
43  
44  
45  
46  
47  
48  
49  
50  
51  
52  
53  
54  
55  
56  
57  
58  
59  
60

77 **Abbreviations**

- 78 • 95%CI: 95% confidence interval
- 79 • AMSTAR: A Measurement Tool to Assess Systematic Reviews
- 80 • FEV<sub>1</sub>: forced expiratory volume in 1 second
- 81 • GRADE: Grading of Recommendations, Assessment, Development and Evaluation
- 82 • ICS: inhaled corticosteroids
- 83 • RCT: randomized controlled trial
- 84 • SCIT: subcutaneous immunotherapy
- 85 • SR: systematic review
- 86 • SLIT: sublingual immunotherapy

87

88 **Key words:** allergy, asthma, children, adolescents, immunotherapy, efficacy, GRADE,  
89 systematic review

90

1  
2  
3 91 **Abstract**  
4

5 92 **Objective.** Because most children with asthma now use inhaled corticosteroids (ICS), the  
6 added benefit of immunotherapy in asthmatic children needs to be examined. We re-  
7 93 assessed the effectiveness of subcutaneous (SCIT) and sublingual immunotherapy (SLIT) in  
8 94 childhood asthma treatment focusing on studies with patient relevant outcome measures and  
9 95 children using ICS.  
10 96

11 97 **Methods.** We used the GRADE approach to systematically search and appraise the  
12 98 evidence using predefined critical patient relevant outcomes (asthma symptoms, asthma  
13 99 control and exacerbations). We searched to retrieve systematic reviews and randomized  
14 100 controlled trials on immunotherapy for asthma in children (1960 - 2017). We assessed the  
15 101 quality of the body of evidence with GRADE criteria.  
16  
17

18 102 **Results.** The quality of the evidence for SCIT was very low due to a large risk of bias and  
19 103 indirectness (dated studies in children not using ICS). No effect of SCIT was found for  
20 104 asthma symptoms; no studies reported on asthma control. For asthma exacerbations,  
21 105 studies favoured SCIT. We have little confidence in this effect estimate, due to the very low  
22 106 quality of evidence. For SLIT, quality of the evidence was very low due to a large risk of bias,  
23 107 indirectness and imprecision. The outcome "asthma symptoms" could not be calculated due  
24 108 to lack of standardization and large clinical heterogeneity. Other predefined outcomes were  
25 109 not reported.  
26  
27

28 110 **Conclusion.** The beneficial effects of immunotherapy in childhood asthma found in earlier  
29 111 reviews are no longer considered applicable, because of indirectness (studies performed in  
30 112 children not being treated according to current asthma guidelines with inhaled  
31 113 corticosteroids). There was absence of evidence to properly determine the effectiveness or  
32 114 lack thereof of immunotherapy in asthma treatment in children with inhaled corticosteroids.  
33  
34  
35  
36  
37  
38  
39  
40  
41  
42  
43  
44  
45  
46  
47  
48  
49  
50  
51  
52  
53  
54  
55  
56  
57  
58  
59  
60

1  
2  
3 115 **Strengths and limitations of this study**  
4

- 5 116 • This study is the first review evaluating immunotherapy in asthmatic children using  
6 117 the GRADE approach, focusing more on clinically relevant than on statistically  
7 118 significant differences in patient relevant outcomes.  
8  
9  
10 119 • By using GRADE we identified indirectness in previous systematic reviews in this  
11 120 field, which highlight a lack of applicable evidence  
12  
13  
14 121 • A strength of the study is the use of predefined clinically relevant patient outcomes,  
15 122 rather than statistically significant differences.  
16  
17  
18 123 • A general limitation of a systematic review is the use of aggregated data, that, in  
19 124 theory might mask potential specific results.  
20  
21  
22 125 • This study has focused on critically appraising earlier evidence for nowadays practice,  
23 126 rather than endeavoring to be complete.  
24  
25  
26  
27  
28  
29  
30  
31  
32  
33  
34  
35  
36  
37  
38  
39  
40  
41  
42  
43  
44  
45  
46  
47  
48  
49  
50  
51  
52  
53  
54  
55  
56  
57  
58  
59  
60

## 127 Introduction

128 Asthma affects 10-15% of school-aged children. For children with persistent asthma, all  
129 international guidelines recommend daily controller treatment with inhaled corticosteroids  
130 (ICS), and reliever medication (short-acting  $\beta$ -2-agonists) as needed.<sup>1,2</sup> Although many  
131 children achieve complete asthma control using this effective and safe treatment,<sup>1</sup> some  
132 need additional treatment to obtain disease control.<sup>3,4</sup> Identification and treatment of  
133 comorbidities in children with problematic severe asthma is part of the stepwise approach to  
134 improve asthma control in these children.<sup>5,6</sup>

135 The most common of these comorbidities in children with asthma is allergic rhinitis,<sup>5</sup>  
136 symptoms of which occur in 60-80% of asthmatic children.<sup>7,8</sup> Allergic rhinitis shares a  
137 common pathophysiological pathway with asthma, which has been described as the united  
138 airway concept.<sup>9</sup> Allergic rhinitis is associated with worse asthma control in children, and  
139 accumulating evidence suggests that treatment of allergic rhinitis with intranasal steroids  
140 improves not only rhinitis, but also asthma symptoms in these patients.<sup>7,10,11</sup>

141 When symptoms of allergic rhinitis cannot be sufficiently controlled with nasal corticosteroids  
142 and oral antihistamines,<sup>9,12</sup> immunotherapy can be considered as additional treatment.<sup>13</sup>  
143 Subcutaneous immunotherapy (SCIT) requires repeated injections with an allergen extract  
144 and is available for allergens such as grass and tree pollen and house dust mite. After  
145 disappointing results of low-dose preparations in drops, effective high-dose sublingual  
146 immunotherapy (SLIT) has now become available with grass pollen allergen extract in a daily  
147 sublingual tablet.<sup>14,15</sup> A Cochrane systematic review, first published in 2000, and last updated  
148 in 2010, reported beneficial effects of immunotherapy in children with asthma.<sup>16</sup> Multiple  
149 studies in this latter review, however, were performed before or in the 1980s, when most  
150 children with asthma were not using ICS.

151 As part of the update of the Dutch pediatric guideline on childhood asthma, we evaluated the  
152 literature on the added value of SCIT and SLIT in childhood asthma.<sup>17</sup> Our structured clinical  
153 question was to assess whether immunotherapy (subcutaneous or sublingual), as an add-on  
154 to usual care with daily ICS, improves asthma outcomes in children (6-12 years) and  
155 adolescents (>12 years) with persistent asthma and sensitization to relevant aeroallergens  
156 (grass or tree pollen, house dust mite, or combinations), with or without symptoms of allergic  
157 rhinitis.

158

1  
2  
3 159 **Methods**  
4

5 160 We used the GRADE approach (Grading of Recommendations Assessment, Development  
6 and Evaluation) to appraise and summarize the body of evidence. GRADE is an  
7 161 internationally approved standard for managing complex evidence reviews.<sup>18</sup> In contrast to  
8 162 former grading systems, GRADE focuses on the quality of the total body of evidence, instead  
9 163 of judging single studies. Another important characteristic of GRADE is that predefined  
10 164 outcomes with thresholds for clinical relevance are being used.<sup>19</sup> In earlier grading systems,  
11 165 the evidence was summarized using outcomes reported in studies, not necessarily being  
12 166 outcomes a guideline development group would be interested in.<sup>20</sup> GRADE avoids the use of  
13 167 surrogate or intermediate outcomes, and uses outcomes and differences that are more  
14 168 clinically relevant to patients instead. Starting from a systematic review, for each outcome the  
15 169 quality of evidence can be downgraded or upgraded, for instance based on risk of bias,  
16 170 inconsistency, indirectness, possible publication bias, and dose-response relation.  
17 171

18 172 The guideline development group included an epidemiologist, paediatric respiratory  
19 173 physicians, paediatricians, an allergist, an ear-nose-throat specialist, a family physician, a  
20 174 lung function technician, a youth public health care physician, and patient representatives.  
21 175 The guideline development group predefined clinically relevant outcomes and divided these  
22 176 into critical (contributing to the overall quality of evidence), important (also relevant to the  
23 177 content of the guideline) and not important outcomes. For each outcome, a minimal clinically  
24 178 important difference was defined *a priori*. The outcomes taken into account in our literature  
25 179 review are summarized in *table 1*, with corresponding minimal clinically important  
26 180 differences.<sup>21-24</sup>

27 181 **Table 1. Patient relevant outcomes and clinical relevance**

| Outcome                            | Importance | Minimal clinically important difference |
|------------------------------------|------------|-----------------------------------------|
| Asthma symptoms                    | Critical   | ACT: 3 c-ACT: (2-)3*                    |
| (Severe) exacerbations             | Critical   | NNT n=10                                |
| Asthma control                     | Critical   | ACT: 3 c-ACT: (2-)3*                    |
| (Disease-specific) quality of life | Important  | PAQLQ: 0.5 (scale 0-7)*                 |
| Change in FEV <sub>1</sub>         | Important  | >5%predicted                            |

28 182 \* or comparable differences on other valid scales representing this outcome

29 183 Abbreviations: ACT: asthma control test; c-ACT: child ACT; NNT: number needed to treat (to prevent one  
30 184 exacerbation); PAQLQ: Pediatric Asthma Quality of Life Questionnaire

31 185 We applied a sensitive search strategy to retrieve all available evidence addressing the  
32 186 clinical question, focusing on systematic reviews (SRs) about asthma and immunotherapy in  
33 187 children. Literature searches were performed in March 2012 for the guideline (from 1960  
34 188 onwards), and updated in April 2015 for the purpose of this review. A second update,  
35 189 including an expansion of the searching scope, was performed in June 2017. (see *table E1 in*  
36 190 *the Online Repository*). In the original search, we searched in the Cochrane Database of

1  
2  
3 191 Systematic Reviews, the Database of Abstracts of Reviews of Effectiveness and the  
4 192 Cochrane Central Trial Register. In the 2017 update we also searched for systematic reviews  
5 193 in the Medline and Embase databases (again from 1960 onwards). Two reviewers (EJvdG,  
6 194 MKT) independently screened the abstracts using predefined inclusion criteria: methodology  
7 195 (SRs), patients (children with allergic asthma), and SCIT and/or SLIT as an intervention.  
8 196 Animal studies, conference abstracts, and studies published in languages other than English,  
9 197 Dutch and German were excluded. Differences between reviewers were resolved by  
10 198 consensus. Selected abstracts were critically appraised with respect to study population,  
11 199 intervention and methodological aspects (e.g. systematic search and selection, inclusion of  
12 200 randomized controlled trials (RCTs)), which led to a further selection. An expert in the field  
13 201 (HdG) judged the selection for completeness.

14  
15 202 All included studies were summarized in evidence tables by two reviewers (EJvdG, MKT).  
16 203 SRs were critically appraised using the AMSTAR checklist (A Measurement Tool to Assess  
17 204 Systematic Reviews).<sup>25</sup> AMSTAR scores range from 0-11, a higher score indicating better  
18 205 quality (less bias). The Jadad scale was used to assess the methodological quality of each  
19 206 included RCT.<sup>26</sup> This score ranges from 0-5, a higher score denoting a better quality. All  
20 207 eligible studies together defined the body of evidence, of which the quality was determined  
21 208 (per relevant outcome and overall quality) and GRADE Profiles were created. Results from  
22 209 SRs and RCTs were pooled, if possible, in meta-analyses using RevMan 5. We calculated  
23 210 standardized mean differences for continuous outcomes, because of the usage of different  
24 211 symptom scales in the underlying studies. We calculated risk ratios for dichotomous  
25 212 outcomes, to compare the probability of these outcomes between the intervention and  
26 213 control groups. In the meta-analyses we used random effects models, because of the  
27 214 possibility of generalization of the outcomes for different allergens, and tested the difference  
28 215 between intervention and control with the inverse variance method, since this method is  
29 216 typically used in meta-analyses to combine the results of independent studies. We reported  
30 217 95% confidence intervals (pre-defined significance level: 0.05). Conclusions were drawn,  
31 218 based on quality and content, per outcome and discussed in the expert group until  
32 219 consensus was reached.

## 33 220 **Patient involvement**

34 221 The guideline development group included patient representatives who helped defining our  
35 222 clinical question, approved outcome measures and assessed its clinical relevancy. The  
36 223 burden of interventions and patient considerations were assessed as part of the GRADE  
37 224 evaluation. Patients were not directly involved in this systematic review since we reviewed  
38 225 published literature.

## 226 Results

### 227 *Literature search and selection*

228 Screening of titles and abstracts yielded 83 eligible studies, 10 of which fulfilled the inclusion  
229 criteria.<sup>16,27-35</sup> After examining these 10 papers in full, 5 more studies were excluded (*figure*  
230 1).

231 Experts in the guideline working group confirmed that no relevant publications were missed.  
232 The updated search (April 2015) revealed 43 additional studies, of which 2 fulfilled the  
233 inclusion criteria.<sup>36,37</sup> Full text examination resulted in exclusion of these 2 studies. The  
234 extended and updated search in June 2017 resulted in 177 hits, of which 6 were selected to  
235 full paper study<sup>38-43</sup>. These studies were systematic reviews in the field of SCIT and/or SLIT  
236 in children with asthma. Most of the included RCT's in these reviews had already been  
237 included in the 2015 search. We only added RCT's of those reviews to our meta-analyses  
238 that have not been included earlier. As a result, we added one study<sup>44</sup>.

239

240 < *figure 1* > *Literature selection*

241

### 242 **Results of SCIT**

#### 243 Description of studies

244 We retrieved one Cochrane SR on the effectiveness of SCIT in patients with asthma ,  
245 including 90 RCTs with a total of 3,792 patients.<sup>16</sup> This was a high-quality review (AMSTAR  
246 score 10/11). Fourteen of the included RCTs were performed in children exclusively; another  
247 24 included children and adults. In a few studies the age inclusion criteria were not clear. The  
248 characteristics of these review are summarized in an evidence table (*see table E2 in the*  
249 *Online Repository*).<sup>16,29,32</sup> Only nine RCTs included in these reviews reported on our  
250 predefined outcomes in children.<sup>45-53</sup> In these nine studies different allergens or  
251 combinations were studied (house dust mite (3), dog dander (1), grass pollen (1), mold (1),  
252 grass pollen/house dust mite (1), tailored combinations (2)). Two RCTs published after the  
253 2010 Cochrane review were retrieved.<sup>34,35</sup> In the first, the clinical efficacy of house dust mite-  
254 specific SCIT in 20 asthmatic children was compared to no intervention in 20 others; patients  
255 were followed up for six months.<sup>34</sup> In the other, the effects of allergen-specific SCIT on  
256 corticosteroid dose in asthmatic children was evaluated.<sup>35</sup> Details of all included RCTs are  
257 summarized in the evidence table (*see table E3 in the Online Repository*).<sup>34,35,45-53</sup>



258 Quality of the evidence

259 Little information was given about the included studies in the Cochrane review; e.g. follow-up  
 260 was not stated. There were also other concerns about the quality of the literature, e.g. not all  
 261 studies were double-blind and placebo-controlled, and randomization procedures were poor.  
 262 Therefore we re-analyzed the individual paediatric studies in the Cochrane review, plus the  
 263 added studies.<sup>34,35</sup> Jadad scores of the single studies are presented in *table 2*.

264 **Table 2. Jadad scores of RCTs on SCIT**

|                              | Randomization* | Blinding** | Withdrawals <sup>#</sup> | Total |
|------------------------------|----------------|------------|--------------------------|-------|
| Adkinson 1997 <sup>45</sup>  | 1              | 1          | 1                        | 3     |
| Altintas 1999 <sup>46</sup>  | 1              | 1          | 1                        | 3     |
| Dreborg 1986 <sup>47</sup>   | 1              | -          | -                        | 1     |
| Hill 1982 <sup>48</sup>      | 1              | -          | -                        | 1     |
| Johnstone 1961 <sup>49</sup> | 2              | 1          | -                        | 3     |
| Johnstone 1968 <sup>50</sup> | 2              | 1          | 1                        | 4     |
| Price 1984 <sup>51</sup>     | 1              | 1          | -                        | 3     |
| Tsai 2010 <sup>34</sup>      | 1              | -          | 1                        | 2     |
| Valovirta 1984 <sup>52</sup> | 1              | -          | 1                        | 2     |
| Warner 1978 <sup>53</sup>    | 1              | 1          | 1                        | 3     |
| Zielen 2010 <sup>35</sup>    | 1              | 1          | 1                        | 3     |

265 \* 1 point if randomization is mentioned; 1 additional point if the method of randomization is appropriate; minus 1  
 266 point if the method of randomization is inappropriate

267 \*\* 1 point if blinding is mentioned; 1 additional point if the method of blinding is appropriate; minus 1 point if the  
 268 method of blinding is inappropriate

269 <sup>#</sup> 1 point if the number and the reasons for withdrawal in each group are stated

270 The quality of the body of evidence for all critical and important outcomes was very low (*table*  
 271 3), mainly due to large risk of bias and indirectness. The large risk of bias was caused by a  
 272 lack of allocation concealment, lack of information on follow-up, and loss to follow-up. The  
 273 reason for downgrading for indirectness was the publication year of the underlying studies;  
 274 populations and interventions were considered inapplicable to current clinical practice.

275 **Table 3. GRADE Evidence Profile SCIT**

| Quality assessment                                     |              |                           |               |                      |             |                      | Number of patients |                 | Effect           |                                                             | Quality       | Importance |
|--------------------------------------------------------|--------------|---------------------------|---------------|----------------------|-------------|----------------------|--------------------|-----------------|------------------|-------------------------------------------------------------|---------------|------------|
| Number of studies                                      | Study design | Risk of bias              | Inconsistency | Indirectness         | Imprecision | Other considerations | SCIT               | No intervention | Relative (95%CI) | Absolute (95%CI)                                            |               |            |
| Asthma symptoms (assessed with: Asthma symptom scores) |              |                           |               |                      |             |                      |                    |                 |                  |                                                             |               |            |
| 5 <sup>a</sup>                                         | RCT          | Very serious <sup>b</sup> | Not serious   | Serious <sup>c</sup> | Not serious | None                 | 136                | 286             | -                | Standardized Mean Difference - 0.04 (95%CI: - 0.42 to 0.33) | ⊕○○○ VERY LOW | CRITICAL   |

| Exacerbations (assessed with: Symptomatic deterioration) |     |                      |             |                           |             |      |                |                |                               |                                          |               |           |
|----------------------------------------------------------|-----|----------------------|-------------|---------------------------|-------------|------|----------------|----------------|-------------------------------|------------------------------------------|---------------|-----------|
| 5 <sup>a</sup>                                           | RCT | Serious <sup>d</sup> | Not serious | Very serious <sup>e</sup> | Not serious | None | 64/253 (25.3%) | 92/153 (60.1%) | Risk ratio 0.7 (0.31 to 0.72) | 343 fewer per 1000 (95%CI: -397 to -265) | ⊕○○○ VERY LOW | CRITICAL  |
| Asthma control – not reported                            |     |                      |             |                           |             |      |                |                |                               |                                          |               |           |
| -                                                        | -   | -                    | -           | -                         | -           | -    | -              | -              | -                             | -                                        | -             | CRITICAL  |
| Quality of life – not reported                           |     |                      |             |                           |             |      |                |                |                               |                                          |               |           |
| -                                                        | -   | -                    | -           | -                         | -           | -    | -              | -              | -                             | -                                        | -             | IMPORTANT |
| Lung function – not reported                             |     |                      |             |                           |             |      |                |                |                               |                                          |               |           |
| -                                                        | -   | -                    | -           | -                         | -           | -    | -              | -              | -                             | -                                        | -             | IMPORTANT |

276 Abbreviations: 95%CI: 95% confidence interval; RCT: randomized controlled trials; SCIT: subcutaneous  
277 immunotherapy

278 a. Studies in Cochrane review Abramson + Tsai

279 b. The underlying studies had a quite large risk of bias, due to lack of allocation concealment, problems with  
280 blinding, and lack of information on follow-up (and loss-to-follow-up)

281 c. We downgraded for indirectness, because the included studies are quite old and maintenance medication may  
282 have changed probably; thus, study populations may alter from nowadays patients with moderate to severe  
283 asthma

284 d. We downgraded for risk of bias, because of problems with blinding and loss-to-follow-up

285 e. We assessed very serious indirectness, because most included studies for this outcome are very old, and  
286 carried out before the ICS-era; thus, patients nowadays differ from study populations

### 287 Critical outcomes

288 Asthma symptoms. Four small studies carried out in children only reported this outcome in  
289 the Cochrane review.<sup>16</sup> We extracted these results from the Cochrane review and updated  
290 these with the results from Tsai et al.<sup>34</sup> Results are presented in *figure 2*.

291

292 <figure 2 >

293

294 The meta-analysis showed no significant effect of SCIT on asthma symptoms.

295 Asthma exacerbations. Five studies (published 1961-1984) in the Cochrane review, carried  
296 out in children only, reported this outcome.<sup>16</sup> No relevant studies of sufficient quality were  
297 published afterwards. Our meta-analysis included 253 patients on immunotherapy and 153  
298 on placebo. The pooled risk ratio was 0.47 (95%CI: 0.31 – 0.72), favouring immunotherapy  
299 (see *figure 3*). The absolute risk reduction was 35%, giving a number needed to treat of 3.

300

301 < figure 3 >

302

303 No studies reported results on the critical outcome asthma control.

304 Important outcomes305 No studies reported results on quality of life or lung function (FEV<sub>1</sub>).306 **Results of SLIT**307 Description of studies and quality of the evidence

308 We retrieved two SRs on SLIT in patients with asthma.<sup>29,32</sup> The updated search in 2017  
 309 resulted in the addition of one RCT<sup>44</sup>. The characteristics of the SRs are summarized in  
 310 evidence table E2 (*Online Repository*). The quality of the reviews was moderate; both had an  
 311 AMSTAR score of 7/11. Weaknesses included the absence of an 'a priori design', exclusion  
 312 of grey literature, not assessing the likelihood of publication bias and not mentioning conflicts  
 313 of interest in one review,<sup>29</sup> and the absence of an 'a priori design', no information about  
 314 excluded studies, too firm conclusions compared to the weak evidence, and not assessing  
 315 the likelihood of publication bias in the other.<sup>32</sup> One review included both children and adults,  
 316 and patients with asthma and/or rhinitis.<sup>29</sup> Because of the quality concerns of both existing  
 317 SRs, we set out to perform a meta-analysis of the original studies that fulfilled our selection  
 318 criteria. Jadad scores of selected studies, as well as an overview of the outcomes of those  
 319 studies, are presented in *table 4*.<sup>24,29,32,44,54-67</sup> Study characteristics are summarized in the  
 320 evidence table (*see table E4 in the Online Repository*).<sup>44,54,55,57,58,60,63-65</sup> We rated the quality  
 321 of evidence to be very low, due to a large risk of bias, imprecision and indirect evidence.

322 **Table 4. Summary of quality and outcome measures of selected RCT's in reviews**  
 323 **Calamita et al, Penagos et al and added Pham-Thi et al.**<sup>29,32, 44</sup>

| Review                     | RCT                           | Eligible                | Jadad-score    |            |                          |       | Reported on asthma symptoms | Reported on exacerbations | Reported on asthma control | Reported on disease specific quality of life | Reported on lung function (FEV <sub>1</sub> ) |
|----------------------------|-------------------------------|-------------------------|----------------|------------|--------------------------|-------|-----------------------------|---------------------------|----------------------------|----------------------------------------------|-----------------------------------------------|
|                            |                               |                         | Randomization* | Blinding** | Withdrawals <sup>#</sup> | Total |                             |                           |                            |                                              |                                               |
| Calamita <sup>29</sup>     | Bahceciler 2001 <sup>54</sup> | Yes                     | 1              | 1          | 1                        | 3     | +                           | -                         | -                          | -                                            |                                               |
|                            | Hirsch 1997 <sup>55</sup>     | Yes                     | 2              | 1          | 1                        | 4     | +                           | -                         | -                          | -                                            |                                               |
|                            | Niu 2004 <sup>24</sup>        | No, conference abstract |                |            |                          |       |                             |                           |                            |                                              |                                               |
|                            | Novembre 1991 <sup>56</sup>   | No, Italian language    |                |            |                          |       |                             |                           |                            |                                              |                                               |
|                            | Pajno 2003 <sup>57</sup>      | Yes                     | 2              | 1          | 1                        | 4     | +                           | -                         | -                          | -                                            | -                                             |
| Pajno 2004 <sup>5,58</sup> | Yes                           | 2                       | 1              | 1          | 4                        | -     | -                           | -                         | -                          | +                                            |                                               |

|                        |                                        |                                                  |   |   |   |   |   |   |   |   |   |
|------------------------|----------------------------------------|--------------------------------------------------|---|---|---|---|---|---|---|---|---|
|                        | Rodriguez Santos 2004 <sup>59</sup>    | No, Spanish language                             |   |   |   |   |   |   |   |   |   |
|                        | Rolinck-Werninghaus 2004 <sup>60</sup> | Yes                                              | 1 | 2 | 0 | 3 | + | - | - | - | - |
|                        | Yuksel 1999 <sup>61</sup>              | No, Spanish language                             |   |   |   |   |   |   |   |   |   |
| Penagos <sup>32</sup>  | Bahceciler 2001 <sup>54</sup>          | Overlap with Calamita                            |   |   |   |   |   |   |   |   |   |
|                        | Caffarelli 2000 <sup>62</sup>          | No, children with asthma not separately analyzed |   |   |   |   |   |   |   |   |   |
|                        | Hirsch 1997 <sup>55</sup>              | Overlap with Calamita                            |   |   |   |   |   |   |   |   |   |
|                        | Ippoliti 2003 <sup>63</sup>            | Yes                                              | 1 | 1 | 0 | 2 | + | - | - | - | + |
|                        | Niu 2006 <sup>64</sup>                 | Yes                                              | 1 | 1 | 1 | 3 | + | - | - | - | + |
|                        | Pajno 2000 <sup>65</sup>               | Yes                                              | 2 | 1 | 0 | 3 | + | - | - | - | - |
|                        | Rolinck-Werninghaus 2004 <sup>60</sup> | Overlap with Calamita                            |   |   |   |   |   |   |   |   |   |
|                        | Tari 1990 <sup>66</sup>                | No, Spanish language                             |   |   |   |   |   |   |   |   |   |
|                        | Vourdas 1998 <sup>67</sup>             | No, children with asthma not separately analyzed |   |   |   |   |   |   |   |   |   |
| Pham-Thi <sup>44</sup> | Yes                                    | 2                                                | 1 | 1 | 4 | + |   |   | + | + |   |
| Total                  |                                        |                                                  |   |   |   | 8 | 0 | 0 | 1 | 4 |   |

324 Abbreviations: FEV<sub>1</sub>: forced expiratory volume in 1 second; RCT: randomized controlled trial

325 \* 1 point if randomization is mentioned; 1 additional point if the method of randomization is appropriate; minus 1  
326 point if the method of randomization is inappropriate

327 \*\* 1 point if blinding is mentioned; 1 additional point if the method of blinding is appropriate; minus 1 point if the  
328 method of blinding is inappropriate

329 # 1 point if the number and the reasons for withdrawal in each group are stated

330 § Same patients as Pajno 2003<sup>67</sup>

### 331 Critical outcomes

332 Asthma symptoms. Eight of the included studies reported on asthma symptoms. Different  
333 symptom scores were used, none of them standardized or validated. Clinical differences in  
334 asthma scores were not defined and most studies reported improvement in the treatment  
335 group as well in the control group. We were not able to compile a meta-analysis of the results  
336 of the individual studies, because of the use of various symptom scales in the included  
337 studies. Since studies did not report results in a clearly comparable way, reporting the results  
338 of the individual studies was considered unreliable.

339 Other critical outcomes. No studies reported results on the critical outcomes exacerbations  
340 and asthma control.

### 341 Important outcomes

342 Quality of life. Pham-Thi et al. published results on quality of life using Childhood Asthma  
343 Questionnaires<sup>44</sup>. The authors reported a difference in severity between SLIT and placebo in  
344 the younger population (age 6-11 years), but not in older children (age 12-16 years). It is not  
345 stated whether this difference is clinically relevant.

346 Lung function. Four studies reported results on lung function (FEV<sub>1</sub>). One of the studies  
347 reported no numeric data on lung function.<sup>64</sup> One study reported no variance (standard  
348 deviation), and no comparison of the baseline data.<sup>63</sup> The two remaining studies reported on  
349 FEV<sub>1</sub> percentage predicted,<sup>58</sup> and reported no significant differences between treatment  
350 groups, neither at baseline nor at follow-up.

1  
2  
3  
4  
5  
6  
7  
8  
9  
10  
11  
12  
13  
14  
15  
16  
17  
18  
19  
20  
21  
22  
23  
24  
25  
26  
27  
28  
29  
30  
31  
32  
33  
34  
35  
36  
37  
38  
39  
40  
41  
42  
43  
44  
45  
46  
47  
48  
49  
50  
51  
52  
53  
54  
55  
56  
57  
58  
59  
60

351

For peer review only

1  
2  
3 352 **Discussion**  
4

5 353 Summary of main results  
6

7 354 Our GRADE systematic review showed no evidence of a significant difference in asthma  
8 355 symptoms between SCIT and placebo in children with allergic asthma, but some evidence for  
9 356 a significant and clinically relevant reduction in asthma exacerbations was found in SCIT-  
10 357 treated children. We have little confidence in the effect estimate, however, due to a large risk  
11 358 of bias and indirectness. Thus, the true effect of SCIT on exacerbations and asthma  
12 359 symptoms in the target population of interest is likely to be substantially different from the  
13 360 estimate of effect. There was absence of evidence on the effects of SCIT on lung function,  
14 361 asthma control, and quality of life in children with allergic asthma. There was no evidence for  
15 362 a beneficial effect of SLIT in reducing asthma symptoms and exacerbations, quality of life  
16 363 and lung function in children with allergic asthma. Our review does not address the efficacy  
17 364 of immunotherapy in children regarding complaints of allergic rhinitis and/or conjunctivitis,  
18 365 without having asthma.  
19  
20  
21  
22  
23  
24  
25

26 366 Quality of the evidence / GRADE methodology  
27

28  
29 367 The overall quality of the evidence about the effectiveness of SCIT and SLIT was very low.  
30 368 This implicates that our confidence in the effect estimates is very limited. The true effect of  
31 369 SCIT and SLIT on patient relevant asthma outcomes in children with asthma may be  
32 370 substantially different from our estimates of the effect. We cannot conclude that the possible  
33 371 desirable effects of SCIT and SLIT outweigh the undesirable effects (e.g. influence on quality  
34 372 of life, adverse events, or increased resource expenditure), nor can we reject that  
35 373 hypothesis. Our concerns about the quality of evidence are based on (very) serious risk of  
36 374 bias and indirectness in the underlying primary studies. Firstly, the quality of many studies  
37 375 had to be downgraded because of risk of bias due to lack of allocation concealment, lack of  
38 376 information on follow-up, and loss to follow-up. Secondly, included studies were  
39 377 heterogeneous in the patients included and allergen extracts used, with different dosing  
40 378 regimens and duration being studied, targeting different inhaled allergens. We have concerns  
41 379 about the potential different responses and the generalizability of the evidence. Thirdly, and  
42 380 most importantly, for SCIT, the quality of the body of evidence was downgraded because of  
43 381 indirectness, since patients in the original studies long ago are likely to differ considerably  
44 382 from patients nowadays.  
45  
46  
47  
48  
49  
50  
51  
52

53  
54 383 Fourth, different studies used variable definitions of asthma exacerbations. We had to use  
55 384 'worsening of asthma', which may not represent real-life patient relevant exacerbations. This  
56  
57  
58  
59  
60

1  
2  
3 385 may decrease the applicability of the evidence. In addition, there were no studies using the  
4 386 predefined important outcomes quality of life and asthma control.

5  
6 387 Finally, and most importantly, we have concerns on comparability of patients. Several  
7 388 included studies dated from the 1980s or earlier, when allergic rhinitis treatment with  
8 389 selective antihistamines and nasal corticosteroids was not available. Against the background  
9 390 of the united airway concept, the comorbidity allergic rhinitis in patients in these studies  
10 391 cannot be compared to patients in clinical practice today.<sup>9</sup> Similarly, widespread use of ICS  
11 392 was not introduced in childhood asthma treatment until the 1990s.<sup>68</sup> Most studies on SCIT in  
12 393 children with asthma were published decades ago, during the pre-ICS era. Although SCIT  
13 394 appeared to be effective in some of the included studies,<sup>49, 50</sup> we cannot draw conclusions  
14 395 from these findings, because the patients in the described studies represent an incomparable  
15 396 group when compared to the child with asthma in contemporary clinical practice. Specifically,  
16 397 it is unclear whether the beneficial effects found in the systematic review of earlier studies is  
17 398 applicable to children with asthma treated according to contemporary guidelines with daily  
18 399 ICS controller therapy.<sup>16</sup>

19  
20  
21  
22  
23  
24  
25  
26  
27 400 In our opinion and that of others, the GRADE approach is superior to former methods of SRs,  
28 401 because it focuses on predefined patient relevant outcomes, predefined minimally clinical  
29 402 important differences and because it judges the complete body of evidence. One RCT  
30 403 among paediatricians studied the influence of different guideline grading systems on  
31 404 clinician's decisions.<sup>69</sup> GRADE showed the largest change in direction on the clinical  
32 405 decision. However, the added value of GRADE on guideline implementation or patient care,  
33 406 has not been formally evaluated, the GRADE approach is still rather complex for non-  
34 407 methodologists.

35  
36  
37  
38  
39  
40 408 To formulate recommendations for clinical practice, not only the body of evidence concerning  
41 409 effectiveness of an intervention is important. Recommendations should balance the benefits  
42 410 and harms of the intervention of interest, and take patient preferences and resource use into  
43 411 account. Since (after critical evaluation) no benefits of SCIT and SLIT for children with  
44 412 asthma were determined, we consider it unlikely that the benefits will exceed the harms.  
45 413 Patient preferences were included in the formulation of our guideline recommendations.

46  
47  
48  
49  
50 414 Agreements and disagreements with other studies or reviews

51  
52  
53 415 Using GRADE and re-analyzing data from children with allergic asthma only, we came to  
54 416 different conclusions on the effectiveness of SCIT and SLIT in children with asthma than the  
55 417 authors of the original SRs. We believe this highlights the importance of using GRADE  
56 418 methodology to systematically review evidence for patient relevant outcomes, not focusing  
57  
58  
59  
60



1  
2  
3 419 on levels of evidence, but on underlying study validity, precision, directness, and applicability  
4 420 in current clinical practice. The 2009 position paper on SLIT describes history, use and  
5 421 applicability of this treatment for allergic rhinitis.<sup>70</sup> It positions SLIT in children as a safe and  
6 422 useful therapy above and after more regular treatment for allergic rhinitis. Potential positive  
7 423 treatment outcome for allergic asthma is however mainly based on literature in adults. We  
8 424 show the lack of evidence and lack of applicability of treatment of immunotherapy for asthma  
9 425 in children. Since we have worries on the applicability of evidence in adults on children (who  
10 426 are still developing their immune system), we think further studies that compare  
11 427 immunotherapy for the contemporary treatment of asthma in children are urgently needed to  
12 428 fill in this gap.

13  
14  
15 429 Recently, a Cochrane SR on SLIT for asthma found a similar lack of data for important  
16 430 outcomes (e.g. exacerbations, symptom scores, quality of life) as we did.<sup>71</sup> Contrary to our  
17 431 study, the authors did no separate analysis for adults and children, and patients with asthma  
18 432 were not separately analyzed from patients without asthma.

### 25 433 **Conclusions**

26  
27  
28 434 Focusing on predefined patient relevant outcomes, and critically appraising the body of  
29 435 evidence using original studies and GRADE methodology, our systematic review on the  
30 436 effects of immunotherapy in children with asthma came to different conclusions than previous  
31 437 systematic reviews. We believe that this underscores the importance of using GRADE  
32 438 methodology in systematically reviewing evidence.

33  
34  
35  
36  
37 439 We found absence of valid applicable evidence on improvement of clinically relevant asthma  
38 440 outcomes in children with allergic asthma using SCIT or SLIT. This absence of evidence is  
39 441 due to serious risk of bias, large clinical heterogeneity between studies, and most importantly  
40 442 due to lack of applicability because studies were performed in the pre-ICS era.

41  
42  
43 443 Since the effect of immunotherapy added to contemporary asthma treatment with daily  
44 444 controller therapy is not clear, the drawbacks of immunotherapy should be considered  
45 445 carefully. SCIT is a complex and intensive form of treatment, associated with a (very) long  
46 446 duration of treatment, and considerable burden to the patient with (monthly) injections under  
47 447 adequate medical supervision due to potential (however rare) dangerous side effects, and  
48 448 may have relatively high costs and resource use. In SLIT the risk of serious side-effects is  
49 449 considerably smaller, but the other drawbacks of immunotherapy apply equally to this  
50 450 treatment. In our opinion therefore, when balancing the absence of evidence on a clear  
51 451 beneficial effect of SCIT or SLIT on clinically relevant patient outcomes in children with  
52 452 asthma with the considerable burden and costs of SCIT and SLIT, we do not recommend this



1  
2  
3  
4  
5  
6  
7  
8  
9  
10  
11  
12  
13  
14  
15  
16  
17  
18  
19  
20  
21  
22  
23  
24  
25  
26  
27  
28  
29  
30  
31  
32  
33  
34  
35  
36  
37  
38  
39  
40  
41  
42  
43  
44  
45  
46  
47  
48  
49  
50  
51  
52  
53  
54  
55  
56  
57  
58  
59  
60

453 treatment to children with asthma until further high-quality evidence from well-designed RCTs  
454 in children comparing SCIT or SLIT to contemporary asthma treatment becomes available.  
455

For peer review only

1  
2  
3 456 **Acknowledgments**  
4

5 457 We like to thank Nicole Boluyt MD, PhD, Diemen, The Netherlands, for her help in the study  
6  
7 458 design and revision of an earlier version of the manuscript.  
8  
9  
10  
11  
12  
13  
14  
15  
16  
17  
18  
19  
20  
21  
22  
23  
24  
25  
26  
27  
28  
29  
30  
31  
32  
33  
34  
35  
36  
37  
38  
39  
40  
41  
42  
43  
44  
45  
46  
47  
48  
49  
50  
51  
52  
53  
54  
55  
56  
57  
58  
59  
60

For peer review only

459 **References**

- 460 1. GINA. Global Strategy For Asthma Management And Prevention. 2012.
- 461 2. British Thoracic Society. British Guideline on the management of asthma. 2011.
- 462 3. de Groot EP, Kreggemeijer WJ, Brand PL. Getting the basics right resolves most  
463 cases of uncontrolled and problematic asthma. *Acta Paediatr.* 2015;104(9):916-21.
- 464 4. Hedlin G, Bush A, Lodrup Carlsen K, Wennergren G, De Benedictis FM, Melen E, et  
465 al. Problematic severe asthma in children, not one problem but many: a GA2LEN initiative.  
466 *Eur Respir J.* 2010;36(1):196-201.
- 467 5. de Groot EP, Duiverman EJ, Brand PL. Comorbidities of asthma during childhood:  
468 possibly important, yet poorly studied. *Eur Respir J.* 2010;36(3):671-8.
- 469 6. Lodrup Carlsen KC, Hedlin G, Bush A, Wennergren G, de Benedictis FM, De Jongste  
470 JC, et al. Assessment of problematic severe asthma in children. *Eur Respir J.*  
471 2011;37(2):432-40.
- 472 7. de Groot EP, Nijkamp A, Duiverman EJ, Brand PL. Allergic rhinitis is associated with  
473 poor asthma control in children with asthma. *Thorax.* 2012;67(7):582-7.
- 474 8. Shamsain MH, Shamsian N. Prevalence and severity of asthma, rhinitis, and atopic  
475 eczema in 13- to 14-year-old schoolchildren from the northeast of England. *Ann Allergy*  
476 *Asthma Immunol.* 2001;86(4):428-32.
- 477 9. Brozek JL, Bousquet J, Baena-Cagnani CE, Bonini S, Canonica GW, Casale TB, et  
478 al. Allergic Rhinitis and its Impact on Asthma (ARIA) guidelines: 2010 revision. *J Allergy Clin*  
479 *Immunol.* 2010;126(3):466-76.
- 480 10. Kersten ET, van Leeuwen JC, Brand PL, Duiverman EJ, de Jongh FH, Thio BJ, et al.  
481 Effect of an intranasal corticosteroid on exercise induced bronchoconstriction in asthmatic  
482 children. *Pediatr Pulmonol.* 2012;47(1):27-35.
- 483 11. Rachelefsky G, Farrar JR. A control model to evaluate pharmacotherapy for allergic  
484 rhinitis in children. *JAMA Pediatr.* 2013;167(4):380-6.
- 485 12. de Groot H, Brand PL, Fokkens WF, Berger MY. Allergic rhinoconjunctivitis in  
486 children. *BMJ.* 2007;335(7627):985-8.
- 487 13. Dretzke J, Meadows A, Novielli N, Huissoon A, Fry-Smith A, Meads C. Subcutaneous  
488 and sublingual immunotherapy for seasonal allergic rhinitis: a systematic review and indirect  
489 comparison. *J Allergy Clin Immunol.* 2013;131(5):1361-6.
- 490 14. Bufe A, Eberle P, Franke-Beckmann E, Funck J, Kimmig M, Klimek L, et al. Safety  
491 and efficacy in children of an SQ-standardized grass allergen tablet for sublingual  
492 immunotherapy. *J Allergy Clin Immunol.* 2009;123(1):167-73 e7.

- 1  
2  
3 493 15. Wahn U, Tabar A, Kuna P, Halcken S, Montagut A, de Beaumont O, et al. Efficacy and  
4 494 safety of 5-grass-pollen sublingual immunotherapy tablets in pediatric allergic  
5 495 rhinoconjunctivitis. *J Allergy Clin Immunol*. 2009;123(1):160-6 e3.  
6  
7 496 16. Abramson MJ, Puy RM, Weiner JM. Injection allergen immunotherapy for asthma.  
8 497 *Cochrane Database Syst Rev*. 2010(8):CD001186.  
9  
10 498 17. Dutch Pediatric Society. NVK Richtlijn Astma bij kinderen [Dutch pediatric asthma  
11 499 guidelines]. 2013.  
12  
13 500 <http://www.nvk.nl/tabid/1558/articleType/ArticleView/articleId/708/default.aspx>  
14  
15 501 18. Guyatt G, Oxman AD, Akl EA, Kunz R, Vist G, Brozek J, et al. GRADE guidelines: 1.  
16 502 Introduction-GRADE evidence profiles and summary of findings tables. *J Clin Epidemiol*.  
17 503 2011;64(4):383-94.  
18  
19 504 19. Guyatt GH, Oxman AD, Kunz R, Atkins D, Brozek J, Vist G, et al. GRADE guidelines:  
20 505 2. Framing the question and deciding on important outcomes. *J Clin Epidemiol*.  
21 506 2011;64(4):395-400.  
22  
23 507 20. Atkins D, Eccles M, Flottorp S, Guyatt GH, Henry D, Hill S, et al. Systems for grading  
24 508 the quality of evidence and the strength of recommendations I: critical appraisal of existing  
25 509 approaches The GRADE Working Group. *BMC Health Serv Res*. 2004;4(1):38.  
26  
27 510 21. Reddel HK, Taylor DR, Bateman ED, Boulet LP, Boushey HA, Busse WW, et al. An  
28 511 official American Thoracic Society/European Respiratory Society statement: asthma control  
29 512 and exacerbations: standardizing endpoints for clinical asthma trials and clinical practice. *Am*  
30 513 *J Respir Crit Care Med*. 2009;180(1):59-99.  
31  
32 514 22. Schatz M, Kosinski M, Yaras AS, Hanlon J, Watson ME, Jhingran P. The minimally  
33 515 important difference of the Asthma Control Test. *J Allergy Clin Immunol*. 2009;124(4):719-23  
34 516 e1.  
35  
36 517 23. Vasbinder EC, Janssens HM, Rutten-van Molken MP, van Dijk L, de Winter BC, de  
37 518 Groot RC, et al. e-Monitoring of Asthma Therapy to Improve Compliance in children using a  
38 519 real-time medication monitoring system (RTMM): the e-MATIC study protocol. *BMC medical*  
39 520 *informatics and decision making*. 2013;13:38.  
40  
41 521 24. Niu C, Wang J, Huang J, Lue K, Chen W. Efficacy and safety of sublingual  
42 522 immunotherapy with high dose house dust mite extract in asthmatic children: a multicenter  
43 523 randomized double-blind, and placebo-controlled study. *J Allergy Clin Immunol*.  
44 524 2004;113(Suppl 2):S108.  
45  
46 525 25. Shea BJ, Grimshaw JM, Wells GA, Boers M, Andersson N, Hamel C, et al.  
47 526 Development of AMSTAR: a measurement tool to assess the methodological quality of  
48 527 systematic reviews. *BMC Med Res Methodol*. 2007;7:10.  
49  
50  
51  
52  
53  
54  
55  
56  
57  
58  
59  
60

- 1  
2  
3 528 26. Jadad AR, Moore RA, Carroll D, Jenkinson C, Reynolds DJ, Gavaghan DJ, et al.  
4 529 Assessing the quality of reports of randomized clinical trials: is blinding necessary? *Control*  
5 530 *Clin Trials*. 1996;17(1):1-12.  
6  
7 531 27. Alzakar RH, Alsamarai AM. Efficacy of immunotherapy for treatment of allergic  
8 532 asthma in children. *Allergy Asthma Proc*. 2010;31(4):324-30.  
9  
10 533 28. Antunez C, Mayorga C, Corzo JL, Jurado A, Torres MJ. Two year follow-up of  
11 534 immunological response in mite-allergic children treated with sublingual immunotherapy.  
12 535 Comparison with subcutaneous administration. *Pediatr Allergy Immunol*. 2008;19(3):210-8.  
13  
14 536 29. Calamita Z, Saconato H, Pela AB, Atallah AN. Efficacy of sublingual immunotherapy  
15 537 in asthma: systematic review of randomized-clinical trials using the Cochrane Collaboration  
16 538 method. *Allergy*. 2006;61(10):1162-72.  
17  
18 539 30. Hoeks SB, de Groot H, Hoekstra MO. [Sublingual immunotherapy in children with  
19 540 asthma or rhinoconjunctivitis: not enough evidence because of poor quality of the studies; a  
20 541 systematic review of literature]. *Ned Tijdschr Geneesk*. 2008;152(5):261-8.  
21  
22 542 31. Keles S, Karakoc-Aydiner E, Ozen A, Izgi AG, Tevetoglu A, Akkoc T, et al. A novel  
23 543 approach in allergen-specific immunotherapy: combination of sublingual and subcutaneous  
24 544 routes. *J Allergy Clin Immunol*. 2011;128(4):808-15 e7.  
25  
26 545 32. Penagos M, Passalacqua G, Compalati E, Baena-Cagnani CE, Orozco S, Pedroza A,  
27 546 et al. Metaanalysis of the efficacy of sublingual immunotherapy in the treatment of allergic  
28 547 asthma in pediatric patients, 3 to 18 years of age. *Chest*. 2008;133(3):599-609.  
29  
30 548 33. Sopo SM, Macchiaiolo M, Zorzi G, Tripodi S. Sublingual immunotherapy in asthma  
31 549 and rhinoconjunctivitis; systematic review of paediatric literature. *Arch Dis Child*.  
32 550 2004;89(7):620-4.  
33  
34 551 34. Tsai TC, Lu JH, Chen SJ, Tang RB. Clinical efficacy of house dust mite-specific  
35 552 immunotherapy in asthmatic children. *Pediatr Neonatol*. 2010;51(1):14-8.  
36  
37 553 35. Zielen S, Kardos P, Madonini E. Steroid-sparing effects with allergen-specific  
38 554 immunotherapy in children with asthma: a randomized controlled trial. *J Allergy Clin*  
39 555 *Immunol*. 2010;126(5):942-9.  
40  
41 556 36. Hui Y, Li L, Qian J, Guo Y, Zhang X, Zhang X. Efficacy analysis of three-year  
42 557 subcutaneous SQ-standardized specific immunotherapy in house dust mite-allergic children  
43 558 with asthma. *Exp Ther Med*. 2014;7(3):630-4.  
44  
45 559 37. Lozano J, Cruz MJ, Piquer M, Giner MT, Plaza AM. Assessing the efficacy of  
46 560 immunotherapy with a glutaraldehyde-modified house dust mite extract in children by  
47 561 monitoring changes in clinical parameters and inflammatory markers in exhaled breath. *Int*  
48 562 *Arch Allergy Immunol*. 2014;165(2):140-7.  
49  
50  
51  
52  
53  
54  
55  
56  
57  
58  
59  
60

- 1  
2  
3 563 38. Compalati E, Passalacqua G, Bonini M, Canonica GW. The efficacy of sublingual  
4 564 immunotherapy for house dust mites respiratory allergy: results of a GA2LEN meta-analysis.  
5 565 Allergy 2009;64:1570-9.  
6  
7  
8 566 39. Lu Y, XU L, Xia M, Li Y, Cao L. The efficacy and safety of subcutaneous  
9 567 immunotherapy in mite-sensitized subjects with asthma: a meta-analysis. Respir Care 2015;  
10 568 60: 269-78.  
11  
12  
13 569 40. Kim JM, Lin SY, Suarez-Cuervo C, Chelladurai Y, Ramanathan M, Segal JB, et al.  
14 570 Allergen-specific immunotherapy for pediatric asthma and rhinoconjunctivitis: a systematic  
15 571 review. Pediatrics 2013;131:1155-67.  
16  
17  
18 572 41. Liao W, Hu Q, Shen L-L, Hu Y, Tao H-F, Li H-F, et al. Sublingual immunotherapy for  
19 573 asthmatic children sensitized to house dust mite. Medicine 2015;94:e701.  
20  
21  
22  
23 574 42. Elliot J, Kelly SE, Johnston A, Skidmire B, Gomes T, Wells GA. Allergen  
24 575 immunotherapy for the treatment of allergic rhinitis and/or asthma: an umbrella review. CMAJ  
25 576 Open 2017;5(2):E373-E385.  
26  
27  
28 577 43. Lin SY, Erekosima N, Kim JM, Ramanathan M, Suarez-Cuervo C, Chelladurai Y, et  
29 578 al. Sublingual immunotherapy for the treatment of allergic rhinoconjunctivitis and asthma.  
30 579 JAMA 2013;309:1278-88.  
31  
32  
33 580 44. Pham-Thi N, Scheinmann P, Fadel R, Combebias A, Andre C. Assessment of  
34 581 sublingual immunotherapy efficacy in children with house dust mite-induced allergic asthma  
35 582 optimally controlled by pharmacologic treatment and mite-avoidance measures. Pediatr  
36 583 Allergy Immunol 2007; 18: 47-57.  
37  
38  
39 584 45. Adkinson NF, Jr., Eggleston PA, Eney D, Goldstein EO, Schuberth KC, Bacon JR, et  
40 585 al. A controlled trial of immunotherapy for asthma in allergic children. N Engl J Med.  
41 586 1997;336(5):324-31.  
42  
43 587 46. Altintas D, Akmanlar N, Guneser S, Burgut R, Yilmaz M, Bugdayci R, et al.  
44 588 Comparison between the use of adsorbed and aqueous immunotherapy material in  
45 589 Dermatophagoides pteronyssinus sensitive asthmatic children. Allergol Immunopathol  
46 590 (Madr). 1999;27(6):309-17.  
47  
48 591 47. Dreborg S, Agrell B, Foucard T, Kjellman NI, Koivikko A, Nilsson S. A double-blind,  
49 592 multicenter immunotherapy trial in children, using a purified and standardized Cladosporium  
50 593 herbarum preparation. I. Clinical results. Allergy. 1986;41(2):131-40.  
51  
52  
53  
54  
55  
56  
57  
58  
59  
60

- 1  
2  
3 594 48. Hill DJ, Hosking CS, Shelton MJ, Turner MW. Failure of hyposensitisation in  
4 595 treatment of children with grass-pollen asthma. *Br Med J (Clin Res Ed)*. 1982;284(6312):306-  
5 596 9.  
6  
7 597 49. Johnstone DE, Crump L. Value of hyposensitization therapy for perennial bronchial  
8 598 asthma in children. *Pediatrics*. 1961;27:39-44.  
9  
10 599 50. Johnstone DE, Dutton A. The value of hyposensitization therapy for bronchial asthma  
11 600 in children--a 14-year study. *Pediatrics*. 1968;42(5):793-802.  
12  
13 601 51. Price JF, Warner JO, Hey EN, Turner MW, Soothill JF. A controlled trial of  
14 602 hyposensitization with adsorbed tyrosine *Dermatophagoides pteronyssinus* antigen in  
15 603 childhood asthma: *in vivo* aspects. *Clin Allergy*. 1984;14(3):209-19.  
16  
17 604 52. Valovirta E, Koivikko A, Vanto T, Viander M, Ingeman L. Immunotherapy in allergy to  
18 605 dog: a double-blind clinical study. *Ann Allergy*. 1984;53(1):85-8.  
19  
20 606 53. Warner JO, Price JF, Soothill JF, Hey EN. Controlled trial of hyposensitisation to  
21 607 *Dermatophagoides pteronyssinus* in children with asthma. *Lancet*. 1978;2(8096):912-5.  
22  
23 608 54. Bahceciler NN, Isik U, Barlan IB, Basaran MM. Efficacy of sublingual immunotherapy  
24 609 in children with asthma and rhinitis: a double-blind, placebo-controlled study. *Pediatr*  
25 610 *Pulmonol*. 2001;32(1):49-55.  
26  
27 611 55. Hirsch T, Sahn M, Leupold W. Double-blind placebo-controlled study of sublingual  
28 612 immunotherapy with house dust mite extract (*D.pt.*) in children. *Pediatr Allergy Immunol*.  
29 613 1997;8(1):21-7.  
30  
31 614 56. Novembre E, Marano E, Bernardini R. Sublingual immunotherapy in the treatment of  
32 615 allergic asthma in children: a controlled study. *Riv Ital Pediatr (IJP)*. 1991;17:75-8.  
33  
34 616 57. Pajno GB, Vita D, Parmiani S, Caminiti L, La Grutta S, Barberio G. Impact of  
35 617 sublingual immunotherapy on seasonal asthma and skin reactivity in children allergic to  
36 618 *Parietaria* pollen treated with inhaled fluticasone propionate. *Clin Exp Allergy*.  
37 619 2003;33(12):1641-7.  
38  
39 620 58. Pajno GB, Passalacqua G, Vita D, Caminiti L, Parmiani S, Barberio G. Sublingual  
40 621 immunotherapy abrogates seasonal bronchial hyperresponsiveness in children with  
41 622 *Parietaria*-induced respiratory allergy: a randomized controlled trial. *Allergy*. 2004;59(8):883-  
42 623 7.  
43  
44 624 59. Rodriguez Santos O. [Sublingual immunotherapy with allergenic extract of  
45 625 *Dermatophagoides pteronyssinus* in asthmatic children]. *Rev Alerg Mex*. 2004;51(5):177-80.  
46  
47 626 60. Rolinck-Werninghaus C, Wolf H, Liebke C, Baars JC, Lange J, Kopp MV, et al. A  
48 627 prospective, randomized, double-blind, placebo-controlled multi-centre study on the efficacy  
49 628 and safety of sublingual immunotherapy (SLIT) in children with seasonal allergic  
50 629 rhinoconjunctivitis to grass pollen. *Allergy*. 2004;59(12):1285-93.  
51  
52  
53  
54  
55  
56  
57  
58  
59  
60



- 1  
2  
3 630 61. Yuksel H, Tanac R, Gousseinov A, Demir E. Sublingual immunotherapy and influence  
4 631 on urinary leukotrienes in seasonal pediatric allergy. *J Investig Allergol Clin Immunol*.  
5 632 1999;9:305-13.  
6  
7 633 62. Caffarelli C, Sensi LG, Marcucci F. Preseasonal local allergoid immunotherapy to  
8 634 grass pollen in children: a double-blind, placebo-controlled, randomized trial. *Allergy*.  
9 635 2000;55:1142-7.  
10  
11 636 63. Ippoliti F, De Santis W, Volterrani A, Lenti L, Canitano N, Lucarelli S, et al.  
12 637 Immunomodulation during sublingual therapy in allergic children. *Pediatr Allergy Immunol*.  
13 638 2003;14(3):216-21.  
14  
15 639 64. Niu CK, Chen WY, Huang JL, Lue KH, Wang JY. Efficacy of sublingual  
16 640 immunotherapy with high-dose mite extracts in asthma: a multi-center, double-blind,  
17 641 randomized, and placebo-controlled study in Taiwan. *Respir Med*. 2006;100(8):1374-83.  
18  
19 642 65. Pajno GB, Morabito L, Barberio G, Parmiani S. Clinical and immunologic effects of  
20 643 long-term sublingual immunotherapy in asthmatic children sensitized to mites: a double-blind,  
21 644 placebo-controlled study. *Allergy*. 2000;55(9):842-9.  
22  
23 645 66. Tari MG, Mancino M, Monti G. Efficacy of sublingual immunotherapy in patients with  
24 646 rhinitis and asthma due to house dust mite. A double-blind study. *Allergol Immunopathol*  
25 647 (Madr). 1990;18(5):277-84.  
26  
27 648 67. Vourdas D, Syrigou E, Potamianou P, Carat F, Batard T, André C, et al. Double-blind,  
28 649 placebo-controlled evaluation of sublingual immunotherapy with standardized olive pollen  
29 650 extract in pediatric patients with allergic rhinoconjunctivitis and mild asthma due to olive  
30 651 pollen sensitization. *Allergy* 1998;53:662-72.  
31  
32 652 68. van Essen-Zandvliet EE, Hughes MD, Waalkens HJ, Duiverman EJ, Pocock SJ,  
33 653 Kerrebijn KF. Effects of 22 months of treatment with inhaled corticosteroids and/or beta-2-  
34 654 agonists on lung function, airway responsiveness, and symptoms in children with asthma.  
35 655 The Dutch Chronic Non-specific Lung Disease Study Group. *Am Rev Respir Dis*.  
36 656 1992;146(3):547-54.  
37  
38 657 69. Cuello Garcia CA, Pachecho Alvaredo KP, Pérez Gaxiola G. Grading  
39 658 recommendations in clinical practice guidelines: randomised experimental evaluation of four  
40 659 different systems. *Arch Dis Child* 2011;96:723-8.  
41  
42 660 70. Canonica GW, Bousquet J, Casale T, Lockey RF, Baena-Cagnani CE, Pawankar R,  
43 661 et al. Sub-lingual immunotherapy: world allergy organization position paper 2009. *World*  
44 662 *Allergy Organ J*. 2009;2(11):233-8  
45  
46 663 71. Normansell R, Kew KM, Bridgman AL. Sublingual immunotherapy for asthma.  
47 664 *Cochrane Database Syst Rev*. 2015(8):CD011293.  
48  
49  
50  
51  
52  
53  
54  
55  
56  
57  
58  
59  
60



666 **Figure legends**

667 Figure 1. Literature search and selection

668 Figure 2. Meta-analysis of SCIT vs. placebo, outcome asthma symptoms. *Abbreviations: SD:*  
669 *Standard deviation; Std: Standardized; IV: Inverse Variance; random: random effect model; 95%CI: 95%*  
670 *Confidence Interval*

671 Figure 3. Meta-analysis of SCIT vs. placebo, outcome asthma exacerbations. *Abbreviations:*  
672 *95%CI: 95% Confidence Interval; IV: Inverse Variance*

For peer review only

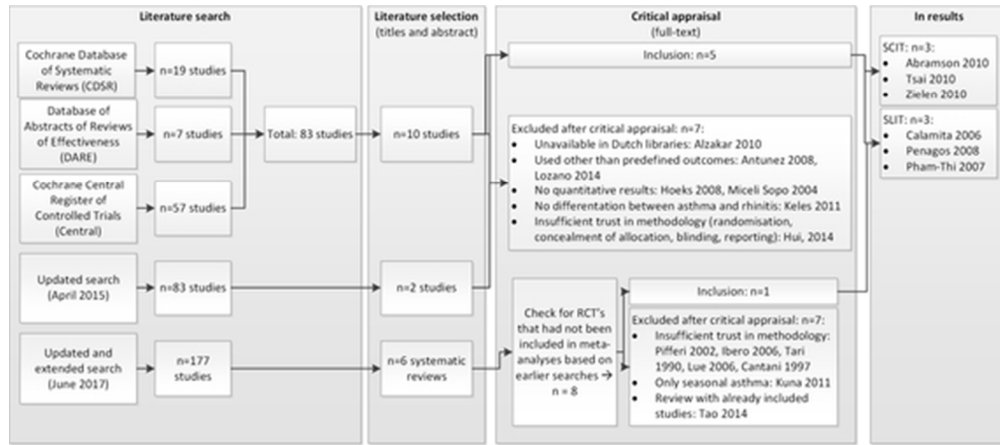

Literature search and selection

24x10mm (600 x 600 DPI)

Peer review only

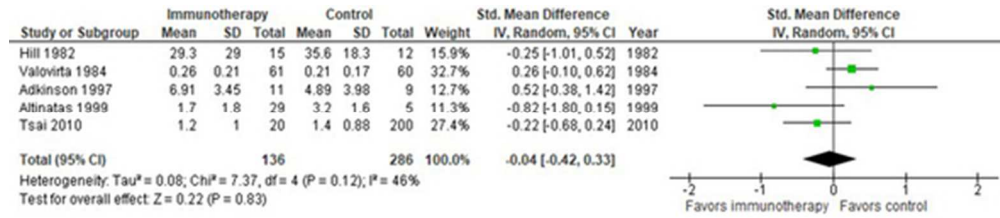

Figure 2. Meta-analysis of SCIT vs. placebo, outcome asthma symptoms. Abbreviations: SD: Standard deviation; Std: Standardized; IV: Inverse Variance; random: random effect model; 95%CI: 95% Confidence Interval

50x10mm (300 x 300 DPI)

peer review only

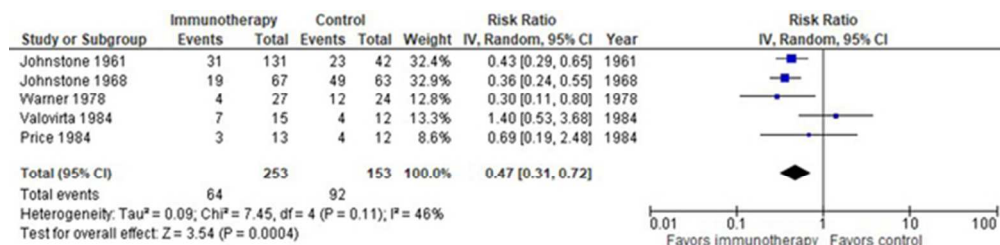

Figure 3. Meta-analysis of SCIT vs. placebo, outcome asthma exacerbations. Abbreviations: 95%CI: 95% Confidence Interval; IV: Inverse Variance

54x13mm (300 x 300 DPI)

peer review only

1  
2  
3  
4  
5  
6  
7  
8  
9  
10  
11  
12  
13  
14  
15  
16  
17  
18  
19  
20  
21  
22  
23  
24  
25  
26  
27  
28  
29  
30  
31  
32  
33  
34  
35  
36  
37  
38  
39  
40  
41  
42  
43  
44  
45  
46  
47  
48  
49  
50  
51  
52  
53  
54  
55  
56  
57  
58  
59  
60

**Table E1. Literature search**

| <b>Search Cochrane Databases of Systematic Reviews, Database of Abstracts of Reviews of Effectiveness, and Central; Literature search 2015, April 25<sup>th</sup></b> |                                                                                                                                                                                                                                    |
|-----------------------------------------------------------------------------------------------------------------------------------------------------------------------|------------------------------------------------------------------------------------------------------------------------------------------------------------------------------------------------------------------------------------|
| 1.                                                                                                                                                                    | "asthmazoeacties jan 2012".ti. (0)                                                                                                                                                                                                 |
| 2.                                                                                                                                                                    | asthma.tw. (14671)                                                                                                                                                                                                                 |
| 3.                                                                                                                                                                    | Bronchial Spasm.tw. (15)                                                                                                                                                                                                           |
| 4.                                                                                                                                                                    | asthma*.tw. (17541)                                                                                                                                                                                                                |
| 5.                                                                                                                                                                    | wheez*.tw. (869)                                                                                                                                                                                                                   |
| 6.                                                                                                                                                                    | bronchospas*.tw. (777)                                                                                                                                                                                                             |
| 7.                                                                                                                                                                    | (bronch* adj8 spas*).tw. (52)                                                                                                                                                                                                      |
| 8.                                                                                                                                                                    | bronchoconstrict*.tw. (1663)                                                                                                                                                                                                       |
| 9.                                                                                                                                                                    | (bronch* adj8 constrict*).tw. (71)                                                                                                                                                                                                 |
| 10.                                                                                                                                                                   | airway* inflammation*.tw. (704)                                                                                                                                                                                                    |
| 11.                                                                                                                                                                   | or/2-10 (18894)                                                                                                                                                                                                                    |
| 12.                                                                                                                                                                   | immunotherap*.kw,tw. (2803)                                                                                                                                                                                                        |
| 13.                                                                                                                                                                   | 11 and 12 (473)                                                                                                                                                                                                                    |
| 14.                                                                                                                                                                   | subcutaneou*.kw,tw. (8020)                                                                                                                                                                                                         |
| 15.                                                                                                                                                                   | 12 and 14 (259)                                                                                                                                                                                                                    |
| 16.                                                                                                                                                                   | 15 (259)                                                                                                                                                                                                                           |
| 17.                                                                                                                                                                   | limit 16 to yr="2008 -Current" (57)                                                                                                                                                                                                |
| <b>Search Medline 2017, June, 2<sup>nd</sup></b>                                                                                                                      |                                                                                                                                                                                                                                    |
| 1                                                                                                                                                                     | "Effect of one-year subcutaneous and sublingual immunotherapy on clinical and laboratory parameters in children with rhinitis and asthma: a randomized, placebo-controlled, double-blind, double-dummy study".fc_titl. (1)         |
| 2                                                                                                                                                                     | "A double-blind, placebo-controlled study of house dust mite immunotherapy in Chinese asthmatic patients".fc_titl. (1)                                                                                                             |
| 3                                                                                                                                                                     | "Effect of specific immunotherapy added to pharmacologic treatment and allergen avoidance in asthmatic patients allergic to house dust mite".fc_titl. (1)                                                                          |
| 4                                                                                                                                                                     | "abramson\$.fc_auts. and "Injection allergen immunotherapy for asthma".fc_titl. (1)                                                                                                                                                |
| 5                                                                                                                                                                     | "Efficacy of sublingual immunotherapy in asthma: systematic review of randomized-clinical trials using the Cochrane Collaboration method".fc_titl. (1)                                                                             |
| 6                                                                                                                                                                     | "Metaanalysis of the efficacy of sublingual immunotherapy in the treatment of allergic asthma in pediatric patients".fc_titl. (1)                                                                                                  |
| 7                                                                                                                                                                     | "Normansell\$.fc_auts. and "Sublingual immunotherapy for asthma".fc_titl. (1)                                                                                                                                                      |
| 8                                                                                                                                                                     | "Efficacy of sublingual immunotherapy in patients with rhinitis and asthma due to house dust mite. A double-blind study".fc_titl. (1)                                                                                              |
| 9                                                                                                                                                                     | "Double-blind, placebo-controlled evaluation of sublingual immunotherapy with standardized olive pollen extract in pediatric ".fc_titl. (1)                                                                                        |
| 10                                                                                                                                                                    | "Clinical and immunologic effects of long-term sublingual immunotherapy in asthmatic children sensitized to mites: a double-blind, placebo-controlled ".fc_titl. (1)                                                               |
| 11                                                                                                                                                                    | "Efficacy of sublingual immunotherapy with high-dose mite extracts in asthma: a multi-center, double-blind, randomized, and placebo-controlled study in Taiwan".fc_titl. (1)                                                       |
| 12                                                                                                                                                                    | "Immunomodulation during sublingual therapy in allergic children".fc_titl. (1)                                                                                                                                                     |
| 13                                                                                                                                                                    | "Preseasonal local allergoid immunotherapy to grass pollen in children: a double-blind, placebo-controlled, randomized trial".fc_titl. (1)                                                                                         |
| 14                                                                                                                                                                    | "Sublingual immunotherapy and influence on urinary leukotrienes in seasonal pediatric allergy".fc_titl. (1)                                                                                                                        |
| 15                                                                                                                                                                    | "A prospective, randomized, double-blind, placebo-controlled multi-centre study on the efficacy and safety of sublingual immunotherapy (SLIT) in children with seasonal allergic rhinoconjunctivitis to grass pollen".fc_titl. (1) |
| 16                                                                                                                                                                    | "Sublingual immunotherapy with allergenic extract of Dermatophagoides pteronyssinus in asthmatic children".fc_titl. (1)                                                                                                            |
| 17                                                                                                                                                                    | "Sublingual immunotherapy abrogates seasonal bronchial hyperresponsiveness in children with Parietaria-induced respiratory allergy: a randomized controlled trial. ".fc_titl. (1)                                                  |
| 18                                                                                                                                                                    | "Impact of sublingual immunotherapy on seasonal asthma and skin reactivity in children allergic to Parietaria pollen treated with ".fc_titl. (1)                                                                                   |

19 "Double-blind placebo-controlled study of sublingual immunotherapy with house dust mite extract  
".fc\_titl. (1)

20 "Efficacy of sublingual immunotherapy in children with asthma and rhinitis: a double-blind, placebo-  
controlled study. ".fc\_titl. (1)

21 or/1-3 (3)

22 or/4-20 (17)

23 21 or 22 (20)

24 "controle refs slit scit".ti. (0)

25 asthma/ or bronchial spasm/ (118686)

26 (asthma\* or wheez\* or bronchospas\* or bronchoconstrict\* or (airway\* adj inflammat\*)).tw. (155964)

27 (asthma\* or wheez\* or bronchospas\* or bronchoconstrict\* or (airway\* adj inflammat\*)).kf. (15593)

28 or/25-27 (176447)

29 23 and 28 (19)

30 23 not 29 (1)

31 rhinitis, allergic, perennial/ or rhinitis, allergic, seasonal/ (18469)

**32 28 or 31 (188701)=P**

33 Immunotherapy/ (36085)

34 Sublingual Immunotherapy/ (231)

35 Desensitization, Immunologic/ (9795)

36 (SCIT or SLIT or (sublingual adj1 immunotherap\*) or (subcutaneous adj1 immunotherap\*)).tw. (16817)

37 (SCIT or SLIT or (sublingual adj1 immunotherap\*) or (subcutaneous adj1 immunotherap\*)).kf. (442)

38 or/33-37 (61196)

39 "Injections, Subcutaneous"/ (31338)

40 33 and 39 (294)

**41 34 or 35 or 36 or 37 or 40 (26000)=I**

42 28 and 41 (3043)

43 "filter systematic reviews".ti. (0)

44 meta analysis.pt. (81124)

45 (meta-anal\$ or metaanal\$).af. (144025)

46 (quantitativ\$ adj10 (review\$ or overview\$)).tw. (6863)

47 (systematic\$ adj10 (review\$ or overview\$)).tw. (119262)

48 (methodologic\$ adj10 (review\$ or overview\$)).tw. (9132)

49 (quantitativ\$ adj10 (review\$ or overview\$)).kf. (32)

50 (systematic\$ adj10 (review\$ or overview\$)).kf. (8208)

51 (methodologic\$ adj10 (review\$ or overview\$)).kf. (36)

52 medline.tw. and review.pt. (64452)

53 (pooled adj3 analy\*).tw. (14081)

54 (pooled adj3 analy\*).kf. (128)

55 "cochrane\$".fc\_jour. (13410)

**56 or/44-55 (258042)**

57 randomized-controlled-trial.pt. (465042)

58 controlled-clinical-trial.pt. (94188)

59 randomized controlled trial/ (465042)

60 randomi?ed controlled trial?.tw. (131360)

61 random-allocation.tw,kf. (1445)

62 double-blind-method.tw,kf. (456)

63 single-blind-method.tw,kf. (81)

64 (random adj8 (selection? or sample?)).tw. (40888)

65 random\$.tw. (952984)

**66 or/57-65 (1156986)**

67 "rct filter sprec".ti. (0)

68 (child??? or childhood or infant\* or p?ediatr\* or perinat\* or neonat\* or newborn\* or infan\* or boy? or  
girl? or kid? or schoolage\* or juvenil\* or adolescen\* or toddler?).tw. (2058217)

69 exp Child/ (1759435)

70 exp infant/ (1058929)

71 "Adolescent"/ (1847650)

**72 or/68-71 (3858822)**

|                                                 |                                                                                                                                                                                                                                    |
|-------------------------------------------------|------------------------------------------------------------------------------------------------------------------------------------------------------------------------------------------------------------------------------------|
| 73                                              | "filter child".ti. (0)                                                                                                                                                                                                             |
| 74                                              | 23 and 72 (19)                                                                                                                                                                                                                     |
| 75                                              | 23 not 74 (1)                                                                                                                                                                                                                      |
| 76                                              | 32 and 41 and 56 (184)                                                                                                                                                                                                             |
| 77                                              | <b>32 and 41 and 72 and 56 (90) systrev</b>                                                                                                                                                                                        |
| <b>Search Embase 2017, June, 2<sup>nd</sup></b> |                                                                                                                                                                                                                                    |
| 1                                               | asthma/ (202909)                                                                                                                                                                                                                   |
| 2                                               | bronchospasm/ (25054)                                                                                                                                                                                                              |
| 3                                               | bronchoconstriction/ (1300)                                                                                                                                                                                                        |
| 4                                               | respiratory tract inflammation/ or allergic airway inflammation/ (11606)                                                                                                                                                           |
| 5                                               | (asthma* or wheez* or bronchospas* or bronchoconstrict* or (airway* adj inflammat*)).tw. (215497)                                                                                                                                  |
| 6                                               | (asthma* or wheez* or bronchospas* or bronchoconstrict* or (airway* adj inflammat*)).kw. (51383)                                                                                                                                   |
| 7                                               | perennial rhinitis/ (3627)                                                                                                                                                                                                         |
| 8                                               | <b>or/1-7 (279683)=P</b>                                                                                                                                                                                                           |
| 9                                               | sublingual immunotherapy/ (1695)                                                                                                                                                                                                   |
| 10                                              | immunotherapy/ (67533)                                                                                                                                                                                                             |
| 11                                              | subcutaneous drug administration/ (97428)                                                                                                                                                                                          |
| 12                                              | 10 and 11 (1148)                                                                                                                                                                                                                   |
| 13                                              | subcutaneous immunotherapy/ (1226)                                                                                                                                                                                                 |
| 14                                              | (SCIT or SLIT or (sublingual adj1 immunotherap*) or (subcutaneous adj1 immunotherap*)).tw. (19513)                                                                                                                                 |
| 15                                              | (SCIT or SLIT or (sublingual adj1 immunotherap*) or (subcutaneous adj1 immunotherap*)).kw. (1765)                                                                                                                                  |
| 16                                              | <b>9 or 12 or 13 or 14 or 15 (21563)=I</b>                                                                                                                                                                                         |
| 17                                              | 8 and 16 (2229)                                                                                                                                                                                                                    |
| 18                                              | "Effect of one-year subcutaneous and sublingual immunotherapy on clinical and laboratory parameters in children with rhinitis and asthma: a randomized, placebo-controlled, double-blind, double-dummy study".fc_titl. (1)         |
| 19                                              | "A double-blind, placebo-controlled study of house dust mite immunotherapy in Chinese asthmatic patients".fc_titl. (1)                                                                                                             |
| 20                                              | "Effect of specific immunotherapy added to pharmacologic treatment and allergen avoidance in asthmatic patients allergic to house dust mite".fc_titl. (1)                                                                          |
| 21                                              | "abramson\$".fc_auts. and "Injection allergen immunotherapy for asthma".fc_titl. (1)                                                                                                                                               |
| 22                                              | "Efficacy of sublingual immunotherapy in asthma: systematic review of randomized-clinical trials using the Cochrane Collaboration method".fc_titl. (1)                                                                             |
| 23                                              | "Metaanalysis of the efficacy of sublingual immunotherapy in the treatment of allergic asthma in pediatric patients".fc_titl. (1)                                                                                                  |
| 24                                              | "Normansell\$".fc_auts. and "Sublingual immunotherapy for asthma".fc_titl. (1)                                                                                                                                                     |
| 25                                              | "Efficacy of sublingual immunotherapy in patients with rhinitis and asthma due to house dust mite. A double-blind study".fc_titl. (1)                                                                                              |
| 26                                              | "Double-blind, placebo-controlled evaluation of sublingual immunotherapy with standardized olive pollen extract in pediatric ".fc_titl. (1)                                                                                        |
| 27                                              | "Clinical and immunologic effects of long-term sublingual immunotherapy in asthmatic children sensitized to mites: a double-blind, placebo-controlled ".fc_titl. (1)                                                               |
| 28                                              | "Efficacy of sublingual immunotherapy with high-dose mite extracts in asthma: a multi-center, double-blind, randomized, and placebo-controlled study in Taiwan".fc_titl. (1)                                                       |
| 29                                              | "Immunomodulation during sublingual therapy in allergic children".fc_titl. (1)                                                                                                                                                     |
| 30                                              | "Preseasonal local allergoid immunotherapy to grass pollen in children: a double-blind, placebo-controlled, randomized trial".fc_titl. (1)                                                                                         |
| 31                                              | "Sublingual immunotherapy and influence on urinary leukotrienes in seasonal pediatric allergy".fc_titl. (1)                                                                                                                        |
| 32                                              | "A prospective, randomized, double-blind, placebo-controlled multi-centre study on the efficacy and safety of sublingual immunotherapy (SLIT) in children with seasonal allergic rhinoconjunctivitis to grass pollen".fc_titl. (2) |
| 33                                              | "Sublingual immunotherapy with allergenic extract of Dermatophagoides pteronyssinus in asthmatic children".fc_titl. (2)                                                                                                            |
| 34                                              | "Sublingual immunotherapy abrogates seasonal bronchial hyperresponsiveness in children with Parietaria-induced respiratory allergy: a randomized controlled trial. ".fc_titl. (1)                                                  |

|    |                                                                                                                                                                                            |
|----|--------------------------------------------------------------------------------------------------------------------------------------------------------------------------------------------|
| 1  |                                                                                                                                                                                            |
| 2  |                                                                                                                                                                                            |
| 3  |                                                                                                                                                                                            |
| 4  | 35 "Impact of sublingual immunotherapy on seasonal asthma and skin reactivity in children allergic to Parietaria pollen treated with ".fc_titl. (1)                                        |
| 5  | 36 "Double-blind placebo-controlled study of sublingual immunotherapy with house dust mite extract ".fc_titl. (1)                                                                          |
| 6  | 37 "Efficacy of sublingual immunotherapy in children with asthma and rhinitis: a double-blind, placebo-controlled study. ".fc_titl. (1)                                                    |
| 7  | 38 or/18-20 (3)                                                                                                                                                                            |
| 8  | 39 or/21-37 (19)                                                                                                                                                                           |
| 9  | 40 38 or 39 (22)                                                                                                                                                                           |
| 10 | 41 "controle refs slit scit".ti. (0)                                                                                                                                                       |
| 11 | 42 "filter systematic reviews & meta-analyses Embase".ti. (0)                                                                                                                              |
| 12 | 43 meta analysis/ (127495)                                                                                                                                                                 |
| 13 | 44 "systematic review"/ (139284)                                                                                                                                                           |
| 14 | 45 (meta-analy\$ or metaanaly\$).tw. (145912)                                                                                                                                              |
| 15 | 46 (systematic\$ adj4 (review\$ or overview\$)).tw. (139834)                                                                                                                               |
| 16 | 47 (quantitativ\$ adj5 (review? or overview?)).tw. (3786)                                                                                                                                  |
| 17 | 48 (methodologic adj5 (overview? or review?)).tw. (325)                                                                                                                                    |
| 18 | 49 (review\$ adj3 (database? or medline or embase or cinahl)).tw. (19428)                                                                                                                  |
| 19 | 50 (pooled adj3 analy\$).tw. (20108)                                                                                                                                                       |
| 20 | 51 (extensive adj3 review\$ adj3 literature).tw. (2903)                                                                                                                                    |
| 21 | 52 (meta or synthesis or (literature adj8 database?) or extraction).tw. (1197812)                                                                                                          |
| 22 | 53 review.pt. (2259303)                                                                                                                                                                    |
| 23 | 54 52 and 53 (112526)                                                                                                                                                                      |
| 24 | 55 (systematic\$ adj4 (review\$ or overview\$)).kw. (16750)                                                                                                                                |
| 25 | 56 (quantitativ\$ adj5 (review? or overview?)).kw. (48)                                                                                                                                    |
| 26 | 57 (pooled adj3 analy\$).kw. (354)                                                                                                                                                         |
| 27 | 58 or/43-51,54-57 (381419)                                                                                                                                                                 |
| 28 | 59 "filter rct embase".ti. (0)                                                                                                                                                             |
| 29 | 60 controlled clinical trial/ or randomized controlled trial/ (614267)                                                                                                                     |
| 30 | 61 randomization/ (73811)                                                                                                                                                                  |
| 31 | 62 Major Clinical Study/ (2803898)                                                                                                                                                         |
| 32 | 63 random\$.tw. (1196822)                                                                                                                                                                  |
| 33 | 64 Double Blind Procedure/ (139034)                                                                                                                                                        |
| 34 | 65 or/60-64 (3916117)                                                                                                                                                                      |
| 35 | 66 "einde filter rct embase".ti. (0)                                                                                                                                                       |
| 36 | 67 (child??? or childhood or infant* or p?ediatr* or perinat* or neonat* or newborn* or infan* or boy? or girl? or kid? or schoolage* or juvenil* or adolescen* or toddler?).tw. (2468214) |
| 37 | 68 child/ (1526632)                                                                                                                                                                        |
| 38 | 69 infant/ (566151)                                                                                                                                                                        |
| 39 | 70 adolescent/ (1414197)                                                                                                                                                                   |
| 40 | 71 or/67-70 (3656088)                                                                                                                                                                      |
| 41 | <b>72 17 and 58 and 71 (85) systrev</b>                                                                                                                                                    |
| 42 | 73 (17 and 65 and 71) not 58 (370) rct                                                                                                                                                     |
| 43 | 74 17 and 58 (208)                                                                                                                                                                         |
| 44 | 75 74 not 72 (123)                                                                                                                                                                         |
| 45 | 76 75 (123)                                                                                                                                                                                |
| 46 | 77 limit 76 to yr="2016 -Current" (14)                                                                                                                                                     |
| 47 | 78 76 (123)                                                                                                                                                                                |
| 48 | <b>79 limit 78 to yr="2015 -Current" (31) extra systrev</b>                                                                                                                                |
| 49 | <b>Search Cochrane 2017, June, 2<sup>nd</sup></b>                                                                                                                                          |
| 50 | #1 asthma*:ti,ab,kw 26843                                                                                                                                                                  |
| 51 | #2 MeSH descriptor: [Asthma] this term only 9761                                                                                                                                           |
| 52 | #3 MeSH descriptor: [Bronchial Spasm] explode all trees 360                                                                                                                                |
| 53 | #4 wheez*:ti,ab,kw 1642                                                                                                                                                                    |
| 54 | #5 bronchospas*:ti,ab,kw 1594                                                                                                                                                              |
| 55 | #6 (bronch* near/8 spas*):ti,ab,kw 460                                                                                                                                                     |
| 56 | #7 bronchoconstrict*:ti,ab,kw 2204                                                                                                                                                         |



|                                                   |                                                                                                                                                                                                |        |
|---------------------------------------------------|------------------------------------------------------------------------------------------------------------------------------------------------------------------------------------------------|--------|
| #8                                                | (bronch* near/8 constrict*):ti,ab,kw                                                                                                                                                           | 121    |
| #9                                                | (airway* near/1 inflammation*):ti,ab,kw                                                                                                                                                        | 1236   |
| #10                                               | #1 or #2 or #3 or #4 or #5 or #6 or #7 or #8 or #9                                                                                                                                             | 28980  |
| #11                                               | (perennial or seasonal or allergen* or hyposensiti*):ti,ab,kw                                                                                                                                  | 10214  |
| #12                                               | immunotherap*:ti,ab,kw                                                                                                                                                                         | 6399   |
| #13                                               | MeSH descriptor: [Immunotherapy] this term only                                                                                                                                                | 1140   |
| #14                                               | (SCIT or SLIT or (sublingual near/1 immunotherap*) or (subcutaneous near/1 immunotherap*)):ti,ab,kw                                                                                            | 2033   |
| #15                                               | #11 or #12 or #13 or #14                                                                                                                                                                       | 15912  |
| #16                                               | #10 and #15                                                                                                                                                                                    | 3351   |
| #17                                               | (child* or childhood or infant* or pediatr* or paediatric* or perinat* or neonat* or newborn* or infan* or boy* or girl* or kid* or schoolage* or juvenil* or adolescen* or toddler*):ti,ab,kw | 239918 |
| #18                                               | #16 and #17                                                                                                                                                                                    | 1570   |
| #19                                               | immunotherap*:ti,kw                                                                                                                                                                            | 5661   |
| #20                                               | subcutaneou*:ti,kw                                                                                                                                                                             | 12350  |
| #21                                               | (SCIT or SLIT or (sublingual near/1 immunotherap*) or (subcutaneous near/1 immunotherap*)):ti,kw                                                                                               | 1257   |
| #22                                               | #13 or #19 or #20 or #21                                                                                                                                                                       | 17830  |
| #23                                               | #18 and #22                                                                                                                                                                                    | 516    |
| #24                                               | (perennial or seasonal or allergen* or hypo-sensiti*):ti                                                                                                                                       | 5205   |
| #25                                               | #22 or #24                                                                                                                                                                                     | 22321  |
| #26                                               | #25 and #18                                                                                                                                                                                    | 927    |
| #27                                               | #16 and #22                                                                                                                                                                                    | 1071   |
| #28                                               | MeSH descriptor: [Injections, Subcutaneous] explode all trees                                                                                                                                  | 4017   |
| #29                                               | (#12 or #13) and (#20 or #28)                                                                                                                                                                  | 646    |
| #30                                               | #29 or #21 or #24                                                                                                                                                                              | 6616   |
| #31                                               | MeSH descriptor: [Desensitization, Immunologic] 2 tree(s) exploded                                                                                                                             | 872    |
| #32                                               | (#31 or #30) and #10                                                                                                                                                                           | 1961   |
| #33                                               | MeSH descriptor: [Child] explode all trees                                                                                                                                                     | 227    |
| #34                                               | MeSH descriptor: [Adolescent] explode all trees                                                                                                                                                | 90499  |
| #35                                               | MeSH descriptor: [Infant] explode all trees                                                                                                                                                    | 15066  |
| #36                                               | #17 or #33 or #34 or #35                                                                                                                                                                       | 239918 |
| #37                                               | #32 and #36                                                                                                                                                                                    | 816    |
| <b>Results</b>                                    |                                                                                                                                                                                                |        |
| Cochrane Databases of Systematic Reviews          |                                                                                                                                                                                                | 19     |
| Database of Abstracts of Reviews of Effectiveness |                                                                                                                                                                                                | 7      |
| Cochrane Central Trials Register                  |                                                                                                                                                                                                | 57     |
| emb20170602 scit slit systrev.                    |                                                                                                                                                                                                | 53     |
| emb20170602 scit slit extra vanaf2015systrev      |                                                                                                                                                                                                | 26     |
| med20170602 scit slit systrev.                    |                                                                                                                                                                                                | 89     |
| coc sr20170601 extra astma scit slit.             |                                                                                                                                                                                                | 4      |
| coc dare20170602                                  |                                                                                                                                                                                                | 5      |

Table E2. Evidence table systematic reviews (SCIT + SLIT)

|                                    | Abramson, 2010 <sup>16</sup>                                                                                                                                                                                                                 | Calamita, 2006 <sup>29</sup>                                                                                                                                                                         | Penagos, 2008 <sup>32</sup>                                                                                                                                                                                                                                                           |
|------------------------------------|----------------------------------------------------------------------------------------------------------------------------------------------------------------------------------------------------------------------------------------------|------------------------------------------------------------------------------------------------------------------------------------------------------------------------------------------------------|---------------------------------------------------------------------------------------------------------------------------------------------------------------------------------------------------------------------------------------------------------------------------------------|
| <b>Study design</b>                | Cochrane systematic review, consisting of 90 RCT's. 14 RCT's were carried out in children only; 24 were done in children and adults. The total study population (children and adults) consisted of 3.792 patients (of whom 3.459 had asthma) | Systematic review, consisting of 25 RCT's. Only 9 RCT's were carried out in children only. The total study population consisted of 1.706 patients (adults and children, with asthma and/or rhinitis) | Systematic review, consisting of 9 RCT's, all carried out in children. The total study population comprised 441 patients with asthma (seasonal, mild, moderate, and persistent)                                                                                                       |
| <b>Age (mean)</b>                  | Not specified, variation between included studies                                                                                                                                                                                            | Not specified, there is a limited description of the characteristics of the included studies                                                                                                         | Range specified per study, total range: 4-17 years                                                                                                                                                                                                                                    |
| <b>Setting (in RCT's)</b>          | -                                                                                                                                                                                                                                            | -                                                                                                                                                                                                    | -                                                                                                                                                                                                                                                                                     |
| <b>Diagnosis (asthma/rhinitis)</b> | Asthma                                                                                                                                                                                                                                       | Asthma and rhinitis                                                                                                                                                                                  | Asthma                                                                                                                                                                                                                                                                                |
| <b>Eligibility criteria</b>        | RCT's, patients with asthma, allergen specific subcutaneous immunotherapy (administration of extracts of house dust mites, pollens, animal danders or molds, chemically modified allergoids or antigen-antibody complexes)                   | RCT's, double blinded, and open studies, patients with asthma and/or rhinitis, sublingual immunotherapy (with or without swallowing, all types of allergen, all doses, all lengths of treatment)     | RCT's, double blinded, placebo controlled, patients ≤ 18 years, with a history of allergic asthma, with identified causal allergen, and proven IgE sensitization. Sublingual immunotherapy (with or without swallowing, all types of allergen, all doses, all durations of treatment) |
| <b>Type of immunotherapy</b>       | Subcutaneous immunotherapy (variation of allergen abstracts in different included studies)                                                                                                                                                   | Sublingual immunotherapy, mainly pollen and mite                                                                                                                                                     | Sublingual immunotherapy, mainly mites                                                                                                                                                                                                                                                |
| <b>Intervention</b>                | Subcutaneous immunotherapy                                                                                                                                                                                                                   | Sublingual immunotherapy, mainly pollen and mite                                                                                                                                                     | Sublingual immunotherapy (mainly mites, further: O europaea, Holcus, P pretense <i>Dermatophagoides pteronyssinus</i> , grass mix), great variation in duration, range: 3-32 months                                                                                                   |
| <b>Control</b>                     | Placebo                                                                                                                                                                                                                                      | Placebo                                                                                                                                                                                              | Placebo                                                                                                                                                                                                                                                                               |
| <b>Primary outcomes</b>            | Asthmatic symptoms<br>Asthma medication requirements<br>Lung function<br>Nonspecific bronchial hyper-reactivity<br>Allergen specific bronchial hyper-reactivity                                                                              | Asthmatic symptoms (symptom score)<br>Asthmatic medication requirement<br>Respiratory function tests (PEFR, FEV <sub>1</sub> , FEF25-75%)<br>Nonspecific bronchial provocation<br>Adverse effects    | Asthma symptoms<br>Medication scores                                                                                                                                                                                                                                                  |
| <b>Secondary outcomes</b>          | Local reactions<br>Systemic reactions                                                                                                                                                                                                        | -                                                                                                                                                                                                    |                                                                                                                                                                                                                                                                                       |

|                |                                                                                                                     |                                                                   |   |
|----------------|---------------------------------------------------------------------------------------------------------------------|-------------------------------------------------------------------|---|
| <b>Comment</b> | The results have not been presented separately for children in the review. We conducted new suitable meta-analyses. | The authors mentioned they used the Cochrane Collaboration method | - |
|----------------|---------------------------------------------------------------------------------------------------------------------|-------------------------------------------------------------------|---|

Abbreviations: FEF25-75: maximum mid expiratory flow; FEV<sub>1</sub>: forced expiratory volume in 1 second; PEFr: peak expiratory flow rate; RCT: randomized controlled trial; SCIT: subcutaneous immunotherapy; SLIT: sublingual immunotherapy

For peer review only

1  
2  
3  
4  
5  
6  
7  
8  
9  
10  
11  
12  
13  
14  
15  
16  
17  
18  
19  
20  
21  
22  
23  
24  
25  
26  
27  
28  
29  
30  
31  
32  
33  
34  
35  
36  
37  
38  
39  
40  
41  
42  
43  
44  
45  
46  
47

Table E3. Evidence table SCIT studies

| Author, date                        | Study design                                                                                | Setting    | Eligibility | Participants (number, gender, age, and descriptive)                                                     | Asthma type,* severity (e.g. on ICS?)                                                     | Allergy type (mono/multi, allergens,                     | Intervention (type, dose, duration)                                                                                         | Control | Follow-up (from start | Outcomes                                                                                   | Results reported by author†                                                                  | Critical appraisal‡                                                                   | Comments                                                                                                     |
|-------------------------------------|---------------------------------------------------------------------------------------------|------------|-------------|---------------------------------------------------------------------------------------------------------|-------------------------------------------------------------------------------------------|----------------------------------------------------------|-----------------------------------------------------------------------------------------------------------------------------|---------|-----------------------|--------------------------------------------------------------------------------------------|----------------------------------------------------------------------------------------------|---------------------------------------------------------------------------------------|--------------------------------------------------------------------------------------------------------------|
| <b>Adkinson, 1997</b> <sup>45</sup> | Double blind, placebo controlled, parallel group RCT Placebo caramelized saline + histamine | ?          |             | 121 allergic children with perennial asthma Mean age 9.2 (range 5.4 to 14) years, 79% boys              | Perennial asthma 34% ICS, 13% systemic                                                    | 80% dust mite, 77% ragweed, 69% rye grass                | Subcutaneous multiple allergen immunotherapy Median 6 (range 2 to 7) allergen extracts                                      | Placebo | ?                     | Symptom scores Medication scores PEF rates Nonspecific BHR (methacholin FEV <sub>1</sub> ) | SCIT not useful in moderate to severe perennial allergic asthma                              | Study useful, however low rate of ICS                                                 | Allocation concealment unclear                                                                               |
| <b>Altintas, 1999</b> <sup>46</sup> | Open placebo controlled RCT multiple groups                                                 | university |             | 34 poorly controlled mild to moderate asthmatics aged 4 to 18 years; 30 patients in 3 groups, 5 placebo | ICS use not specified, no medical details on asthma                                       | Mono-sensitization <i>Dermatophagoides pteronyssinus</i> | Subcutaneous immunotherapy with adsorbed or aqueous <i>Dermatophagoides pteronyssinus</i> extracts (in different dilutions) | Placebo |                       | Symptom medication score IgE and IgG4 level Bronchial provocation tests                    | SCIT is useful and safe; no conclusion on asthma                                             | Study not useful No data on ICS,                                                      | Allocation concealment unclear Study designed to compare 3 different abstracts of immunotherapy              |
| <b>Dreborg, 1986</b> <sup>47</sup>  | RCT, double blind Freeze dried caramelized histamine placebo                                | European   |             | 30 children with <i>Cladosporium</i> allergy, aged 5 to 17 years                                        | Clinical history suggesting mold-induced asthma and/or rhinoconjunctivitis ICS not stated | <i>Cladosporium</i> allergy                              | 10 months <i>Cladosporium</i> subcutaneous immunotherapy Or placebo                                                         | Placebo |                       | Symptoms Medication PEF (no SD reported) Allergen specific BHR                             | Decrease in medication score, but not in symptom score Lower medication score in verum group | Study not useful No information on asthma medication No fixed study medication scheme | Allocation concealment unclear Asthma diagnosis not specified, (worsening of asthma in the <i>Cladospori</i> |

|                                                                               |                                      |                                                             |                                |                                                                                                                        |                                                      |  |                                                                                        |         |  |                                                                       |                                                                                                                                                               |                                                       |                                                                                                                              |
|-------------------------------------------------------------------------------|--------------------------------------|-------------------------------------------------------------|--------------------------------|------------------------------------------------------------------------------------------------------------------------|------------------------------------------------------|--|----------------------------------------------------------------------------------------|---------|--|-----------------------------------------------------------------------|---------------------------------------------------------------------------------------------------------------------------------------------------------------|-------------------------------------------------------|------------------------------------------------------------------------------------------------------------------------------|
|                                                                               |                                      |                                                             |                                |                                                                                                                        |                                                      |  |                                                                                        |         |  |                                                                       |                                                                                                                                                               | um season)                                            |                                                                                                                              |
| 1<br>2<br>3<br>4<br>5<br>6<br>7<br>8<br>9<br>10<br>11<br>12<br>13<br>14<br>15 | <b>Hill, 1982</b> <sup>48</sup>      | Single blind RCT, rye grass pollen placebo                  | University Australia           | 20 asthmatic children, aged 9 to 14 years, with rye grass pollen allergy, positive at bronchoprovocation               | ICS N=1 beclomethas on N=8 cromoglycate              |  | Subcutaneous immunotherapy with aqueous rye grass pollen extract                       | Placebo |  | Symptoms Medications (medians only reported, no SD)                   | no evidence that limited hyposensitization with a pollen extract is of any clinical benefit in seasonal asthma despite evidence of an immunological response. | Study not useful Primary outcome = IgE and IgG levels | No allocation concealment                                                                                                    |
| 16<br>17<br>18<br>19<br>20<br>21<br>22<br>23<br>24<br>25<br>26<br>27<br>28    | <b>Johnstone, 1961</b> <sup>49</sup> | RCT, double blind, 4-year follow up Buffered saline control | United States general hospital | 173 children with perennial asthma Severity = number of days of wheeze/year Placebo: n=41                              | No medication mentioned at all, no medication scores |  | Subcutaneous immunotherapy with relevant allergen extracts, administered by 3 regimens | Placebo |  | Asthma symptoms reported by mother Number of new allergies developing | Less new allergies developing Less symptoms and asthma attacks in the last year in the group 4                                                                | Study not useful No asthma medication scores          | Allocation concealment unclear 4 different groups, 1 placebo (n=41) Group 2-4 different strength SCIT Last year single blind |
| 29<br>30<br>31<br>32<br>33<br>34<br>35<br>36<br>37<br>38<br>39                | <b>Johnstone, 1968</b> <sup>50</sup> | RCT, double blind Buffered saline control                   |                                | 130 children with perennial asthma; Severity = number of days of wheeze/year RCT, double blind Buffered saline control | No medication mentioned, no medication scores        |  | Subcutaneous immunotherapy with relevant allergens administered by 3 regimens          | Placebo |  | Asthma symptoms reported by mother                                    | More children in SCIT group high dose overgrowing asthma at the age of 16 than placebo                                                                        | Study not useful No asthma medication scores          | Allocation concealment unclear 14-years follow up of Johnstone 1961                                                          |
| 40<br>41<br>42<br>43<br>44                                                    | <b>Price, 1984</b> <sup>51</sup>     | RCT, double blind                                           |                                | 25 children with perennial asthma, aged 5 to 15 years                                                                  | Asthma severity not specified asthma                 |  | Subcutaneous immunotherapy with <i>Dermatophag</i>                                     | Placebo |  | Symptoms Medication Lung function Bronchoprovocation                  | Loss of late reaction on bronchoprovocation Only one out of 6                                                                                                 | Study not useful Bronchoprovocation is                | Continuation of study by Warner 1978 for second                                                                              |

|                                      |                                                     |                             |                                                                                                                                          |                                                                                            |                                                             |                                                                                                                                                                                                                                                                                                                                                    |                 |                           |                                                                                                                                              |                                                                                                                                                                                                                                                                                                                                                                                               |                                                                   |                                                                        |
|--------------------------------------|-----------------------------------------------------|-----------------------------|------------------------------------------------------------------------------------------------------------------------------------------|--------------------------------------------------------------------------------------------|-------------------------------------------------------------|----------------------------------------------------------------------------------------------------------------------------------------------------------------------------------------------------------------------------------------------------------------------------------------------------------------------------------------------------|-----------------|---------------------------|----------------------------------------------------------------------------------------------------------------------------------------------|-----------------------------------------------------------------------------------------------------------------------------------------------------------------------------------------------------------------------------------------------------------------------------------------------------------------------------------------------------------------------------------------------|-------------------------------------------------------------------|------------------------------------------------------------------------|
|                                      | Saline placebo control                              |                             |                                                                                                                                          | medication not specified                                                                   |                                                             | <i>oides pteronyssinus</i> extracts                                                                                                                                                                                                                                                                                                                |                 |                           |                                                                                                                                              | children with severe asthma improved                                                                                                                                                                                                                                                                                                                                                          | surrogate outcome;                                                | year with placebo group crossed over to active immunotherapy           |
| <b>Tsai, 2010</b> <sup>34</sup>      | RCT, no blinding, no intervention in control group  | University hospital, Taiwan | 40 children (21 boys), aged 5-14 years (average 8,5) >1 year moderate persistent to severe asthma, all monosensitized to house dust mite | Moderate persistent to severe asthma, using daily medication, most patient at least on ICS | House dust mite, diagnosed by SPT or specific antibody test | Subcutaneous injections of extracts of <i>Dermatophagoides pteronyssinus</i> and <i>Dermatophagoides farina</i> (10000 AU/ml), initial dose 0,5AU/ml once a week. Dosage was increased weekly by 25-100% to reach optimal maintenance dose, with respect to local or systemic reaction. Maintenance therapy every 2 weeks during at least 3 months | No intervention | 6 months (last follow-up) | Primary: Medication score (5 point scale, modified GINA) Secondary: PEF, asthma symptom score, number of contacts with health care providers | Mean medication score declined after 6 months in both groups; no significant differences between group differences. Both groups had reduction of asthma symptoms after 6 months, but no between group differences. There was no difference in PEF. Patients in the intervention group had more clinical visits than the control group, but no difference in emergency room or hospitalization | Very few patients, no blinding, randomization procedure not clear |                                                                        |
| <b>Valovirta, 1984</b> <sup>52</sup> | RCT, double blind Caramel histamine placebo control | ?                           | 27 asthmatic children allergic to dog dander, aged 5 to 18 years                                                                         | Asthma severity not specified asthma medication not specified                              |                                                             | Subcutaneous immunotherapy with aluminium hydroxide bound dog                                                                                                                                                                                                                                                                                      | Placebo         |                           | Symptoms Allergen specific BHR                                                                                                               | The decrease in bronchial sensitivity was less marked than that in conjunctival sensitivity and                                                                                                                                                                                                                                                                                               | Study not useful No asthma medication scores                      | Primary outcome dog dander sensitivity, not asthma 2 authors connected |

|                                                                                                                                                    |                                   |                                            |                            |                                                                                                                                                     |                                       |                                                      |                                                                                                                                                                                                                                                                                        |                                                     |         |                                                                                                                                                                       |                                                                                                                                                                                    |                                                                                                                   |                                                           |
|----------------------------------------------------------------------------------------------------------------------------------------------------|-----------------------------------|--------------------------------------------|----------------------------|-----------------------------------------------------------------------------------------------------------------------------------------------------|---------------------------------------|------------------------------------------------------|----------------------------------------------------------------------------------------------------------------------------------------------------------------------------------------------------------------------------------------------------------------------------------------|-----------------------------------------------------|---------|-----------------------------------------------------------------------------------------------------------------------------------------------------------------------|------------------------------------------------------------------------------------------------------------------------------------------------------------------------------------|-------------------------------------------------------------------------------------------------------------------|-----------------------------------------------------------|
|                                                                                                                                                    |                                   |                                            |                            |                                                                                                                                                     |                                       | danger extract                                       |                                                                                                                                                                                                                                                                                        |                                                     |         | statistically not significant                                                                                                                                         |                                                                                                                                                                                    | to pharmaceutical company                                                                                         |                                                           |
| 1<br>2<br>3<br>4<br>5<br>6<br>7<br>8<br>9<br>10<br>11<br>12<br>13                                                                                  | <b>Warner, 1978</b> <sup>53</sup> | RCT, double blind Tyrosine placebo control | University, United Kingdom | 51 asthmatic children, aged 5 to 14 years, with positive <i>Dermatophagoides pteronyssinus</i> challenge                                            | ICS n=12, cromoglycate n=24 SABA n=14 | House dust mite, SPT and bronchoprovocation positive | Subcutaneous immunotherapy with tyrosine adsorbed <i>Dermatophagoides pteronyssinus</i> extracts                                                                                                                                                                                       | Placebo                                             | 1 year  | Symptoms Medication Lung function (PEF, FEV 0.75) Allergen specific BHR                                                                                               | Less asthma medication in active group, but no difference in control or immediate response on bronchoprovocation                                                                   | Useful; however incomparable low level of ICS                                                                     | Allocation concealment unclear No fixed medication scheme |
| 14<br>15<br>16<br>17<br>18<br>19<br>20<br>21<br>22<br>23<br>24<br>25<br>26<br>27<br>28<br>29<br>30<br>31<br>32<br>33<br>34<br>35<br>36<br>37<br>38 | <b>Zielen, 2010</b> <sup>55</sup> | RCT, single blind, no control intervention | Multinational, multicenter | 56 children with asthma GINA treatment II-III, on ICS, house dust mite (positive SPT), positive conjunctival provocation, significant RAST response | All on ICS, GINA II-III treatment     | House dust mite SPT, provocative                     | SCIT with allergens extracted from <i>Dermatophagoides pteronyssinus</i> in 2 strengths: A: 1000 TU/ml; B: 10000 TU/ml. Initial therapy: weekly increasing doses strength A, followed by B. After reaching max individually tolerated dose, dosage intervals were increased to 6 weeks | No immunotherapy, only maintenance therapy with ICS | 2 years | Primary: change in ICS dose steps to achieve asthma control Secondary: change in pre-bronchodilator y PEF, immunologic changes, nonspecific bronchial hyperreactivity | Less asthma medication in SCIT group as compared to control group, no change in asthma control, higher increase in PEF in intervention group. Adverse events in 97% in both groups | Block randomization. Multicenter, multinational is possible bicenter, binational. Conflict of interest in authors |                                                           |

Abbreviations: AU: dosing units; BHR: bronchohyperreactivity; FEV1: forced expiratory volume in 1 second; GINA: Global Initiative for Asthma; ICS: inhaled corticosteroids; ml: millilitres; n: number; PEF: peak expiratory flow; RAST: radioallergent sorbent test; RCT: randomized controlled trial; SABA: short-acting beta agonist; SCIT: subcutaneous immunotherapy; SD: standard deviation; SPT: skin prick test; TU: dosing units

\* Doctors diagnosed asthma? Stable/seasonal asthma? Mild/severe asthma?

† Asthma symptoms, allergy/rhinitis symptoms, asthma control, (disease specific) quality of life, exacerbations, lung function, adverse reactions and/or complications

‡ e.g. randomization procedure, blinding, risk of bias



Table E4. Evidence table selected RCT's in children included in systematic reviews Calamita et al., Penagos et al. and Pham-Thi et al. (SLIT)

| Author, date                         | Study design                                   | Setting                                  | Eligibility criteria                                                                                                                                   | Participants (number, gender, age, and Asthma type*, severity (e.g. on ICS?) | Allergy type (mono/multi, allergens, proven)                                                            | Intervention (type, dose, duration)                              | Control                                                                                            | Follow-up (from start trial) | Outcomes  | Results†                                                                                                               | Critical appraisal‡                                                                                                              | Comments                                                                                                                                                       |                                                                                                                    |
|--------------------------------------|------------------------------------------------|------------------------------------------|--------------------------------------------------------------------------------------------------------------------------------------------------------|------------------------------------------------------------------------------|---------------------------------------------------------------------------------------------------------|------------------------------------------------------------------|----------------------------------------------------------------------------------------------------|------------------------------|-----------|------------------------------------------------------------------------------------------------------------------------|----------------------------------------------------------------------------------------------------------------------------------|----------------------------------------------------------------------------------------------------------------------------------------------------------------|--------------------------------------------------------------------------------------------------------------------|
| <b>Bahceciler 2001</b> <sup>54</sup> | double-blind placebo-controlled SLIT drops HDM | Mono-center Turkey University hospital   | Asthma with need for ICS, HDM allergic, ongoing respiratory symptoms despite mite avoidance and appropriate ICS treatment, > 7 years, FEV <sub>1</sub> | 15, 8 male, 11,7 years                                                       | Moderate asthma, need for ICS, respectively symptoms despite mite avoidance, FEV <sub>1</sub> > 70%     | Mono-allergy HDM but negative for all other aeroallergens        | Drops SLIT, dose 100 IR/day, 4 weeks run-in, 4 weeks once daily, thereafter 2/week; total 6 months | Placebo drops                | 6 months  | Symptom scores, compliance, SPT 6 months, Lung function, metacholine, serum IgE                                        | Improvement asthma score. Less use of SABA, trend towards less ICS (not significant), no change in PD20, no serious side effects | Randomization and blinding not clear, possible industrial influence, disclosures not stated, small number of patients, no follow-up after stop of intervention | Season not stated; decrease PEF in placebo group – stable in intervention group                                    |
| <b>Hirsch 1997</b> <sup>55</sup>     | double-blind placebo-controlled SLIT drops HDM | Mono-center, university hospital Germany | Not strictly specified                                                                                                                                 | 30, female n=10, 10,5 years (6-15 years)                                     | 'mild to moderate asthma': n=8; allergic rhinitis: n=8; asthma and rhinitis: n=14 Not further specified | Allergy SPT positive HDM, part also sensitized cat, dog, grasses | Drops SLIT HDM, 3 weeks run-in, maintenance 7 drops 3 days/week; total 12 months                   | Placebo drops (vehicle only) | 12 months | Symptom scores, compliance, SPT 6 months, Lung function, metacholine, serum IgE, collection of dust samples (exposure) | Less pulmonary symptoms No difference use of SABA No change in PD20 No serious side effects                                      | Small number of patients, especially when specified per group. Enrollment of patients (possible selection bias) is not clear. Serious differences in patients  | Season not stated; Asthma group not well-described, exacerbations not described, 8 patients allergic rhinitis only |



| Author, date                    | Study design                                                 | Setting            | Eligibility criteria                                                                                                                                                                                           | Participants (number, gender, age, and Asthma type*, severity (e.g. on ICS?) | Allergy type (mono/multi, allergens, proven)                                                             | Intervention (type, dose, duration)                             | Control                                                                           | Follow-up (from start trial) | Outcomes                                                                            | Results†                                                    | Critical appraisal‡                                                                                                                                                     | Comments                                                                                 |
|---------------------------------|--------------------------------------------------------------|--------------------|----------------------------------------------------------------------------------------------------------------------------------------------------------------------------------------------------------------|------------------------------------------------------------------------------|----------------------------------------------------------------------------------------------------------|-----------------------------------------------------------------|-----------------------------------------------------------------------------------|------------------------------|-------------------------------------------------------------------------------------|-------------------------------------------------------------|-------------------------------------------------------------------------------------------------------------------------------------------------------------------------|------------------------------------------------------------------------------------------|
|                                 |                                                              |                    |                                                                                                                                                                                                                |                                                                              |                                                                                                          |                                                                 |                                                                                   |                              |                                                                                     |                                                             | groups, otherwise than intervention (type and duration of disease), no follow-up after intervention. 20% drop-out in intervention group, no intention-to-treat analysis |                                                                                          |
| <b>Pajno 2003</b> <sup>57</sup> | double-blind placebo-controlled SLIT drops <i>Parietaria</i> | Mono-center, Italy | Inclusion: seasonal asthma and rhinoconjunctivitis, DDA, poor symptom control despite antihistamine, ICS and nedocromil use during pollen season, positive skin prick test <i>Parietaria</i> , Specific IgE to | 38, 20 female, 11 years,                                                     | DDA, seasonal asthma, poor control despite medication, including ICS, patients with PD20<2.0 mg excluded | Mono sensitization to <i>Parietaria</i> , SPT and RAST positive | Placebo drops + fluticasone 2 <sup>nd</sup> control group: no protocol medication | 12 months                    | Symptom scores, VAS score during pollen season, compliance, SPT 6 months, serum IgE | No difference in symptom scores<br>Better VAS in SLIT group | Patient selection not clear: 30/38 children were randomized; 8 were control (not willing to participate in trial?), possible selection bias                             | Unclear whether fluticasone was given intranasally or orally<br>No lung function or PD20 |

| Author, date                                  | Study design                                                 | Setting                                   | Eligibility criteria                                                                                                                              | Participants (number, gender, age, and Asthma type*, severity (e.g. on ICS?) | Allergy type (mono/multi, allergens, proven) | Intervention (type, dose, duration)                             | Control                                                                                                                                                                 | Follow-up (from start trial) | Outcomes  | Result†                                                                                               | Critical appraisal‡                                                                                     | Comments                                                     |                                                                                                           |
|-----------------------------------------------|--------------------------------------------------------------|-------------------------------------------|---------------------------------------------------------------------------------------------------------------------------------------------------|------------------------------------------------------------------------------|----------------------------------------------|-----------------------------------------------------------------|-------------------------------------------------------------------------------------------------------------------------------------------------------------------------|------------------------------|-----------|-------------------------------------------------------------------------------------------------------|---------------------------------------------------------------------------------------------------------|--------------------------------------------------------------|-----------------------------------------------------------------------------------------------------------|
|                                               |                                                              |                                           | <i>Parietaria</i> .<br>Exclusion: sensitization to other allergens, previous immunotherapy, severe asthma (FEV <sub>1</sub> <70%), other diseases |                                                                              |                                              |                                                                 |                                                                                                                                                                         |                              |           |                                                                                                       |                                                                                                         |                                                              |                                                                                                           |
| <b>Pajno 2004</b> <sup># 58</sup>             | double-blind placebo-controlled SLIT drops <i>Parietaria</i> | Mono-center, Italy                        | seasonal asthma during spring and allergic rhinitis                                                                                               | 30 (8-14 years)                                                              | DDA                                          | Mono sensitization to <i>Parietaria</i> , SPT and RAST positive | Drops SLIT <i>Parietaria</i> , 4 weeks run-in, maintenance every other day, total 12 months                                                                             | Placebo drops                | 24 months | Lung function and PD20                                                                                | No change in lung function, improvement in BHR (PD20) after 2 years                                     | 1 author affiliated to pharmaceutical industry               |                                                                                                           |
| <b>Rolnick-Werninghaus 2004</b> <sup>60</sup> | double-blind placebo-controlled SLIT drops grass-pollen      | Multi-center, university clinics, Germany | Allergic rhinitis with or without seasonal asthma<br>Exclusion criteria: perennial asthma, ICS use                                                | Total 97 (32 female), 3-14 years<br>Asthma: n=39                             | DDA, seasonal asthma, no ICS use             | Grasspollen IgE and SPT positive<br>Others not mentioned        | Drops SLIT 5-grass mixture, 4 week run-in, 3 doses/week, total 32 months<br>1000 STU were equivalent to 25 BU and contained 2.5 µg of major grass pollen allergens. The | Placebo drops                | 32 months | Primary end-point: multiple symptom-medication score, lung function, FeNO (part of the participants), | Less use of combined medication (asthma medication not analyzed separately). Lung function inconclusive | 2 <sup>nd</sup> author affiliated to pharmaceutical industry | "this is not my patient" (perennial asthma excluded); lung function only analyzed as absolute values (not |

| Author, date                | Study design                                   | Setting             | Eligibility criteria                                                                                                                                      | Participants (number, gender, age, and Asthma type*, severity (e.g. on ICS?) | Allergy type (mono/multi, allergens, proven) | Intervention (type, dose, duration)                                                                                                                                                                                          | Control       | Follow-up (from start trial) | Outcomes                                                                     | Results†                                                                                             | Critical appraisal‡                                                                                                    | Comments     |
|-----------------------------|------------------------------------------------|---------------------|-----------------------------------------------------------------------------------------------------------------------------------------------------------|------------------------------------------------------------------------------|----------------------------------------------|------------------------------------------------------------------------------------------------------------------------------------------------------------------------------------------------------------------------------|---------------|------------------------------|------------------------------------------------------------------------------|------------------------------------------------------------------------------------------------------|------------------------------------------------------------------------------------------------------------------------|--------------|
|                             |                                                |                     |                                                                                                                                                           |                                                                              |                                              | monthly dose during maintenance treatment was 6 µg (0.5 µg/dose, 3 times/week). The median for the total duration of treatment was 32 months (January 1999 to November 2001) with a median cumulated dose of 188 µg allergen |               |                              | complications                                                                | ve; No change in FeNO<br>1 patient asthma exacerbation related to SLIT                               |                                                                                                                        | % predicted) |
| Ippoliti 2003 <sup>63</sup> | double-blind placebo-controlled SLIT drops HDM | Monocenter, Italy   | Mild/moderate asthma with or without rhinoconjunctivitis, FEV <sub>1</sub> > 70% predicted, mono-allergy HDM<br>Exclusion: other allergies, severe asthma | 86 (5-12 years); 35 female                                                   | Mild/moderate asthma, no seasonal asthma     | Mono HDM Drops SLIT <i>Dermatophagoides pteronyssinus</i> 1 + 2, 3 doses/week, 6 months                                                                                                                                      | Placebo drops | 6 months                     | Symptoms (unexplained scale), FEV <sub>1</sub> , serum parameters, tolerance | Symptom scale not explained FEV <sub>1</sub> ; SLIT: 83,4% → 92,6%; placebo: 80,7% → 81,2% (no test) | Poor description of methods (randomization, blinding, drop-out, outcome assessment, and results), selected population? |              |
| Niu 2006 <sup>64</sup>      | double-blind placebo                           | Multicenter, Taiwan | 6-12 years, mild/moderate asthma, mono-                                                                                                                   | 110; 97 in follow-                                                           | Mild/moderate asthma                         | Mono HDM Drops SLIT <i>Dermatophagoides</i>                                                                                                                                                                                  | Placebo drops | 30 weeks                     | Symptom scores, medication                                                   | Symptoms FEV <sub>1</sub> : no numeric                                                               | Poor description of                                                                                                    |              |

| Author, date                    | Study design                                     | Setting            | Eligibility criteria                                                                                                                           | Participants (number, gender, age, and Asthma type*, severity (e.g. on ICS?) | Allergy type (mono/multi, allergens, proven)            | Intervention (type, dose, duration)                                                                                                                | Control         | Follow-up (from start trial) | Outcomes                                                                                                          | Result†                                                                                                                     | Critical appraisal‡                                                         | Comments |
|---------------------------------|--------------------------------------------------|--------------------|------------------------------------------------------------------------------------------------------------------------------------------------|------------------------------------------------------------------------------|---------------------------------------------------------|----------------------------------------------------------------------------------------------------------------------------------------------------|-----------------|------------------------------|-------------------------------------------------------------------------------------------------------------------|-----------------------------------------------------------------------------------------------------------------------------|-----------------------------------------------------------------------------|----------|
|                                 | - controlled SLIT drops HDM                      |                    | allergy HDM, FEV <sub>1</sub> > 70%.<br>Exclusion: other allergies, severe asthma                                                              | up (39 female)                                                               |                                                         | <i>pteronysinus</i> + <i>Dermatophagoides farinae</i> , 4 weeks pretreatment, 3 weeks inductions, 21 weeks treatment, 2 weeks evaluation follow-up |                 |                              | scores, lung function, skin prick test, serum IgE, global assessment, safety                                      | data described                                                                                                              | randomization and blinding procedure, poor outcome reports                  |          |
| <b>Pajno 2000</b> <sup>65</sup> | double-blind placebo-controlled SLIT drops HDM   | Monocenter Italy   | Mild/moderate asthma, mono-allergy HDM<br>Exclusion: other allergies, severe asthma                                                            | 24 (8-15 years); 11 female                                                   | Mild/moderate asthma                                    | Mono HDM<br>Drops SLIT <i>Dermatophagoides pteronyssinus</i> 1 + 2, maintenance 3 doses/week, 3 years                                              | Placebo         | 3 years                      | Symptoms, medication use, asthma episodes, laboratory tests, side effects                                         | Only nighttime symptoms reported                                                                                            | Few children, methodological failure on drop-outs, selective outcome report |          |
| <b>Pham-Thi</b> <sup>44</sup>   | Double-blind placebo-controlled SLIT tablets HDM | Monocenter, France | Asthma, treated with inhaled corticosteroids, reversible bronchial obstruction, sensitized to HDM<br>Exclusion: sensitization to perennial and | 109 (5-16 years); 31 female                                                  | Mild asthma: 73<br>Moderate asthma: 36<br>All using ICS | Mono HDM<br>Tablets <i>Dermatophagoides pteronyssinus</i> + <i>Dermatophagoides farinae</i> , 2 weeks up dosing, then maintenance 17,5 months      | Placebo tablets | 18 months                    | Asthma symptom score, asthma-free days, asthma medication score, lung function, quality of life, rhinitis scores, | No significant differences between SLIT and placebo in symptoms and FEV <sub>1</sub> .<br>Quality of life: in children 6-11 | Poor description of blinding                                                |          |

| Author, date | Study design | Setting | Eligibility criteria                       | Participants (number, gender, age, and Asthma type*, severity (e.g. on ICS?)) | Allergy type (mono/multi, allergens, proven) | Intervention (type, dose, duration) | Control | Follow-up (from start trial) | Outcomes                     | Result†                                                                                                                                                         | Critical appraisal‡ | Comments |
|--------------|--------------|---------|--------------------------------------------|-------------------------------------------------------------------------------|----------------------------------------------|-------------------------------------|---------|------------------------------|------------------------------|-----------------------------------------------------------------------------------------------------------------------------------------------------------------|---------------------|----------|
|              |              |         | seasonal allergens, previous immunotherapy |                                                                               |                                              |                                     |         |                              | skin-prick tests, antibodies | significant difference on severity domain, clinical relevance not stated. Other domains, and older children: no significant difference between SLIT and placebo |                     |          |

Abbreviations: µg: micrograms; BHR: bronchial hyperreactivity; BU: biological units; DDA: doctor diagnosed asthma; FeNO: fraction nitric oxide in exhaled air; FEV<sub>1</sub>: forced expiratory volume in 1 second; HDM: house dust mite; ICS: inhaled corticosteroids; IR: index units of reactivity; n: number; PD20: concentration (metacholin/histamine) that causes a 20% fall in FEV<sub>1</sub>; PEF: peak expiratory flow; RAST: radioallergent sorbent test; RCT: randomized controlled trial; SABA: short-acting beta agonists; SLIT: sublingual immunotherapy; SPT: skin prick test; STU: specific treatment units; VAS: visual analogue scale

\* Doctors diagnosed asthma? Stable/seasonal asthma? Mild/severe asthma?

† Asthma symptoms, allergy/rhinitis symptoms, asthma control, (disease specific) quality of life, exacerbations, lung function, adverse reactions and/or complications

‡ e.g. randomization procedure, blinding, risk of bias

\*\* defined as an abrupt and/or progressive worsening of symptoms of shortness of breath, chest tightness, or some combination of these symptoms, which did not respond to regular use of beta-2-agonists for a duration of 24 hours

# is long term follow-up of Pajno 2003



# PRISMA 2009 Checklist

| Section/topic                      | #  | Checklist item                                                                                                                                                                                                                                                                                              | Reported on page # |
|------------------------------------|----|-------------------------------------------------------------------------------------------------------------------------------------------------------------------------------------------------------------------------------------------------------------------------------------------------------------|--------------------|
| <b>TITLE</b>                       |    |                                                                                                                                                                                                                                                                                                             |                    |
| Title                              | 1  | Identify the report as a systematic review, meta-analysis, or both.                                                                                                                                                                                                                                         | 1                  |
| <b>ABSTRACT</b>                    |    |                                                                                                                                                                                                                                                                                                             |                    |
| Structured summary                 | 2  | Provide a structured summary including, as applicable: background; objectives; data sources; study eligibility criteria, participants, and interventions; study appraisal and synthesis methods; results; limitations; conclusions and implications of key findings; systematic review registration number. | 5                  |
| <b>INTRODUCTION</b>                |    |                                                                                                                                                                                                                                                                                                             |                    |
| Rationale                          | 3  | Describe the rationale for the review in the context of what is already known.                                                                                                                                                                                                                              | 8                  |
| Objectives                         | 4  | Provide an explicit statement of questions being addressed with reference to participants, interventions, comparisons, outcomes, and study design (PICOS).                                                                                                                                                  | 8                  |
| <b>METHODS</b>                     |    |                                                                                                                                                                                                                                                                                                             |                    |
| Protocol and registration          | 5  | Indicate if a review protocol exists, if and where it can be accessed (e.g., Web address), and, if available, provide registration information including registration number.                                                                                                                               | n.a.               |
| Eligibility criteria               | 6  | Specify study characteristics (e.g., PICOS, length of follow-up) and report characteristics (e.g., years considered, language, publication status) used as criteria for eligibility, giving rationale.                                                                                                      | 9                  |
| Information sources                | 7  | Describe all information sources (e.g., databases with dates of coverage, contact with study authors to identify additional studies) in the search and date last searched.                                                                                                                                  | 19                 |
| Search                             | 8  | Present full electronic search strategy for at least one database, including any limits used, such that it could be repeated.                                                                                                                                                                               | Table E1           |
| Study selection                    | 9  | State the process for selecting studies (i.e., screening, eligibility, included in systematic review, and, if applicable, included in the meta-analysis).                                                                                                                                                   | 10; table E2       |
| Data collection process            | 10 | Describe method of data extraction from reports (e.g., piloted forms, independently, in duplicate) and any processes for obtaining and confirming data from investigators.                                                                                                                                  | 10 (fig 1)         |
| Data items                         | 11 | List and define all variables for which data were sought (e.g., PICOS, funding sources) and any assumptions and simplifications made.                                                                                                                                                                       | 10                 |
| Risk of bias in individual studies | 12 | Describe methods used for assessing risk of bias of individual studies (including specification of whether this was done at the study or outcome level), and how this information is to be used in any data synthesis.                                                                                      | 10                 |
| Summary measures                   | 13 | State the principal summary measures (e.g., risk ratio, difference in means).                                                                                                                                                                                                                               | Table 1            |
| Synthesis of results               | 14 | Describe the methods of handling data and combining results of studies, if done, including measures of consistency (e.g., $I^2$ for each meta-analysis. <a href="http://bmjopen.bmj.com/site/about/guidelines.xhtml">http://bmjopen.bmj.com/site/about/guidelines.xhtml</a> )                               | 10                 |

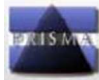

# PRISMA 2009 Checklist

1  
2  
3  
4  
5  
6  
7  
8  
9  
10  
11  
12  
13  
14  
15  
16  
17  
18  
19  
20  
21  
22  
23  
24  
25  
26  
27  
28  
29  
30  
31  
32  
33  
34  
35  
36  
37  
38  
39  
40  
41  
42  
43  
44  
45  
46  
47  
48  
49

| Section/topic                 | #  | Checklist item                                                                                                                                                                                           | Reported on page #          |
|-------------------------------|----|----------------------------------------------------------------------------------------------------------------------------------------------------------------------------------------------------------|-----------------------------|
| Risk of bias across studies   | 15 | Specify any assessment of risk of bias that may affect the cumulative evidence (e.g., publication bias, selective reporting within studies).                                                             | 10                          |
| Additional analyses           | 16 | Describe methods of additional analyses (e.g., sensitivity or subgroup analyses, meta-regression), if done, indicating which were pre-specified.                                                         | 10                          |
| <b>RESULTS</b>                |    |                                                                                                                                                                                                          |                             |
| Study selection               | 17 | Give numbers of studies screened, assessed for eligibility, and included in the review, with reasons for exclusions at each stage, ideally with a flow diagram.                                          | 12 + fig 1                  |
| Study characteristics         | 18 | For each study, present characteristics for which data were extracted (e.g., study size, PICOS, follow-up period) and provide the citations.                                                             | Table E2, E3, E4            |
| Risk of bias within studies   | 19 | Present data on risk of bias of each study and, if available, any outcome level assessment (see item 12).                                                                                                | Table 2, , table E2, E3, E4 |
| Results of individual studies | 20 | For all outcomes considered (benefits or harms), present, for each study: (a) simple summary data for each intervention group (b) effect estimates and confidence intervals, ideally with a forest plot. | Fig 2, 3; Table E2, E3, E4  |
| Synthesis of results          | 21 | Present results of each meta-analysis done, including confidence intervals and measures of consistency.                                                                                                  | 12 -15; Fig 2, 3            |
| Risk of bias across studies   | 22 | Present results of any assessment of risk of bias across studies (see Item 15).                                                                                                                          | Table 3                     |
| Additional analysis           | 23 | Give results of additional analyses, if done (e.g., sensitivity or subgroup analyses, meta-regression [see Item 16]).                                                                                    | n.a.                        |
| <b>DISCUSSION</b>             |    |                                                                                                                                                                                                          |                             |
| Summary of evidence           | 24 | Summarize the main findings including the strength of evidence for each main outcome; consider their relevance to key groups (e.g., healthcare providers, users, and policy makers).                     | 16                          |
| Limitations                   | 25 | Discuss limitations at study and outcome level (e.g., risk of bias), and at review-level (e.g., incomplete retrieval of identified research, reporting bias).                                            | 16-17                       |
| Conclusions                   | 26 | Provide a general interpretation of the results in the context of other evidence, and implications for future research.                                                                                  | 17                          |
| <b>FUNDING</b>                |    |                                                                                                                                                                                                          |                             |
| Funding                       | 27 | Describe sources of funding for the systematic review and other support (e.g., supply of data); role of funders for the systematic review.                                                               | 3                           |

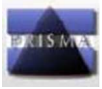

# PRISMA 2009 Checklist

1  
2  
3  
4  
5  
6  
7  
8  
9  
10  
11  
12  
13  
14  
15  
16  
17  
18  
19  
20  
21  
22  
23  
24  
25  
26  
27  
28  
29  
30  
31  
32  
33  
34  
35  
36  
37  
38  
39  
40  
41  
42  
43  
44  
45  
46  
47  
48  
49

doi:10.1371/journal.pmed1000097

For more information, visit: [www.prisma-statement.org](http://www.prisma-statement.org).

Page 2 of 2

For peer review only
