# Supplementary material for: Applicability of evidence from previous systematic reviews on immunotherapy in current practice of childhood asthma treatment: a GRADE (Grading of Recommendations Assessment, Development and Evaluation) systematic review
Source: PubMed Central journal article supplement — BMJ Open. 2017 Dec 28;7(12):e016326. doi: 10.1136/bmjopen-2017-016326 (PMC5770836; doi:10.1136/bmjopen-2017-016326), 2017-12-28
Supplement: bmjopen-2017-016326supp001.pdf [file bmjopen-2017-016326supp001.pdf]

**Table E1. Literature search**

| <b>Search Cochrane Databases of Systematic Reviews, Database of Abstracts of Reviews of Effectiveness, and Central; Literature search 2015, April 25<sup>th</sup></b> |                                                                                                                                                                                                                                    |
|-----------------------------------------------------------------------------------------------------------------------------------------------------------------------|------------------------------------------------------------------------------------------------------------------------------------------------------------------------------------------------------------------------------------|
| 1.                                                                                                                                                                    | "asthmazoekacties jan 2012".ti. (0)                                                                                                                                                                                                |
| 2.                                                                                                                                                                    | asthma.tw. (14671)                                                                                                                                                                                                                 |
| 3.                                                                                                                                                                    | Bronchial Spasm.tw. (15)                                                                                                                                                                                                           |
| 4.                                                                                                                                                                    | asthma*.tw. (17541)                                                                                                                                                                                                                |
| 5.                                                                                                                                                                    | wheez*.tw. (869)                                                                                                                                                                                                                   |
| 6.                                                                                                                                                                    | bronchospas*.tw. (777)                                                                                                                                                                                                             |
| 7.                                                                                                                                                                    | (bronch* adj8 spas*).tw. (52)                                                                                                                                                                                                      |
| 8.                                                                                                                                                                    | bronchoconstrict*.tw. (1663)                                                                                                                                                                                                       |
| 9.                                                                                                                                                                    | (bronch* adj8 constrict*).tw. (71)                                                                                                                                                                                                 |
| 10.                                                                                                                                                                   | airway* inflammation*.tw. (704)                                                                                                                                                                                                    |
| 11.                                                                                                                                                                   | or/2-10 (18894)                                                                                                                                                                                                                    |
| 12.                                                                                                                                                                   | immunotherap*.kw,tw. (2803)                                                                                                                                                                                                        |
| 13.                                                                                                                                                                   | 11 and 12 (473)                                                                                                                                                                                                                    |
| 14.                                                                                                                                                                   | subcutaneou*.kw,tw. (8020)                                                                                                                                                                                                         |
| 15.                                                                                                                                                                   | 12 and 14 (259)                                                                                                                                                                                                                    |
| 16.                                                                                                                                                                   | 15 (259)                                                                                                                                                                                                                           |
| 17.                                                                                                                                                                   | limit 16 to yr="2008 -Current" (57)                                                                                                                                                                                                |
| <b>Search Medline 2017, June, 2<sup>nd</sup></b>                                                                                                                      |                                                                                                                                                                                                                                    |
| 1                                                                                                                                                                     | "Effect of one-year subcutaneous and sublingual immunotherapy on clinical and laboratory parameters in children with rhinitis and asthma: a randomized, placebo-controlled, double-blind, double-dummy study".fc_titl. (1)         |
| 2                                                                                                                                                                     | "A double-blind, placebo-controlled study of house dust mite immunotherapy in Chinese asthmatic patients".fc_titl. (1)                                                                                                             |
| 3                                                                                                                                                                     | "Effect of specific immunotherapy added to pharmacologic treatment and allergen avoidance in asthmatic patients allergic to house dust mite".fc_titl. (1)                                                                          |
| 4                                                                                                                                                                     | "abramson\$.fc_auts. and "Injection allergen immunotherapy for asthma".fc_titl. (1)                                                                                                                                                |
| 5                                                                                                                                                                     | "Efficacy of sublingual immunotherapy in asthma: systematic review of randomized-clinical trials using the Cochrane Collaboration method".fc_titl. (1)                                                                             |
| 6                                                                                                                                                                     | "Metaanalysis of the efficacy of sublingual immunotherapy in the treatment of allergic asthma in pediatric patients".fc_titl. (1)                                                                                                  |
| 7                                                                                                                                                                     | "Normansell\$.fc_auts. and "Sublingual immunotherapy for asthma".fc_titl. (1)                                                                                                                                                      |
| 8                                                                                                                                                                     | "Efficacy of sublingual immunotherapy in patients with rhinitis and asthma due to house dust mite. A double-blind study".fc_titl. (1)                                                                                              |
| 9                                                                                                                                                                     | "Double-blind, placebo-controlled evaluation of sublingual immunotherapy with standardized olive pollen extract in pediatric ".fc_titl. (1)                                                                                        |
| 10                                                                                                                                                                    | "Clinical and immunologic effects of long-term sublingual immunotherapy in asthmatic children sensitized to mites: a double-blind, placebo-controlled ".fc_titl. (1)                                                               |
| 11                                                                                                                                                                    | "Efficacy of sublingual immunotherapy with high-dose mite extracts in asthma: a multi-center, double-blind, randomized, and placebo-controlled study in Taiwan".fc_titl. (1)                                                       |
| 12                                                                                                                                                                    | "Immunomodulation during sublingual therapy in allergic children".fc_titl. (1)                                                                                                                                                     |
| 13                                                                                                                                                                    | "Preseasonal local allergoid immunotherapy to grass pollen in children: a double-blind, placebo-controlled, randomized trial".fc_titl. (1)                                                                                         |
| 14                                                                                                                                                                    | "Sublingual immunotherapy and influence on urinary leukotrienes in seasonal pediatric allergy".fc_titl. (1)                                                                                                                        |
| 15                                                                                                                                                                    | "A prospective, randomized, double-blind, placebo-controlled multi-centre study on the efficacy and safety of sublingual immunotherapy (SLIT) in children with seasonal allergic rhinoconjunctivitis to grass pollen".fc_titl. (1) |
| 16                                                                                                                                                                    | "Sublingual immunotherapy with allergenic extract of Dermatophagoides pteronyssinus in asthmatic children".fc_titl. (1)                                                                                                            |
| 17                                                                                                                                                                    | "Sublingual immunotherapy abrogates seasonal bronchial hyperresponsiveness in children with Parietaria-induced respiratory allergy: a randomized controlled trial. ".fc_titl. (1)                                                  |
| 18                                                                                                                                                                    | "Impact of sublingual immunotherapy on seasonal asthma and skin reactivity in children allergic to Parietaria pollen treated with ".fc_titl. (1)                                                                                   |

19 "Double-blind placebo-controlled study of sublingual immunotherapy with house dust mite extract ".fc\_titl. (1)

20 "Efficacy of sublingual immunotherapy in children with asthma and rhinitis: a double-blind, placebo-controlled study. ".fc\_titl. (1)

21 or/1-3 (3)

22 or/4-20 (17)

23 21 or 22 (20)

24 "controle refs slit scit".ti. (0)

25 asthma/ or bronchial spasm/ (118686)

26 (asthma\* or wheez\* or bronchospas\* or bronchoconstrict\* or (airway\* adj inflammat\*)).tw. (155964)

27 (asthma\* or wheez\* or bronchospas\* or bronchoconstrict\* or (airway\* adj inflammat\*)).kf. (15593)

28 or/25-27 (176447)

29 23 and 28 (19)

30 23 not 29 (1)

31 rhinitis, allergic, perennial/ or rhinitis, allergic, seasonal/ (18469)

**32 28 or 31 (188701)=P**

33 Immunotherapy/ (36085)

34 Sublingual Immunotherapy/ (231)

35 Desensitization, Immunologic/ (9795)

36 (SCIT or SLIT or (sublingual adj1 immunotherap\*) or (subcutaneous adj1 immunotherap\*)).tw. (16817)

37 (SCIT or SLIT or (sublingual adj1 immunotherap\*) or (subcutaneous adj1 immunotherap\*)).kf. (442)

38 or/33-37 (61196)

39 "Injections, Subcutaneous"/ (31338)

40 33 and 39 (294)

**41 34 or 35 or 36 or 37 or 40 (26000)=I**

42 28 and 41 (3043)

43 "filter systematic reviews".ti. (0)

44 meta analysis.pt. (81124)

45 (meta-anal\$ or metaanal\$).af. (144025)

46 (quantitativ\$ adj10 (review\$ or overview\$)).tw. (6863)

47 (systematic\$ adj10 (review\$ or overview\$)).tw. (119262)

48 (methodologic\$ adj10 (review\$ or overview\$)).tw. (9132)

49 (quantitativ\$ adj10 (review\$ or overview\$)).kf. (32)

50 (systematic\$ adj10 (review\$ or overview\$)).kf. (8208)

51 (methodologic\$ adj10 (review\$ or overview\$)).kf. (36)

52 medline.tw. and review.pt. (64452)

53 (pooled adj3 analy\*).tw. (14081)

54 (pooled adj3 analy\*).kf. (128)

55 "cochrane\$".fc\_jour. (13410)

**56 or/44-55 (258042)**

57 randomized-controlled-trial.pt. (465042)

58 controlled-clinical-trial.pt. (94188)

59 randomized controlled trial/ (465042)

60 randomi?ed controlled trial?.tw. (131360)

61 random-allocation.tw,kf. (1445)

62 double-blind-method.tw,kf. (456)

63 single-blind-method.tw,kf. (81)

64 (random adj8 (selection? or sample?)).tw. (40888)

65 random\$.tw. (952984)

**66 or/57-65 (1156986)**

67 "rct filter sprec".ti. (0)

68 (child??? or childhood or infant\* or p?ediatr\* or perinat\* or neonat\* or newborn\* or infan\* or boy? or girl? or kid? or schoolage\* or juvenil\* or adolescen\* or toddler?).tw. (2058217)

69 exp Child/ (1759435)

70 exp infant/ (1058929)

71 "Adolescent"/ (1847650)

**72 or/68-71 (3858822)**

73 "filter child".ti. (0)  
74 23 and 72 (19)  
75 23 not 74 (1)  
76 32 and 41 and 56 (184)  
**77 32 and 41 and 72 and 56 (90) systrev**

**Search Embase 2017, June, 2<sup>nd</sup>**

1 asthma/ (202909)  
2 bronchospasm/ (25054)  
3 bronchoconstriction/ (1300)  
4 respiratory tract inflammation/ or allergic airway inflammation/ (11606)  
5 (asthma\* or wheez\* or bronchospas\* or bronchoconstrict\* or (airway\* adj inflammat\*)).tw. (215497)  
6 (asthma\* or wheez\* or bronchospas\* or bronchoconstrict\* or (airway\* adj inflammat\*)).kw. (51383)  
7 perennial rhinitis/ (3627)  
**8 or/1-7 (279683)=P**  
9 sublingual immunotherapy/ (1695)  
10 immunotherapy/ (67533)  
11 subcutaneous drug administration/ (97428)  
12 10 and 11 (1148)  
13 subcutaneous immunotherapy/ (1226)  
14 (SCIT or SLIT or (sublingual adj1 immunotherap\*) or (subcutaneous adj1 immunotherap\*)).tw. (19513)  
15 (SCIT or SLIT or (sublingual adj1 immunotherap\*) or (subcutaneous adj1 immunotherap\*)).kw. (1765)  
**16 9 or 12 or 13 or 14 or 15 (21563)=I**  
17 8 and 16 (2229)  
18 "Effect of one-year subcutaneous and sublingual immunotherapy on clinical and laboratory parameters in children with rhinitis and asthma: a randomized, placebo-controlled, double-blind, double-dummy study".fc\_titl. (1)  
19 "A double-blind, placebo-controlled study of house dust mite immunotherapy in Chinese asthmatic patients".fc\_titl. (1)  
20 "Effect of specific immunotherapy added to pharmacologic treatment and allergen avoidance in asthmatic patients allergic to house dust mite".fc\_titl. (1)  
21 "abramson\$".fc\_auts. and "Injection allergen immunotherapy for asthma".fc\_titl. (1)  
22 "Efficacy of sublingual immunotherapy in asthma: systematic review of randomized-clinical trials using the Cochrane Collaboration method".fc\_titl. (1)  
23 "Metaanalysis of the efficacy of sublingual immunotherapy in the treatment of allergic asthma in pediatric patients".fc\_titl. (1)  
24 "Normansell\$".fc\_auts. and "Sublingual immunotherapy for asthma".fc\_titl. (1)  
25 "Efficacy of sublingual immunotherapy in patients with rhinitis and asthma due to house dust mite. A double-blind study".fc\_titl. (1)  
26 "Double-blind, placebo-controlled evaluation of sublingual immunotherapy with standardized olive pollen extract in pediatric ".fc\_titl. (1)  
27 "Clinical and immunologic effects of long-term sublingual immunotherapy in asthmatic children sensitized to mites: a double-blind, placebo-controlled ".fc\_titl. (1)  
28 "Efficacy of sublingual immunotherapy with high-dose mite extracts in asthma: a multi-center, double-blind, randomized, and placebo-controlled study in Taiwan".fc\_titl. (1)  
29 "Immunomodulation during sublingual therapy in allergic children".fc\_titl. (1)  
30 "Preseasonal local allergoid immunotherapy to grass pollen in children: a double-blind, placebo-controlled, randomized trial".fc\_titl. (1)  
31 "Sublingual immunotherapy and influence on urinary leukotrienes in seasonal pediatric allergy".fc\_titl. (1)  
32 "A prospective, randomized, double-blind, placebo-controlled multi-centre study on the efficacy and safety of sublingual immunotherapy (SLIT) in children with seasonal allergic rhinoconjunctivitis to grass pollen".fc\_titl. (2)  
33 "Sublingual immunotherapy with allergenic extract of Dermatophagoides pteronyssinus in asthmatic children".fc\_titl. (2)  
34 "Sublingual immunotherapy abrogates seasonal bronchial hyperresponsiveness in children with Parietaria-induced respiratory allergy: a randomized controlled trial. ".fc\_titl. (1)

35 "Impact of sublingual immunotherapy on seasonal asthma and skin reactivity in children allergic to Parietaria pollen treated with ".fc\_titl. (1)

36 "Double-blind placebo-controlled study of sublingual immunotherapy with house dust mite extract ".fc\_titl. (1)

37 "Efficacy of sublingual immunotherapy in children with asthma and rhinitis: a double-blind, placebo-controlled study. ".fc\_titl. (1)

38 or/18-20 (3)

39 or/21-37 (19)

40 38 or 39 (22)

41 "controle refs slit scit".ti. (0)

42 "filter systematic reviews & meta-analyses Embase".ti. (0)

43 meta analysis/ (127495)

44 "systematic review"/ (139284)

45 (meta-analy\$ or metaanaly\$).tw. (145912)

46 (systematic\$ adj4 (review\$ or overview\$)).tw. (139834)

47 (quantitativ\$ adj5 (review? or overview?)).tw. (3786)

48 (methodologic adj5 (overview? or review?)).tw. (325)

49 (review\$ adj3 (database? or medline or embase or cinahl)).tw. (19428)

50 (pooled adj3 analy\$).tw. (20108)

51 (extensive adj3 review\$ adj3 literature).tw. (2903)

52 (meta or synthesis or (literature adj8 database?) or extraction).tw. (1197812)

53 review.pt. (2259303)

54 52 and 53 (112526)

55 (systematic\$ adj4 (review\$ or overview\$)).kw. (16750)

56 (quantitativ\$ adj5 (review? or overview?)).kw. (48)

57 (pooled adj3 analy\$).kw. (354)

58 or/43-51,54-57 (381419)

59 "filter rct embase".ti. (0)

60 controlled clinical trial/ or randomized controlled trial/ (614267)

61 randomization/ (73811)

62 Major Clinical Study/ (2803898)

63 random\$.tw. (1196822)

64 Double Blind Procedure/ (139034)

65 or/60-64 (3916117)

66 "einde filter rct embase".ti. (0)

67 (child??? or childhood or infant\* or p?ediatr\* or perinat\* or neonat\* or newborn\* or infan\* or boy? or girl? or kid? or schoolage\* or juvenil\* or adolescen\* or toddler?).tw. (2468214)

68 child/ (1526632)

69 infant/ (566151)

70 adolescent/ (1414197)

71 or/67-70 (3656088)

**72 17 and 58 and 71 (85) systrev**

73 (17 and 65 and 71) not 58 (370) rct

74 17 and 58 (208)

75 74 not 72 (123)

76 75 (123)

77 limit 76 to yr="2016 -Current" (14)

78 76 (123)

**79 limit 78 to yr="2015 -Current" (31) extra systrev**

### Search Cochrane 2017, June, 2<sup>nd</sup>

|    |                                                      |       |
|----|------------------------------------------------------|-------|
| #1 | asthma*:ti,ab,kw                                     | 26843 |
| #2 | MeSH descriptor: [Asthma] this term only             | 9761  |
| #3 | MeSH descriptor: [Bronchial Spasm] explode all trees | 360   |
| #4 | wheez*:ti,ab,kw                                      | 1642  |
| #5 | bronchospas*:ti,ab,kw                                | 1594  |
| #6 | (bronch* near/8 spas*):ti,ab,kw                      | 460   |
| #7 | bronchoconstrict*:ti,ab,kw                           | 2204  |

|     |                                                                                                                                                                                                |        |
|-----|------------------------------------------------------------------------------------------------------------------------------------------------------------------------------------------------|--------|
| #8  | (bronch* near/8 constrict*):ti,ab,kw                                                                                                                                                           | 121    |
| #9  | (airway* near/1 inflammation*):ti,ab,kw                                                                                                                                                        | 1236   |
| #10 | #1 or #2 or #3 or #4 or #5 or #6 or #7 or #8 or #9                                                                                                                                             | 28980  |
| #11 | (perennial or seasonal or allergen* or hyposensiti*):ti,ab,kw                                                                                                                                  | 10214  |
| #12 | immunotherap*:ti,ab,kw                                                                                                                                                                         | 6399   |
| #13 | MeSH descriptor: [Immunotherapy] this term only                                                                                                                                                | 1140   |
| #14 | (SCIT or SLIT or (sublingual near/1 immunotherap*) or (subcutaneous near/1 immunotherap*)):ti,ab,kw                                                                                            | 2033   |
| #15 | #11 or #12 or #13 or #14                                                                                                                                                                       | 15912  |
| #16 | #10 and #15                                                                                                                                                                                    | 3351   |
| #17 | (child* or childhood or infant* or pediatr* or paediatric* or perinat* or neonat* or newborn* or infan* or boy* or girl* or kid* or schoolage* or juvenil* or adolescen* or toddler*):ti,ab,kw | 239918 |
| #18 | #16 and #17                                                                                                                                                                                    | 1570   |
| #19 | immunotherap*:ti,kw                                                                                                                                                                            | 5661   |
| #20 | subcutaneou*:ti,kw                                                                                                                                                                             | 12350  |
| #21 | (SCIT or SLIT or (sublingual near/1 immunotherap*) or (subcutaneous near/1 immunotherap*)):ti,kw                                                                                               | 1257   |
| #22 | #13 or #19 or #20 or #21                                                                                                                                                                       | 17830  |
| #23 | #18 and #22                                                                                                                                                                                    | 516    |
| #24 | (perennial or seasonal or allergen* or hypo-sensiti*):ti                                                                                                                                       | 5205   |
| #25 | #22 or #24                                                                                                                                                                                     | 22321  |
| #26 | #25 and #18                                                                                                                                                                                    | 927    |
| #27 | #16 and #22                                                                                                                                                                                    | 1071   |
| #28 | MeSH descriptor: [Injections, Subcutaneous] explode all trees                                                                                                                                  | 4017   |
| #29 | (#12 or #13) and (#20 or #28)                                                                                                                                                                  | 646    |
| #30 | #29 or #21 or #24                                                                                                                                                                              | 6616   |
| #31 | MeSH descriptor: [Desensitization, Immunologic] 2 tree(s) exploded                                                                                                                             | 872    |
| #32 | (#31 or #30) and #10                                                                                                                                                                           | 1961   |
| #33 | MeSH descriptor: [Child] explode all trees                                                                                                                                                     | 227    |
| #34 | MeSH descriptor: [Adolescent] explode all trees                                                                                                                                                | 90499  |
| #35 | MeSH descriptor: [Infant] explode all trees                                                                                                                                                    | 15066  |
| #36 | #17 or #33 or #34 or #35                                                                                                                                                                       | 239918 |
| #37 | #32 and #36                                                                                                                                                                                    | 816    |

| <b>Results</b>                                    |    |
|---------------------------------------------------|----|
| Cochrane Databases of Systematic Reviews          | 19 |
| Database of Abstracts of Reviews of Effectiveness | 7  |
| Cochrane Central Trials Register                  | 57 |
| emb20170602 scit slit systrev.                    | 53 |
| emb20170602 scit slit extra vanaf2015systrev      | 26 |
| med20170602 scit slit systrev.                    | 89 |
| coc sr20170601 extra astma scit slit.             | 4  |
| coc dare20170602                                  | 5  |
