# Supplementary material for: Applicability of evidence from previous systematic reviews on immunotherapy in current practice of childhood asthma treatment: a GRADE (Grading of Recommendations Assessment, Development and Evaluation) systematic review
Source: PubMed Central journal article supplement — BMJ Open. 2017 Dec 28;7(12):e016326. doi: 10.1136/bmjopen-2017-016326 (PMC5770836; doi:10.1136/bmjopen-2017-016326), 2017-12-28
Supplement: bmjopen-2017-016326supp002.pdf [file bmjopen-2017-016326supp002.pdf]

**Table E2. Evidence table systematic reviews (SCIT + SLIT)**

|                                    | <b>Abramson, 2010<sup>16</sup></b>                                                                                                                                                                                                           | <b>Calamita, 2006<sup>29</sup></b>                                                                                                                                                                   | <b>Penagos, 2008<sup>32</sup></b>                                                                                                                                                                                                                                                     |
|------------------------------------|----------------------------------------------------------------------------------------------------------------------------------------------------------------------------------------------------------------------------------------------|------------------------------------------------------------------------------------------------------------------------------------------------------------------------------------------------------|---------------------------------------------------------------------------------------------------------------------------------------------------------------------------------------------------------------------------------------------------------------------------------------|
| <b>Study design</b>                | Cochrane systematic review, consisting of 90 RCT's. 14 RCT's were carried out in children only; 24 were done in children and adults. The total study population (children and adults) consisted of 3.792 patients (of whom 3.459 had asthma) | Systematic review, consisting of 25 RCT's. Only 9 RCT's were carried out in children only. The total study population consisted of 1.706 patients (adults and children, with asthma and/or rhinitis) | Systematic review, consisting of 9 RCT's, all carried out in children. The total study population comprised 441 patients with asthma (seasonal, mild, moderate, and persistent)                                                                                                       |
| <b>Age (mean)</b>                  | Not specified, variation between included studies                                                                                                                                                                                            | Not specified, there is a limited description of the characteristics of the included studies                                                                                                         | Range specified per study, total range: 4-17 years                                                                                                                                                                                                                                    |
| <b>Setting (in RCT's)</b>          | -                                                                                                                                                                                                                                            | -                                                                                                                                                                                                    | -                                                                                                                                                                                                                                                                                     |
| <b>Diagnosis (asthma/rhinitis)</b> | Asthma                                                                                                                                                                                                                                       | Asthma and rhinitis                                                                                                                                                                                  | Asthma                                                                                                                                                                                                                                                                                |
| <b>Eligibility criteria</b>        | RCT's, patients with asthma, allergen specific subcutaneous immunotherapy (administration of extracts of house dust mites, pollens, animal danders or molds, chemically modified allergoids or antigen-antibody complexes)                   | RCT's, double blinded, and open studies, patients with asthma and/or rhinitis, sublingual immunotherapy (with or without swallowing, all types of allergen, all doses, all lengths of treatment)     | RCT's, double blinded, placebo controlled, patients ≤ 18 years, with a history of allergic asthma, with identified causal allergen, and proven IgE sensitization. Sublingual immunotherapy (with or without swallowing, all types of allergen, all doses, all durations of treatment) |
| <b>Type of immunotherapy</b>       | Subcutaneous immunotherapy (variation of allergen abstracts in different included studies)                                                                                                                                                   | Sublingual immunotherapy, mainly pollen and mite                                                                                                                                                     | Sublingual immunotherapy, mainly mites                                                                                                                                                                                                                                                |
| <b>Intervention</b>                | Subcutaneous immunotherapy                                                                                                                                                                                                                   | Sublingual immunotherapy, mainly pollen and mite                                                                                                                                                     | Sublingual immunotherapy (mainly mites, further: <i>O europaea</i> , <i>Holcus</i> , <i>P pretense</i> <i>Dermatophagoides pteronyssinus</i> , grass mix), great variation in duration, range: 3-32 months                                                                            |
| <b>Control</b>                     | Placebo                                                                                                                                                                                                                                      | Placebo                                                                                                                                                                                              | Placebo                                                                                                                                                                                                                                                                               |
| <b>Primary outcomes</b>            | Asthmatic symptoms<br>Asthma medication requirements<br>Lung function<br>Nonspecific bronchial hyper-reactivity<br>Allergen specific bronchial hyper-reactivity                                                                              | Asthmatic symptoms (symptom score)<br>Asthmatic medication requirement<br>Respiratory function tests (PEFR, FEV <sub>1</sub> , FEF25-75%)<br>Nonspecific bronchial provocation<br>Adverse effects    | Asthma symptoms<br>Medication scores                                                                                                                                                                                                                                                  |
| <b>Secondary outcomes</b>          | Local reactions<br>Systemic reactions                                                                                                                                                                                                        | -                                                                                                                                                                                                    |                                                                                                                                                                                                                                                                                       |

|                |                                                                                                                     |                                                                   |   |
|----------------|---------------------------------------------------------------------------------------------------------------------|-------------------------------------------------------------------|---|
| <b>Comment</b> | The results have not been presented separately for children in the review. We conducted new suitable meta-analyses. | The authors mentioned they used the Cochrane Collaboration method | - |
|----------------|---------------------------------------------------------------------------------------------------------------------|-------------------------------------------------------------------|---|

Abbreviations: FEF25-75: maximum mid expiratory flow; FEV<sub>1</sub>: forced expiratory volume in 1 second; PEF: peak expiratory flow rate; RCT: randomized controlled trial; SCIT: subcutaneous immunotherapy; SLIT: sublingual immunotherapy
