# Supplementary material for: Applicability of evidence from previous systematic reviews on immunotherapy in current practice of childhood asthma treatment: a GRADE (Grading of Recommendations Assessment, Development and Evaluation) systematic review
Source: PubMed Central journal article supplement — BMJ Open. 2017 Dec 28;7(12):e016326. doi: 10.1136/bmjopen-2017-016326 (PMC5770836; doi:10.1136/bmjopen-2017-016326), 2017-12-28
Supplement: bmjopen-2017-016326supp003.pdf [file bmjopen-2017-016326supp003.pdf]

**Table E3. Evidence table SCIT studies**

| Author, date                        | Study design                                                                                | Setting    | Eligibility | Participants (number, gender, age, and descriptive)                                                     | Asthma type,* severity (e.g. on ICS?)                                                     | Allergy type (mono/multi, allergens,                     | Intervention (type, dose, duration)                                                                                         | Control | Follow-up (from start | Outcomes                                                                                   | Results reported by author†                                                                  | Critical appraisal‡                                                                   | Comments                                                                                                     |
|-------------------------------------|---------------------------------------------------------------------------------------------|------------|-------------|---------------------------------------------------------------------------------------------------------|-------------------------------------------------------------------------------------------|----------------------------------------------------------|-----------------------------------------------------------------------------------------------------------------------------|---------|-----------------------|--------------------------------------------------------------------------------------------|----------------------------------------------------------------------------------------------|---------------------------------------------------------------------------------------|--------------------------------------------------------------------------------------------------------------|
| <b>Adkinson, 1997</b> <sup>45</sup> | Double blind, placebo controlled, parallel group RCT Placebo caramelized saline + histamine | ?          |             | 121 allergic children with perennial asthma Mean age 9.2 (range 5.4 to 14) years, 79% boys              | Perennial asthma 34% ICS, 13% systemic                                                    | 80% dust mite, 77% ragweed, 69% rye grass                | Subcutaneous multiple allergen immunotherapy Median 6 (range 2 to 7) allergen extracts                                      | Placebo | ?                     | Symptom scores Medication scores PEF rates Nonspecific BHR (methacholin FEV <sub>1</sub> ) | SCIT not useful in moderate to severe perennial allergic asthma                              | Study useful, however low rate of ICS                                                 | Allocation concealment unclear                                                                               |
| <b>Altintas, 1999</b> <sup>46</sup> | Open placebo controlled RCT multiple groups                                                 | university |             | 34 poorly controlled mild to moderate asthmatics aged 4 to 18 years; 30 patients in 3 groups, 5 placebo | ICS use not specified, no medical details on asthma                                       | Mono-sensitization <i>Dermatophagoides pteronyssinus</i> | Subcutaneous immunotherapy with adsorbed or aqueous <i>Dermatophagoides pteronyssinus</i> extracts (in different dilutions) | Placebo |                       | Symptom medication score IgE and IgG4 level Bronchial provocation tests                    | SCIT is useful and safe; no conclusion on asthma                                             | Study not useful No data on ICS,                                                      | Allocation concealment unclear Study designed to compare 3 different abstracts of immunotherapy              |
| <b>Dreborg, 1986</b> <sup>47</sup>  | RCT, double blind Freeze dried caramelized histamine placebo                                | European   |             | 30 children with <i>Cladosporium</i> allergy, aged 5 to 17 years                                        | Clinical history suggesting mold-induced asthma and/or rhinoconjunctivitis ICS not stated | <i>Cladosporium</i> allergy                              | 10 months <i>Cladosporium</i> subcutaneous immunotherapy Or placebo                                                         | Placebo |                       | Symptoms Medication PEF (no SD reported) Allergen specific BHR                             | Decrease in medication score, but not in symptom score Lower medication score in verum group | Study not useful No information on asthma medication No fixed study medication scheme | Allocation concealment unclear Asthma diagnosis not specified, (worsening of asthma in the <i>Cladospori</i> |

|                                     |                                                             |                                |                                                                                                                        |                                                      |  |                                                                                        |         |  |                                                                       |                                                                                                                                                               |                                                       |                                                                                                                              |
|-------------------------------------|-------------------------------------------------------------|--------------------------------|------------------------------------------------------------------------------------------------------------------------|------------------------------------------------------|--|----------------------------------------------------------------------------------------|---------|--|-----------------------------------------------------------------------|---------------------------------------------------------------------------------------------------------------------------------------------------------------|-------------------------------------------------------|------------------------------------------------------------------------------------------------------------------------------|
|                                     |                                                             |                                |                                                                                                                        |                                                      |  |                                                                                        |         |  |                                                                       |                                                                                                                                                               |                                                       | um season)                                                                                                                   |
| <b>Hill, 1982<sup>48</sup></b>      | Single blind RCT, rye grass pollen placebo                  | University Australia           | 20 asthmatic children, aged 9 to 14 years, with rye grass pollen allergy, positive at bronchoprovocation               | ICS N=1 beclomethasone N=8 cromoglycate              |  | Subcutaneous immunotherapy with aqueous rye grass pollen extract                       | Placebo |  | Symptoms Medications (medians only reported, no SD)                   | no evidence that limited hyposensitization with a pollen extract is of any clinical benefit in seasonal asthma despite evidence of an immunological response. | Study not useful Primary outcome = IgE and IgG levels | No allocation concealment                                                                                                    |
| <b>Johnstone, 1961<sup>49</sup></b> | RCT, double blind, 4-year follow up Buffered saline control | United States general hospital | 173 children with perennial asthma Severity = number of days of wheeze/year Placebo: n=41                              | No medication mentioned at all, no medication scores |  | Subcutaneous immunotherapy with relevant allergen extracts, administered by 3 regimens | Placebo |  | Asthma symptoms reported by mother Number of new allergies developing | Less new allergies developing Less symptoms and asthma attacks in the last year in the group 4                                                                | Study not useful No asthma medication scores          | Allocation concealment unclear 4 different groups, 1 placebo (n=41) Group 2-4 different strength SCIT Last year single blind |
| <b>Johnstone, 1968<sup>50</sup></b> | RCT, double blind Buffered saline control                   |                                | 130 children with perennial asthma; Severity = number of days of wheeze/year RCT, double blind Buffered saline control | No medication mentioned, no medication scores        |  | Subcutaneous immunotherapy with relevant allergens administered by 3 regimens          | Placebo |  | Asthma symptoms reported by mother                                    | More children in SCIT group high dose overgrowing asthma at the age of 16 than placebo                                                                        | Study not useful No asthma medication scores          | Allocation concealment unclear 14-years follow up of Johnstone 1961                                                          |
| <b>Price, 1984<sup>51</sup></b>     | RCT, double blind                                           |                                | 25 children with perennial asthma, aged 5 to 15 years                                                                  | Asthma severity not specified asthma                 |  | Subcutaneous immunotherapy with <i>Dermatophag</i>                                     | Placebo |  | Symptoms Medication Lung function Bronchoprovocation                  | Loss of late reaction on bronchoprovocation Only one out of 6                                                                                                 | Study not useful Bronchoprovocation is                | Continuation of study by Warner 1978 for second                                                                              |

|                                      |                                                     |                             |                                                                                                                                          |                                                                                            |                                                             |                                                                                                                                                                                                                                                                                                                                                    |                 |                           |                                                                                                                                              |                                                                                                                                                                                                                                                                                                                                                                                                         |                                                                   |                                                                        |
|--------------------------------------|-----------------------------------------------------|-----------------------------|------------------------------------------------------------------------------------------------------------------------------------------|--------------------------------------------------------------------------------------------|-------------------------------------------------------------|----------------------------------------------------------------------------------------------------------------------------------------------------------------------------------------------------------------------------------------------------------------------------------------------------------------------------------------------------|-----------------|---------------------------|----------------------------------------------------------------------------------------------------------------------------------------------|---------------------------------------------------------------------------------------------------------------------------------------------------------------------------------------------------------------------------------------------------------------------------------------------------------------------------------------------------------------------------------------------------------|-------------------------------------------------------------------|------------------------------------------------------------------------|
|                                      | Saline placebo control                              |                             |                                                                                                                                          | medication not specified                                                                   |                                                             | <i>oides pteronyssinus</i> extracts                                                                                                                                                                                                                                                                                                                |                 |                           |                                                                                                                                              | children with severe asthma improved                                                                                                                                                                                                                                                                                                                                                                    | surrogate outcome;                                                | year with placebo group crossed over to active immunotherapy           |
| <b>Tsai, 2010</b> <sup>34</sup>      | RCT, no blinding, no intervention in control group  | University hospital, Taiwan | 40 children (21 boys), aged 5-14 years (average 8,5) >1 year moderate persistent to severe asthma, all monosensitized to house dust mite | Moderate persistent to severe asthma, using daily medication, most patient at least on ICS | House dust mite, diagnosed by SPT or specific antibody test | Subcutaneous injections of extracts of <i>Dermatophagoides pteronyssinus</i> and <i>Dermatophagoides farina</i> (10000 AU/ml), initial dose 0,5AU/ml once a week. Dosage was increased weekly by 25-100% to reach optimal maintenance dose, with respect to local or systemic reaction. Maintenance therapy every 2 weeks during at least 3 months | No intervention | 6 months (last follow-up) | Primary: Medication score (5 point scale, modified GINA) Secondary: PEF, asthma symptom score, number of contacts with health care providers | Mean medication score declined after 6 months in both groups; no significant difference between group differences. Both groups had reduction of asthma symptoms after 6 months, but no difference between group differences. There was no difference in PEF. Patients in the intervention group had more clinical visits than the control group, but no difference in emergency room or hospitalization | Very few patients, no blinding, randomization procedure not clear |                                                                        |
| <b>Valovirta, 1984</b> <sup>52</sup> | RCT, double blind Caramel histamine placebo control | ?                           | 27 asthmatic children allergic to dog dander, aged 5 to 18 years                                                                         | Asthma severity not specified asthma medication not specified                              |                                                             | Subcutaneous immunotherapy with aluminium hydroxide bound dog                                                                                                                                                                                                                                                                                      | Placebo         |                           | Symptoms Allergen specific BHR                                                                                                               | The decrease in bronchial sensitivity was less marked than that in conjunctival sensitivity and                                                                                                                                                                                                                                                                                                         | Study not useful No asthma medication scores                      | Primary outcome dog dander sensitivity, not asthma 2 authors connected |

|                                   |                                            |                            |                                                                                                                                                     |                                       |                                                      |                                                                                                                                                                                                                                                                                        |                                                     |         |                                                                                                                                                                       |                                                                                                                                                                                    |                                                                                                                   |                                                           |
|-----------------------------------|--------------------------------------------|----------------------------|-----------------------------------------------------------------------------------------------------------------------------------------------------|---------------------------------------|------------------------------------------------------|----------------------------------------------------------------------------------------------------------------------------------------------------------------------------------------------------------------------------------------------------------------------------------------|-----------------------------------------------------|---------|-----------------------------------------------------------------------------------------------------------------------------------------------------------------------|------------------------------------------------------------------------------------------------------------------------------------------------------------------------------------|-------------------------------------------------------------------------------------------------------------------|-----------------------------------------------------------|
|                                   |                                            |                            |                                                                                                                                                     |                                       |                                                      | allergen extract                                                                                                                                                                                                                                                                       |                                                     |         |                                                                                                                                                                       | statistically not significant                                                                                                                                                      |                                                                                                                   | to pharmaceutical company                                 |
| <b>Warner, 1978</b> <sup>53</sup> | RCT, double blind Tyrosine placebo control | University, United Kingdom | 51 asthmatic children, aged 5 to 14 years, with positive <i>Dermatophagoides pteronyssinus</i> challenge                                            | ICS n=12, cromoglycate n=24 SABA n=14 | House dust mite, SPT and bronchoprovocation positive | Subcutaneous immunotherapy with tyrosine adsorbed <i>Dermatophagoides pteronyssinus</i> extracts                                                                                                                                                                                       | Placebo                                             | 1 year  | Symptoms Medication Lung function (PEF, FEV 0.75) Allergen specific BHR                                                                                               | Less asthma medication in active group, but no difference in control or immediate response on bronchoprovocation                                                                   | Useful; however incomparable low level of ICS                                                                     | Allocation concealment unclear No fixed medication scheme |
| <b>Zielen, 2010</b> <sup>55</sup> | RCT, single blind, no control intervention | Multinational, multicenter | 56 children with asthma GINA treatment II-III, on ICS, house dust mite (positive SPT), positive conjunctival provocation, significant RAST response | All on ICS, GINA II-III treatment     | House dust mite SPT, provocative                     | SCIT with allergens extracted from <i>Dermatophagoides pteronyssinus</i> in 2 strengths: A: 1000 TU/ml; B: 10000 TU/ml. Initial therapy: weekly increasing doses strength A, followed by B. After reaching max individually tolerated dose, dosage intervals were increased to 6 weeks | No immunotherapy, only maintenance therapy with ICS | 2 years | Primary: change in ICS dose steps to achieve asthma control Secondary: change in pre-bronchodilator y PEF, immunologic changes, nonspecific bronchial hyperreactivity | Less asthma medication in SCIT group as compared to control group, no change in asthma control, higher increase in PEF in intervention group. Adverse events in 97% in both groups | Block randomization. Multicenter, multinational is possible bicenter, binational. Conflict of interest in authors |                                                           |

Abbreviations: AU: dosing units; BHR: bronchohyperreactivity; FEV1: forced expiratory volume in 1 second; GINA: Global Initiative for Asthma; ICS: inhaled corticosteroids; ml: millilitres; n: number; PEF: peak expiratory flow; RAST: radioallergent sorbent test; RCT: randomized controlled trial; SABA: short-acting beta agonist; SCIT: subcutaneous immunotherapy; SD: standard deviation; SPT: skin prick test; TU: dosing units

\* Doctors diagnosed asthma? Stable/seasonal asthma? Mild/severe asthma?

† Asthma symptoms, allergy/rhinitis symptoms, asthma control, (disease specific) quality of life, exacerbations, lung function, adverse reactions and/or complications

‡ e.g. randomization procedure, blinding, risk of bias
